# Supplementary material for: Color-tunable and white circularly polarized luminescence through confining guests into chiral MOFs
Source: Royal Society of Chemistry journal article supplement (doi:10.1039/d4cc03164d), 2024-01-01
Supplement: d4cc03164d1.pdf [file d4cc03164d1.pdf]

## Supporting Information

For

### Color-tunable and white circularly polarized luminescence through confining guests into chiral MOFs

Hong-Ru Fu,<sup>ac</sup> Ruo-Yu Zhang,<sup>ab</sup> Ting Li,<sup>a\*</sup> Chen-Ying Wei,<sup>a</sup> Shuang Liu,<sup>a</sup> Jia-Yi Xu,<sup>a</sup> Xueli Zhu,<sup>a</sup>  
Jiaojiao Wei,<sup>a\*</sup> Qing-Rong Ding,<sup>c\*</sup> Lu-Fang Ma<sup>a</sup>

<sup>a</sup>College of Chemistry and Chemical Engineering, Luoyang Normal University, Luoyang 471934, P. R. China.

<sup>b</sup>College of Chemistry and Chemical Engineering, Henan Normal University, Xinxiang 453007 China.

<sup>c</sup>State Key Laboratory of Structural Chemistry, Fujian Institute of Research on the Structure of Matter, Chinese Academy of Sciences, Fuzhou, Fujian, 350002, China.

\* Corresponding author E-mails: [liting880202@163.com](mailto:liting880202@163.com), [jjwei1992@163.com](mailto:jjwei1992@163.com), [qrding@fjirsm.ac.cn](mailto:qrding@fjirsm.ac.cn)

HR Fu: writing—reviewing and editing, funding acquisition. RY Zhang: data curation, formal analysis. T Li: data curation, formal analysis. CY Wei: formal analysis. S Liu: formal analysis. JY Xu: formal analysis. XL. Zhu: formal analysis, funding acquisition. JJ Wei: writing, funding acquisition. QR Ding: Critical revision. LF Ma: Supervision.

## 1. Materials and Methods.

All reagents and solvents were purchased commercially. Ethyl alcohol (EtOH) and N, N-dimethylformamide (DMF) (China National Pharmaceutical Group Co., Ltd.). 4-(1H-Pyrazol-4-Yl)Pyridine (4-HPPD) (CHEMSOON), Nile Red (NIR) (TCI), Coumarin 152 (C152) (TCI).

Powder X-ray diffraction (PXRD) was performed using a Rigaku Smart Lab diffractometer with a Cu K $\alpha$  source (1.541 Å), where diffraction data were collected at 2 $\theta$  angle from 5° to 50°, using a 0.01° step size and 1° min<sup>-1</sup> step speed. Solid state diffuse reflectance spectra were recorded on a UV-2600 Shimadzu spectrophotometer using a standard sample holder. Solid state emission was measured using FLS1000 spectrofluorometer. Thermogravimetric analysis (TGA) was performed on a PerkinElmer TG-7 analyzer heated from 30 °C to 700 °C at the atmosphere with a ramp rate of 5 °C/min. The fluorescence and phosphorescence spectra were conducted on Edinburgh FLS1000 with xenon arc lamp and nanosecond flash-lamp. The intrinsic circularly polarized luminescence (CPL) spectra were measured at the scanning speed rate of 100 nm/min on JASCO CPL-300 spectrometer. The circular dichroism (CD) spectra were measured from 200-800 nm range using JASCO J-810 circular dichroism spectrometer.

### 1.1 Synthesis of [Zn<sub>2</sub>(M-4-PPD)<sub>2</sub>(NO<sub>3</sub>)<sub>2</sub>] $\cdot$ DMA $\cdot$ H<sub>2</sub>O $\cdot$ EtOH (DCF-20) and [Zn<sub>2</sub>(P-4-PPD)<sub>2</sub>(NO<sub>3</sub>)<sub>2</sub>] $\cdot$ DMA $\cdot$ 2H<sub>2</sub>O $\cdot$ EtOH (LCF-20)

A mixture of Zn(NO<sub>3</sub>)<sub>2</sub> $\cdot$ 6H<sub>2</sub>O (60 mg, 0.2 mmol), 4-HPPD (4-(1H-pyrazol-4-yl)pyridine, 15 mg, 0.1 mmol) and D-cam (D-camphoric acid, 20 mg, 0.1 mmol) in the solution of H<sub>2</sub>O (1 mL), EtOH (2 mL), and DMA (N,N-dimethylacetamide, 4 mL) was sealed in a 25 mL Teflon-lined stainless steel autoclave. The autoclave was heated at 100°C for 72 h under an autogenous presser and then cooled slowly to room temperature at a rate of 10 °C $\cdot$ h<sup>-1</sup>. Colorless rodlike crystals were obtained and washed with DMA and ethanol. The yield was 81% (based on 4-HPPD). Elemental analysis: Calcd for DCF-20 (C<sub>16</sub>H<sub>21.5</sub>N<sub>3.5</sub>O<sub>3.5</sub>Zn): C, 49.97; H, 5.59; N, 12.75. Found: C, 49.47; H, 6.01; N, 12.32. LCF-20 was synthesized by using L-cam.

### 1.2 Synthesis of Guests@MOFs

The host-guest systems were prepared via an in-situ approach. Similar to the synthesis of parent crystals, a series of dyes solution were added under the different molar ratio of 4-PPD and guest . The molar ratio of 4-PPD and guest is as follows: 1.0:0.3, 1.0:0.2, 1.0:0.1, namely, 8.6, 5.7 and 2.8 mg for HBT1 were added, 8.1, 5.4 and 2.7 mg for HBT2, 7.5, 5.0 and 2.5 mg C152 as well as 9.0, 6.0 and 3.0 mg for NIR were added, while the total volume is equal to that of the host materials. After decanting the solution, the crystals were washed thoroughly with DMF and deionized water and dried in the air..

The white light was realized by introducing three dyes. The 5  $\times$  10<sup>-3</sup> mol/L DMA solution of HBT1, C152 and NIR were added in the parent solution with different concentration gradients, the total volume is equal to that of the host materials. The detail synthesis processes and final results were shown in Table S4 and Figure S30-36.

### 1.3 X-ray Data Collection and Structure Determinations

Crystallographic data of DCF-20 and LCF-20 was collected on a Rigaku Supernova diffractometer at 290 (2) K or ambient temperature with Mo-K $\alpha$  radiation ( $\lambda$  = 0.71073 Å) by  $\omega$  scan mode. The determination of the unit cell and data collection was performed with CrysAlisPro.

The structure was determined by direct methods and refined by the full-matrix least-squares method with the SHELX<sup>1</sup> and OLEX2.0<sup>2</sup> program package. All non-hydrogen atoms were located successfully from Fourier maps and were refined anisotropically. The H atoms on the ligands were placed in idealized positions and refined using a riding model. The disordered guest molecules could not be located successfully from fourier maps, and the highly disordered lattice guest molecules were removed using the SQUEEZE procedure by PLATON.<sup>3</sup> Selected crystal parameters and refinement are summarized in Table S6. The numbers of CCDC are 2364863 and 2364864. These data are provided free of charge by the Cambridge Crystallographic Data Centre.

In addition, the crystal quantity of Guests@DCF-20 and Guests@LCF-20 are good, and they are suitable to X-ray single crystal diffraction, however, only the host structure can be resolved, no lattice diffraction of guest molecules can be confirmed. This can be attributed to two factors, one the one hand, the guest molecules into the pores still own molecular vibration, further present the structure disorder, one the other hand, the integrity of guest is low resulting from the restrictions of crystallography occupancy.

Besides, although many efforts have been tried, we could not obtain the guest-loaded crystal structure. However, the guest-loaded crystals also keep the intact morphology and crystallinity, we could obtain the accurate structure of the host framework by single crystal X-ray diffraction.

#### 1.4 The loading amounts of guests

The loading amounts of guest dyes in compounds were determined by fluorescence spectra. For example, the fluorescence intensity-concentration relationship was adopted. The luminescent intensities of different concentrations of C152 in DMA solution were measured and repeated five times, and then the average values were calculated, respectively. Therefore, the relationship for the emission intensity-concentration of C152 in DMA solution could be obtained. 10 mg dye-encapsulated C152@MOFs were dissolved in 2 mL DMA solution, which was achieved by adding HCl (0.25 mL, 37%) to obtain clear solution, then the emission intensity of the mixture solution was measured under the same condition. Through combining the function of C152 pure solution and the intensity of C152 from composition, we could obtain the specific loading capacity of C152 at each concentration gradient (Figure S21-24).

#### 1.5 Theoretical simulation

The density functional theory (DFT) calculations were performed using a Dmol3 module of Material Studio 2020.<sup>4</sup> The generalized gradient approximation (GGA) method with Perdew-Burke-Ernzerhof (PBE) function was employed to describe the interactions between core and electrons. The force and energy convergence criterion were set to 0.002 Ha Å<sup>-1</sup> and 10<sup>-5</sup> Ha, respectively. When the optimization was completed, the ESP and Mulliken charge calculations were performed.

The binding energy ( $\Delta E$ ) was calculated as

$$\Delta E(\text{eV}) = 27.212 \cdot (E_{\text{total}}(\text{Ha}) - E_1(\text{Ha}) - E_2(\text{Ha}))$$

where the  $E_{\text{total}}$  is the energy of the optimized system;  $E_1$  is the energy of the material;  $E_{\text{molecule}}$  is the energy of micromolecule.

The coordinate sites were listed in Table S7 and S8.

## 1.6 The CD and CPL measurements of MOFs

CD spectra was measured on a JASCO J-810 spectrophotometer. The samples were prepared by using the method for infrared measurement. A mixture of MOFs and KBr (crystal/KBr 1:400, weight ratio, total weight of 100 mg) was finely ground and pressed into a transparent pellet with a diameter of 13 mm. The pellet was directly used for measurement of CD. The wavelength and bandwidth of the monochromator were set to 280.0 and 1.0 nm, and the time-per-point of each sampling point was 0.5 s.

CPL spectra for all samples were recorded on a JASCO CPL-300 spectrophotometer in the solid state with scanning speed. The basic mode is used. Ex slit width, Em slit width, and accumulations of  $100 \text{ nm min}^{-1}$ , 2000  $\mu\text{m}$ , 2000  $\mu\text{m}$ , and 2, respectively. The excitation wavelength was 280 nm and the DV values were about 0.5 V for DCF-20/LCF-20 and the corresponding wavelengths for Guests@DCF-20 and Guests@LCF-20.

## 1.7 The preparation of WLED

For the UV-pumped white LED, the grounded WD-5 were blended with (Polymethyl Methacrylate) PMMA to form a well-distributed mixture; then, the composite was coated on the surface of a 365 nm UV LED chip and cured for 30 min at room temperature.

## 2. Other figures and data

**Table S1.** The results of crystal parameter under different molar ratio of 4-PPD and D-cam.

| Molar ratio | 4-HPPD (mg) | D-cam (mg) | Solution | Space group |
|-------------|-------------|------------|----------|-------------|
| 1:5         | 15          | 100        | 4:2:1    | $P4_12_12$  |
| 1:10        | 7.5         | 100        | 4:2:1    | $P4_12_12$  |
| 1:10        | 15          | 200        | 8:4:2    | $P4_12_12$  |
| 1:20        | 8           | 200        | 4:2:1    | $P4_12_12$  |

Solution: DMA:EtOH:H<sub>2</sub>O (mL:mL:mL)

The effect of stoichiometric ratio was preliminary investigated, it can find that the space group has no inversion and change.

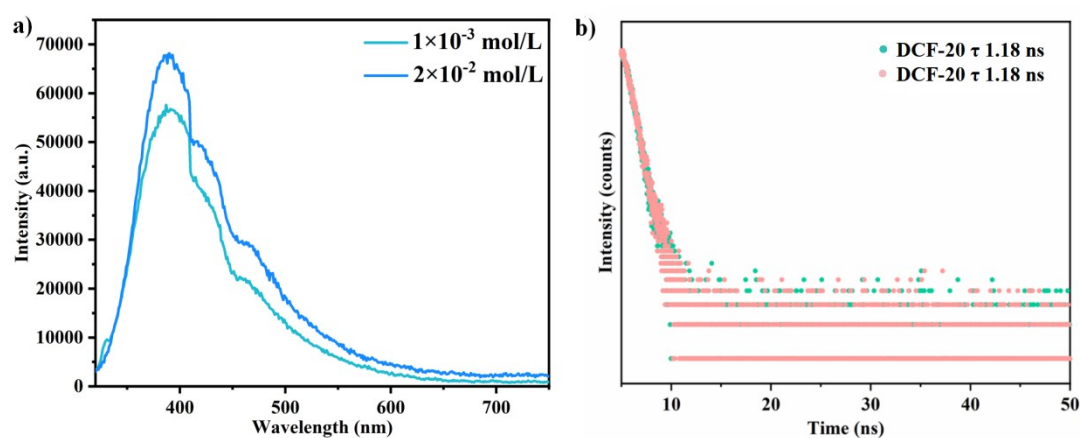

**Figure S1.** (a) The emission of 4-HPPD in DMA; (b) the delayed lifetimes of DCF-20 and LCF-20.

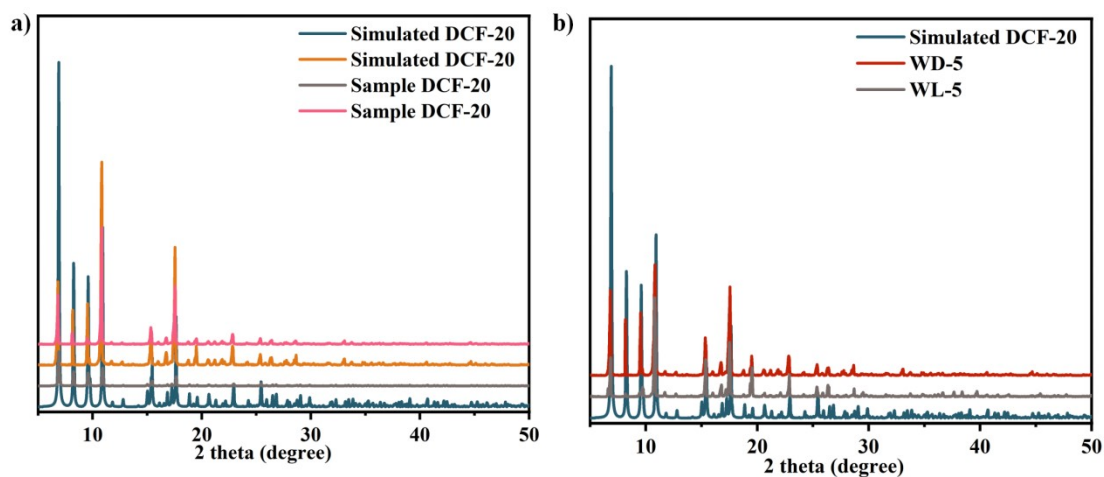

**Figure S2.** (a) PXR D patterns of as-synthesized DCF-20 and LCF-20; (b) PXR D of WD-5 and WL-5 with white-lighting emission. All simulated patterns are calculated from the corresponding single-crystal structures. Test conditions: working voltage and current is 40 kV and 40 mA, respectively.

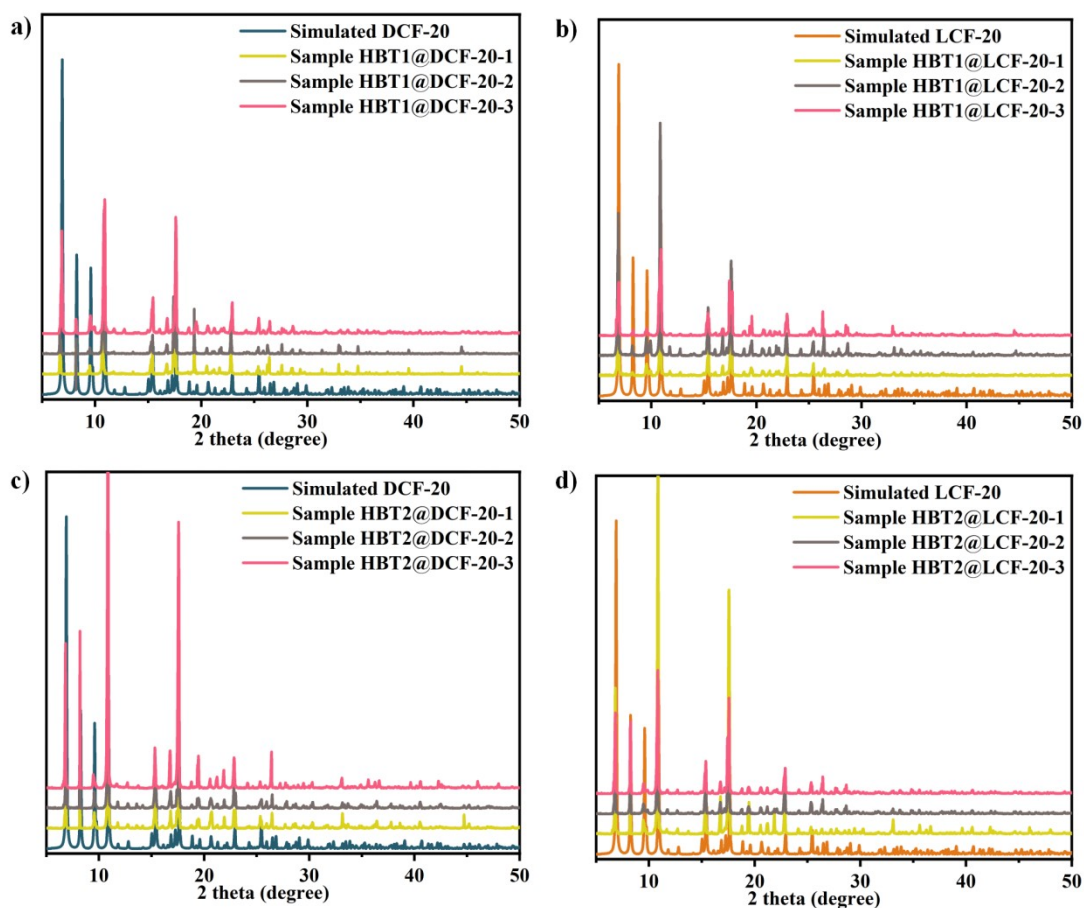

**Figure S3.** (a,b) PXR D patterns of as-synthesized HBT1@DCF-20 and HBT1@LCF-20; (c,d) PXR D of HBT2@DCF-20 and HBT2@LCF-20.

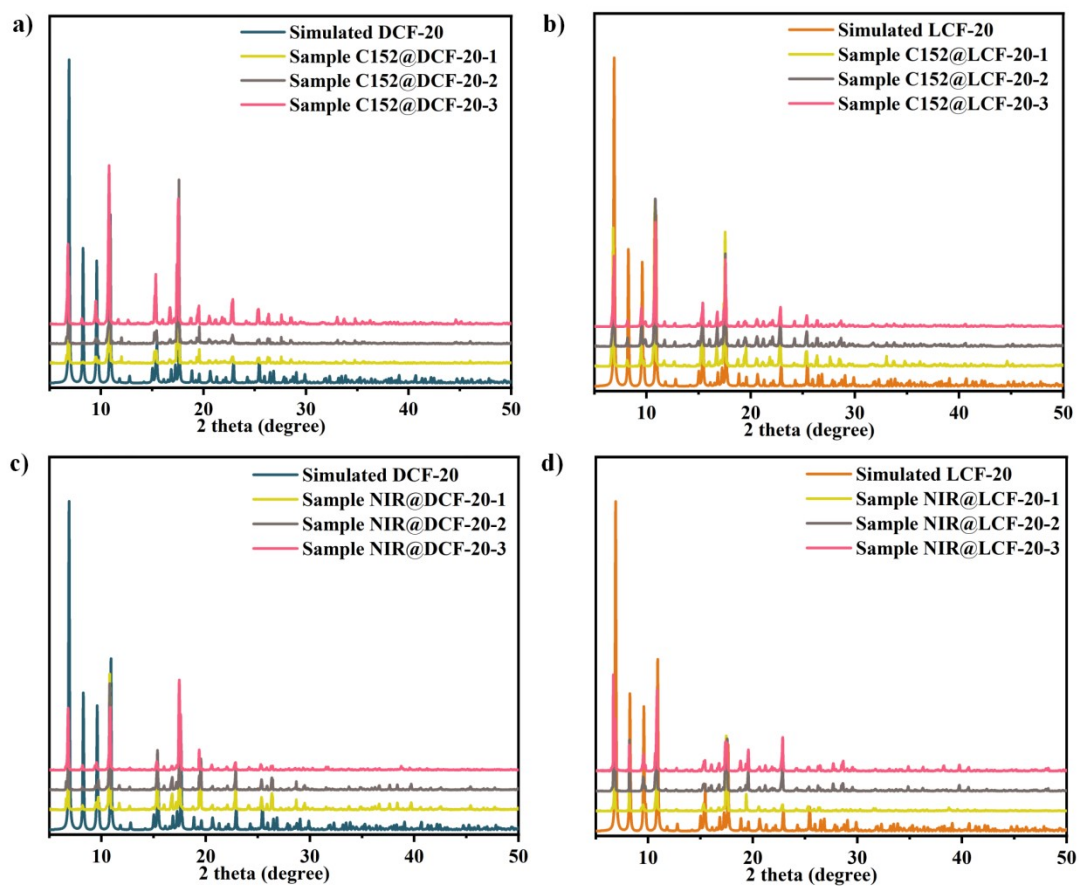

**Figure S4.** (a,b) PXRD patterns of as-synthesized C152@DCF-20 and C152@LCF-20; (c,d) PXRD of NIR@DCF-20 and NIR@LCF-20.

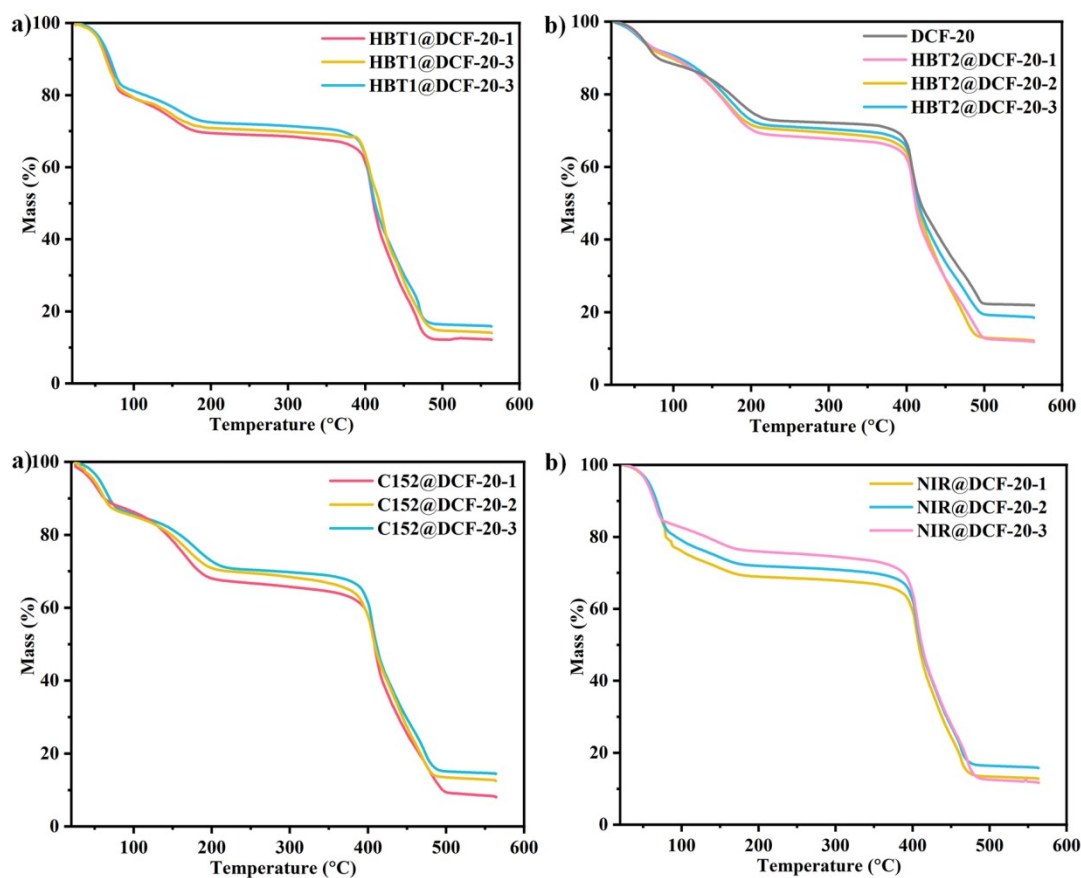

**Figure S5.** Thermogravimetric analysis of guests@MOFs. (a) HBT1@DCF-20/HBT1@LCF-20; (b) HBT2@DCF-20/HBT2@LCF-20; (c) C152@DCF-20/C152@LCF-20; (d) NIR@DCF-20/NIR@LCF-20.

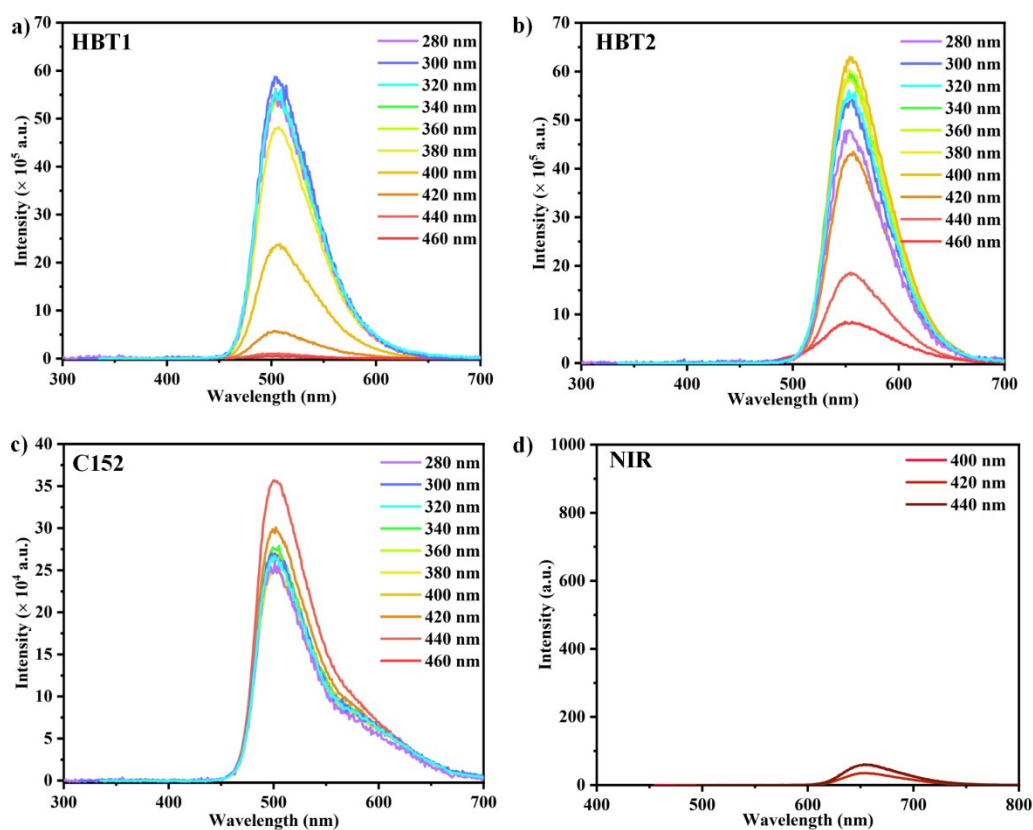

**Figure S6.** The emission behaviors of guest emitters under different excitation wavelength. (a) HBT1; (b) HBT2; (c) C152; (d) NIR.

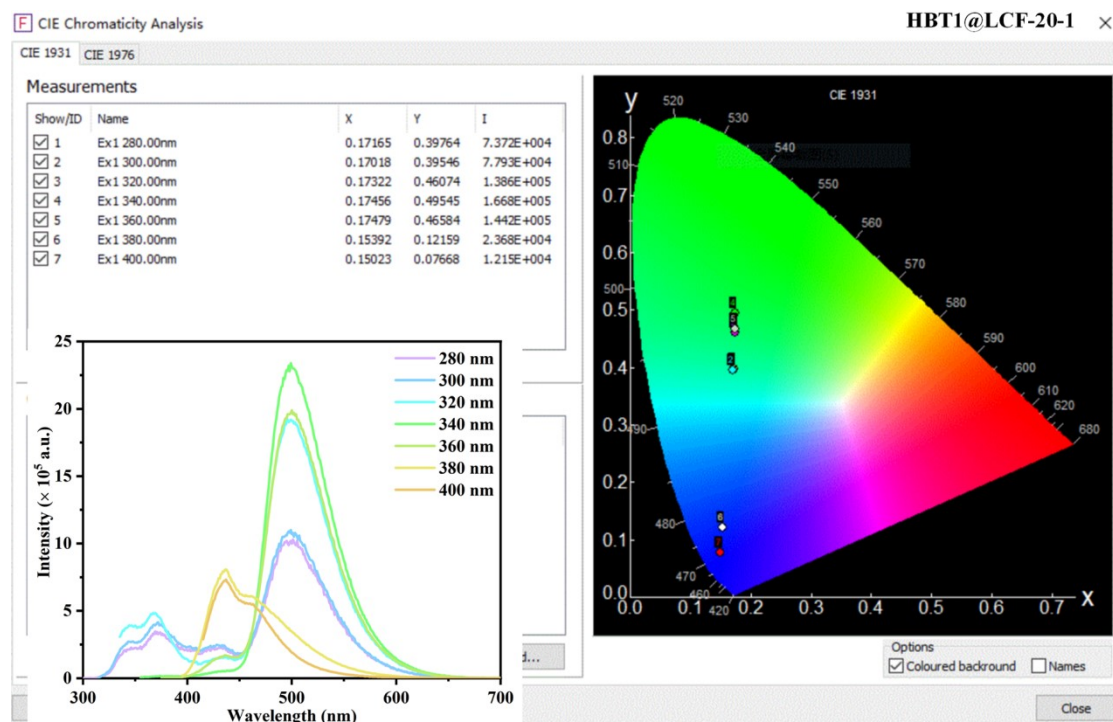

**Figure S7.** The emission behaviors including emission peaks and CIE coordinates of HBT1@LCF-20-1.



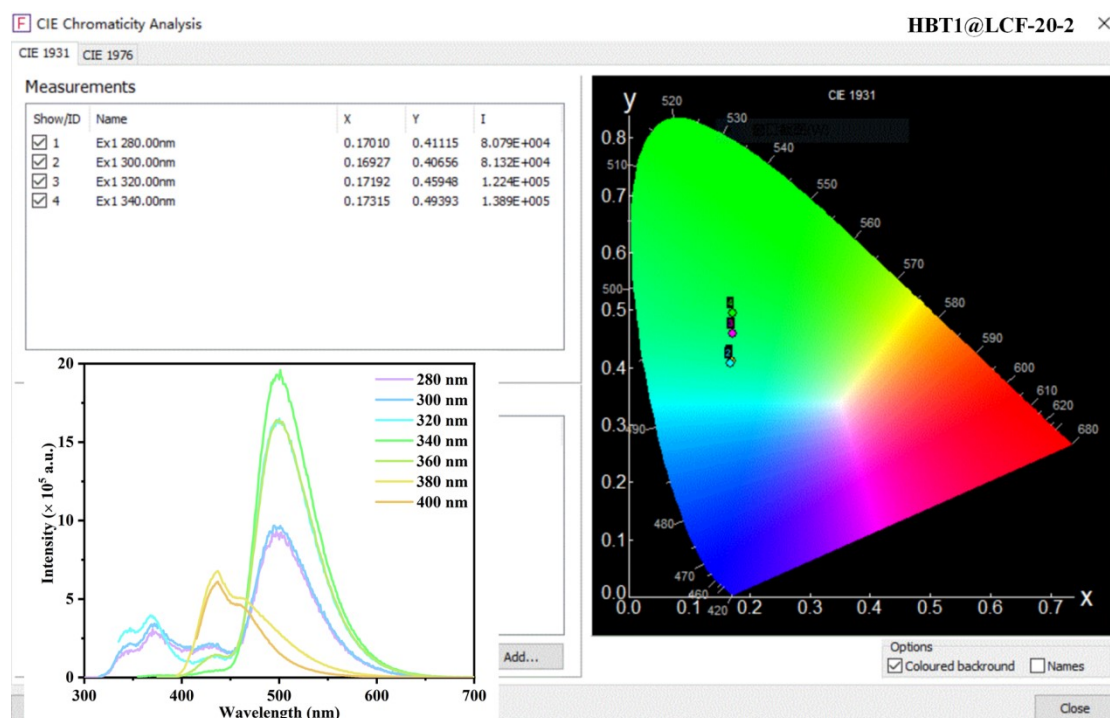

**Figure S8.** The emission behaviors including emission peaks and CIE coordinates of HBT1@LCF-20-2.

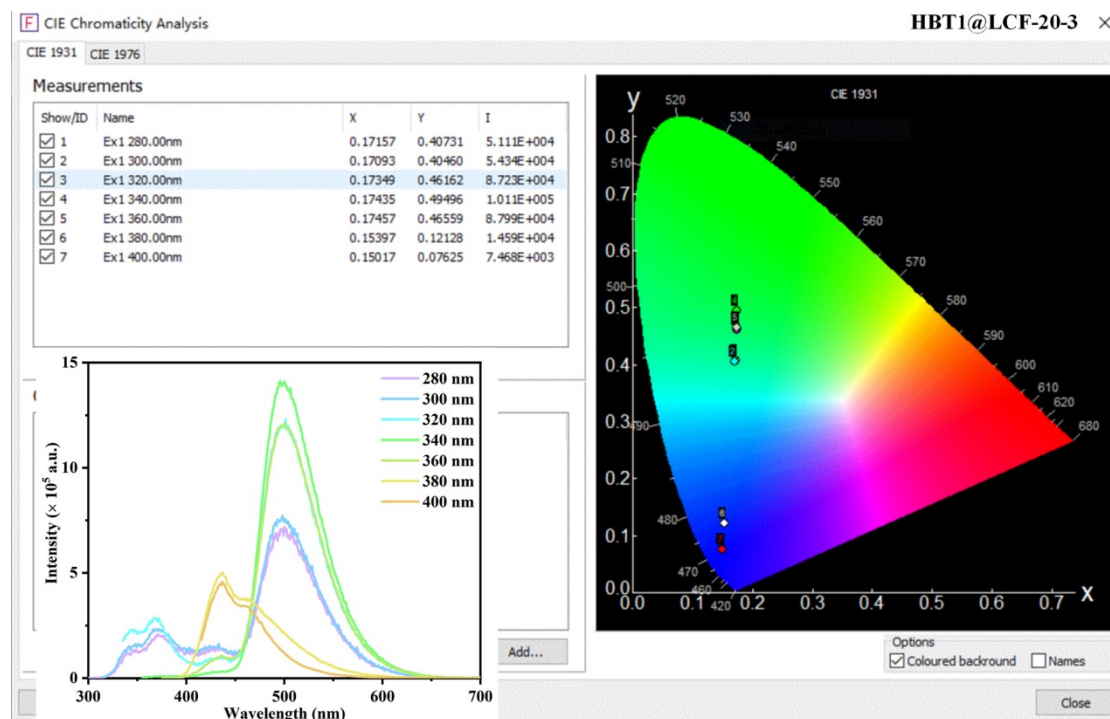

**Figure S9.** The emission behaviors including emission peaks and CIE coordinates of HBT1@LCF-20-3.

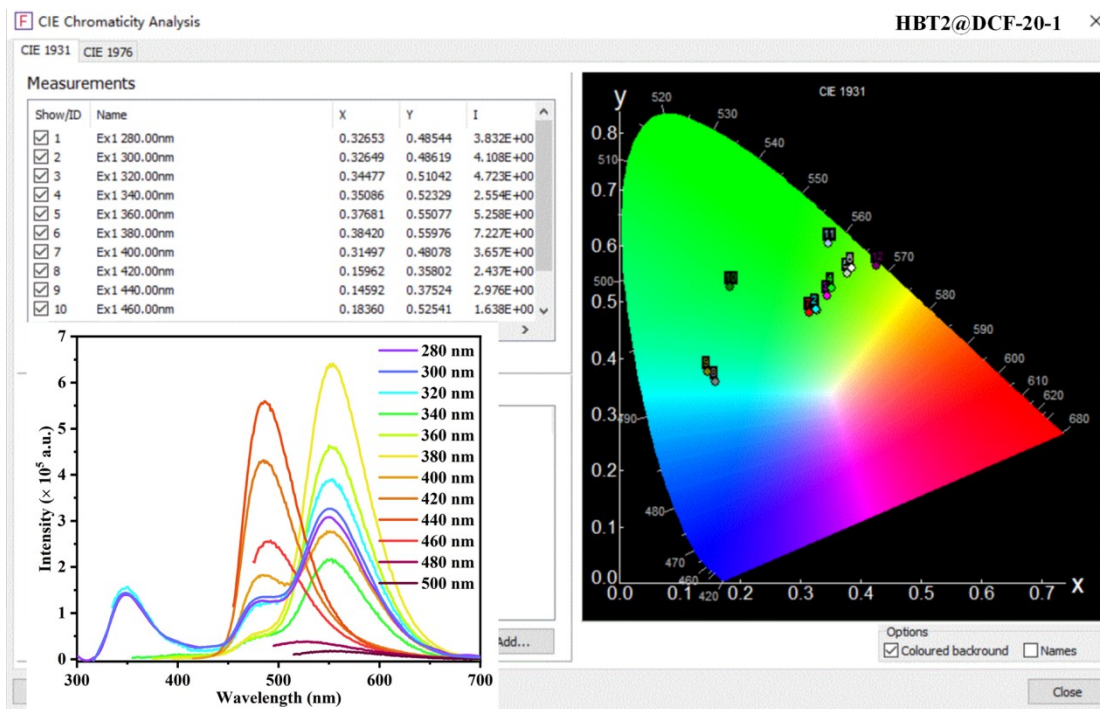

**Figure S10.** The emission behaviors including emission peaks and CIE coordinates of HBT2@DCF-20-1.

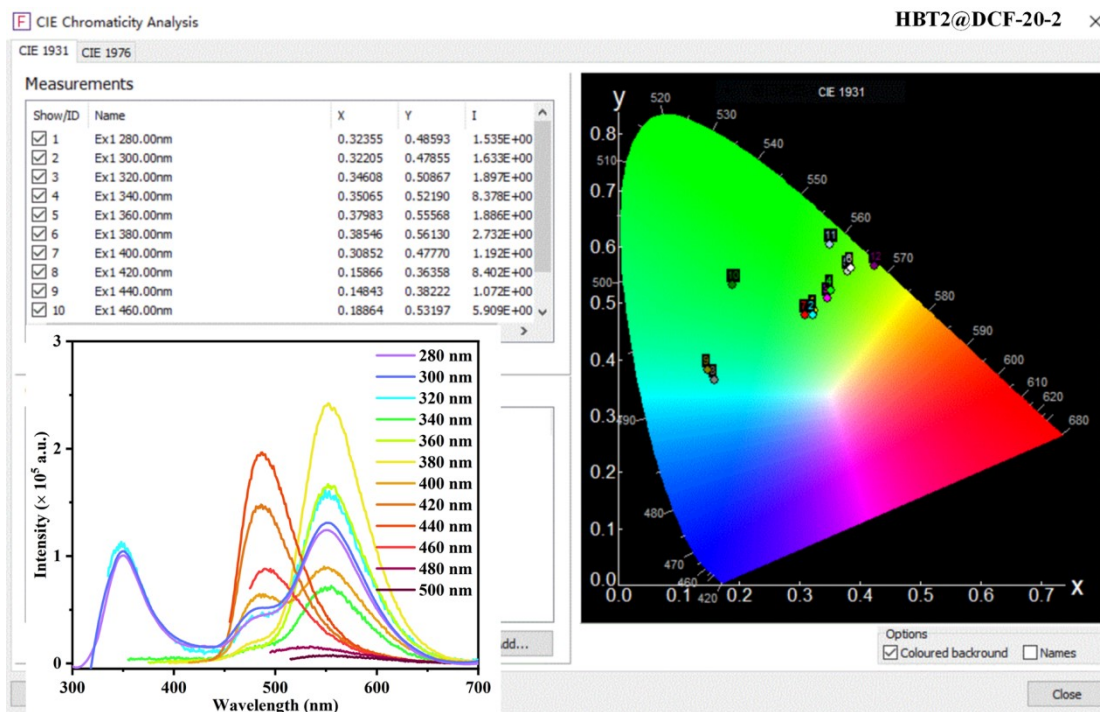

**Figure S11.** The emission behaviors including emission peaks and CIE coordinates of HBT2@DCF-20-2.

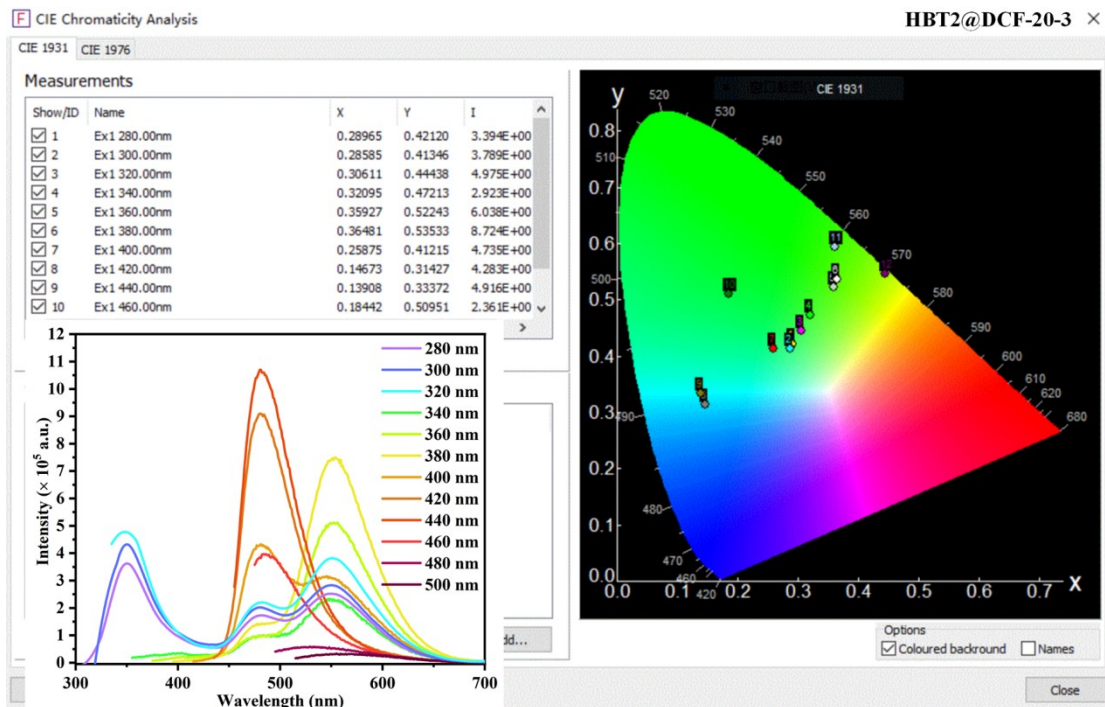

**Figure S12.** The emission behaviors including emission peaks and CIE coordinates of HBT2@DCF-20-3.

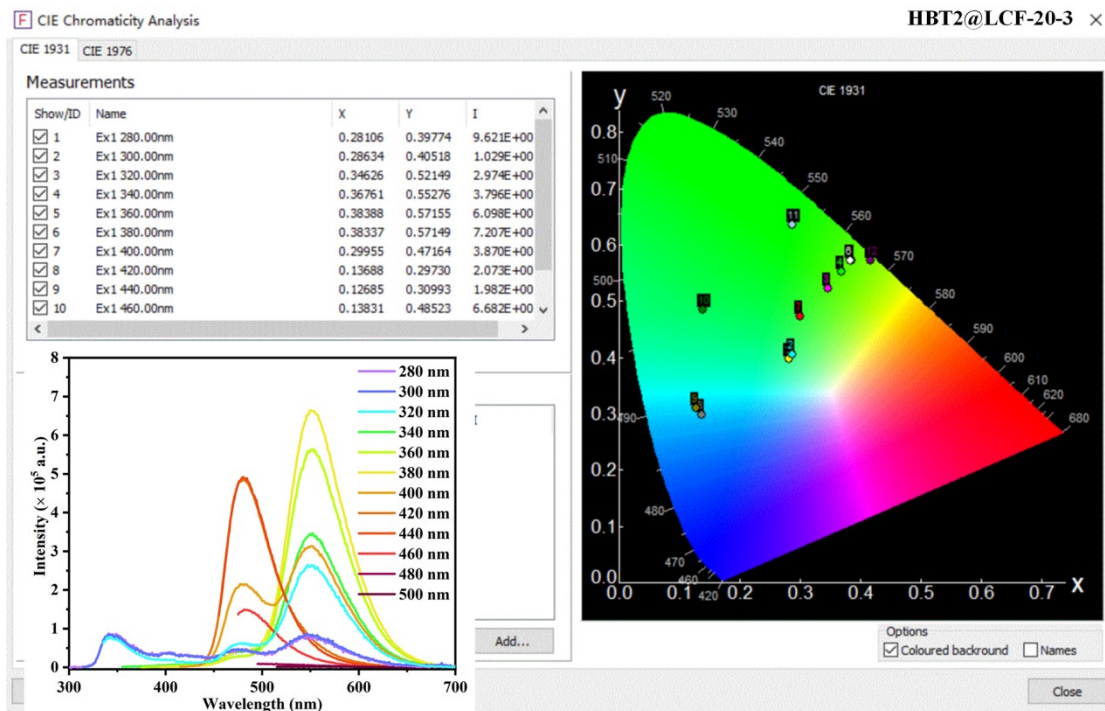

**Figure S13.** The emission behaviors including emission peaks and CIE coordinates of HBT2@LCF-20-3.

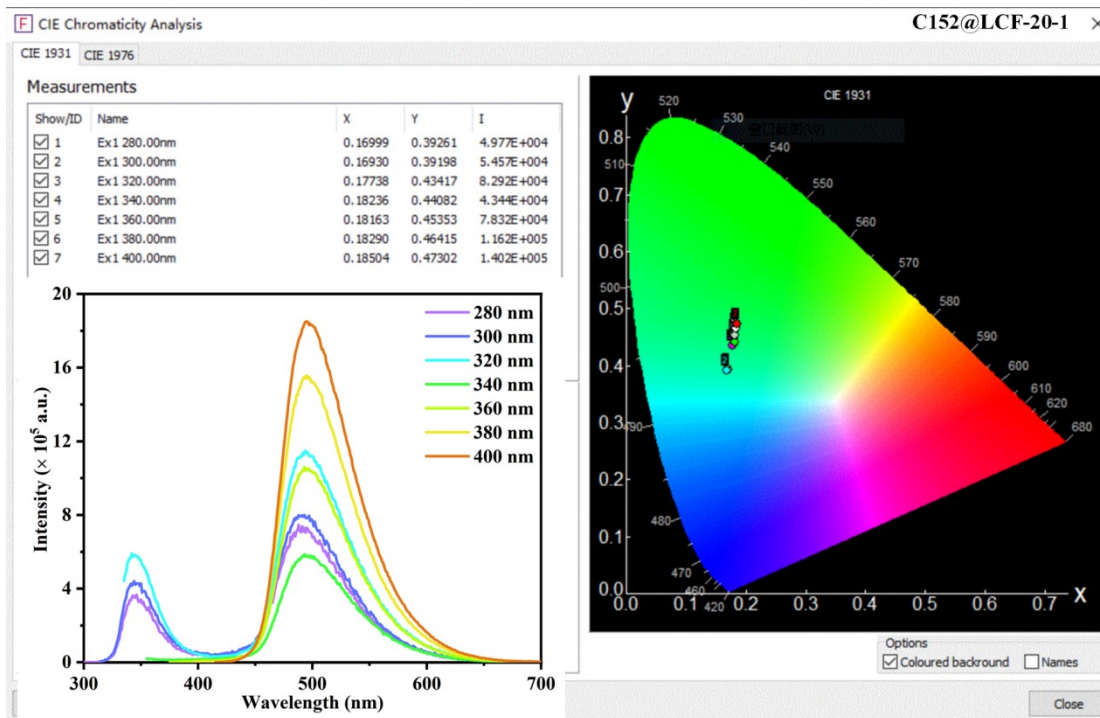

**Figure S14.** The emission behaviors including emission peaks and CIE coordinates of C152@LCF-20-1.

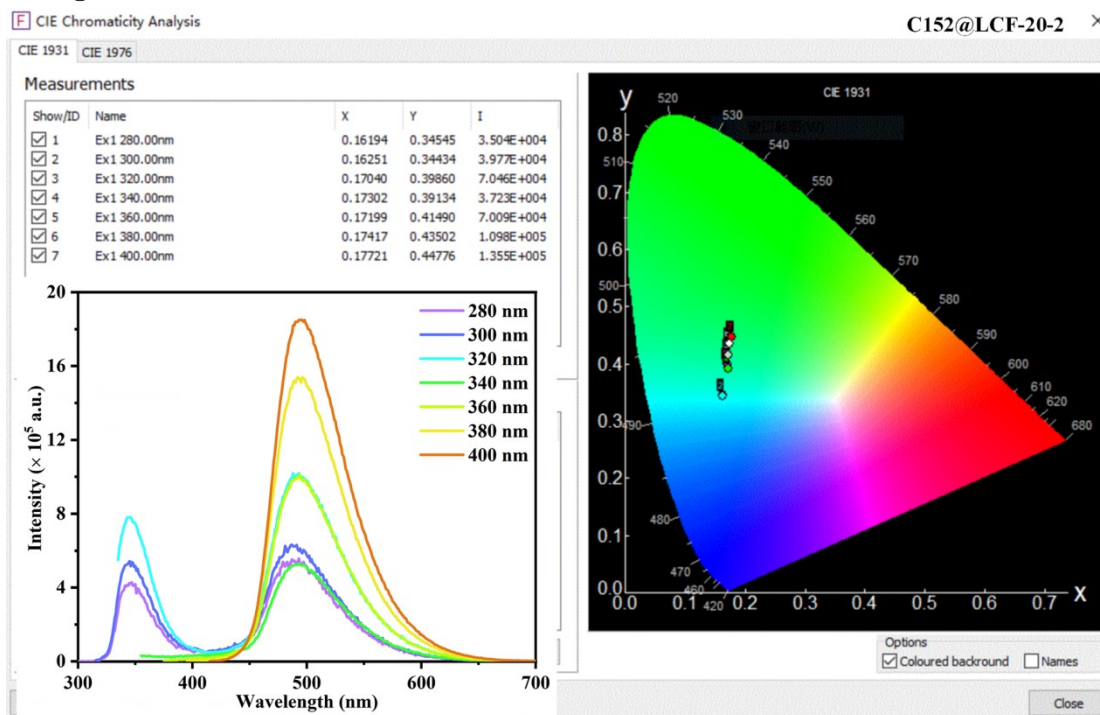

**Figure S15.** The emission behaviors including emission peaks and CIE coordinates of C152@LCF-20-2.

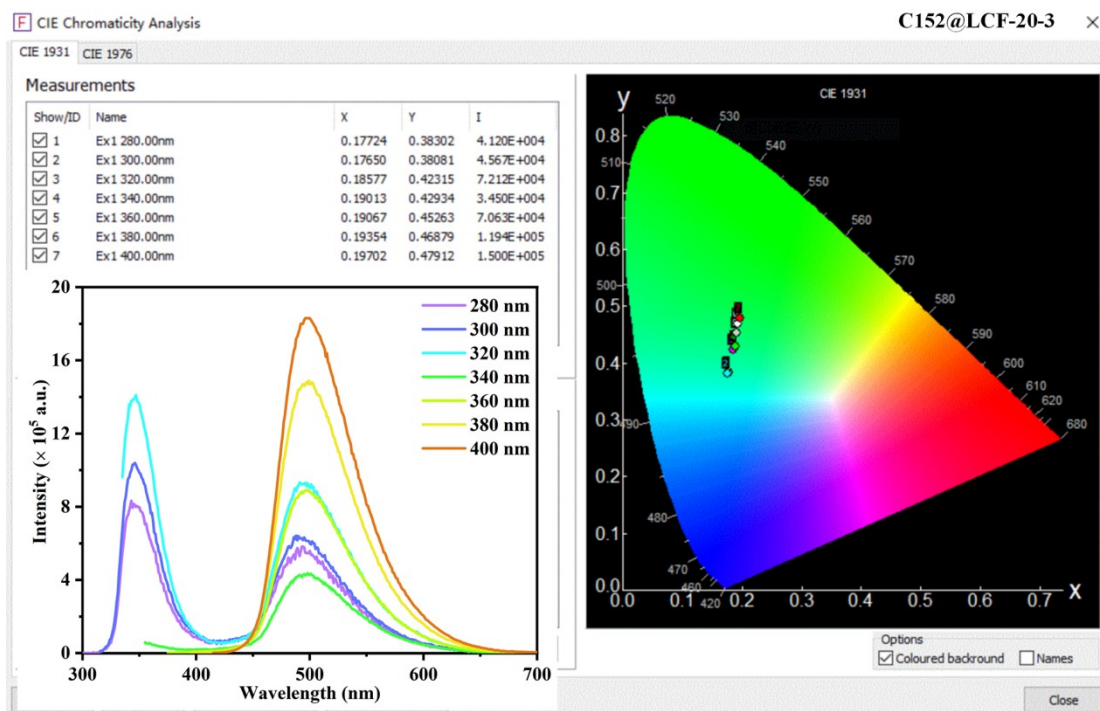

**Figure S16.** The emission behaviors including emission peaks and CIE coordinates of C152@LCF-20-3.

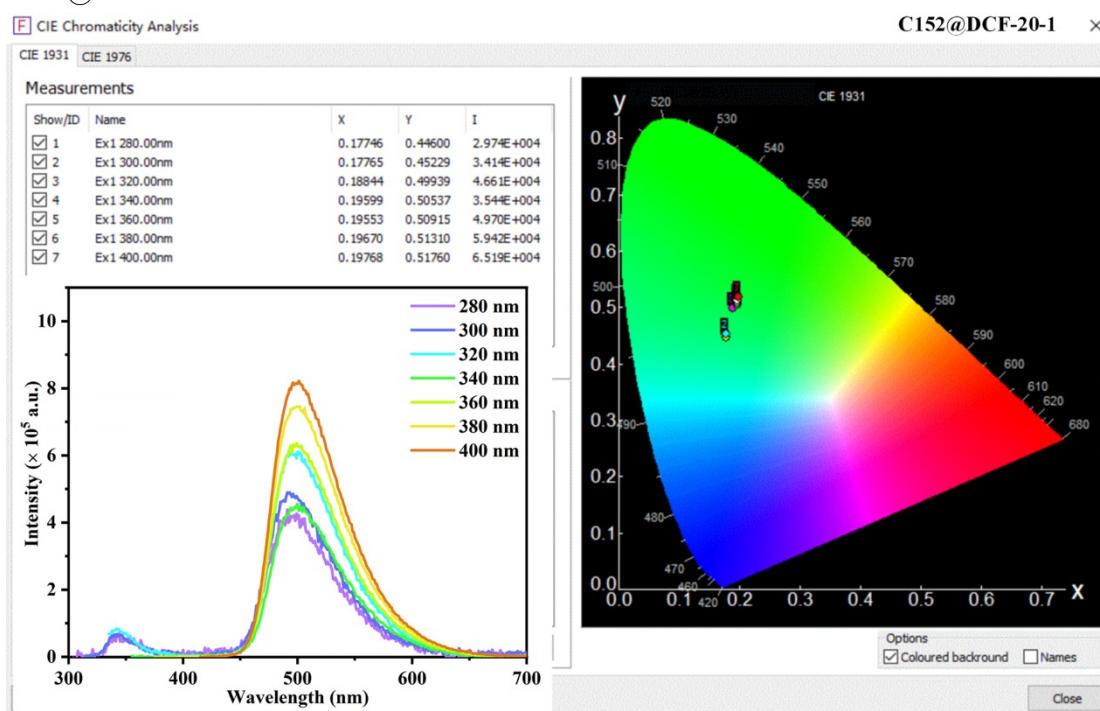

**Figure S17.** The emission behaviors including emission peaks and CIE coordinates of C152@DCF-20-1.

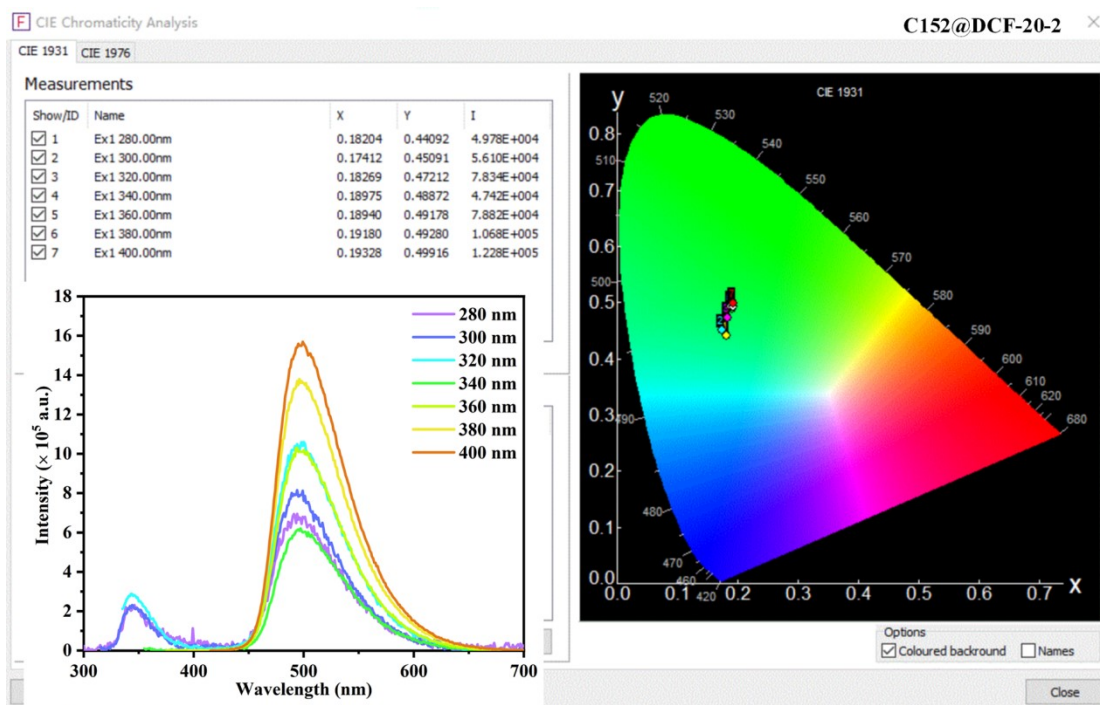

**Figure S18.** The emission behaviors including emission peaks and CIE coordinates of C152@DCF-20-2.

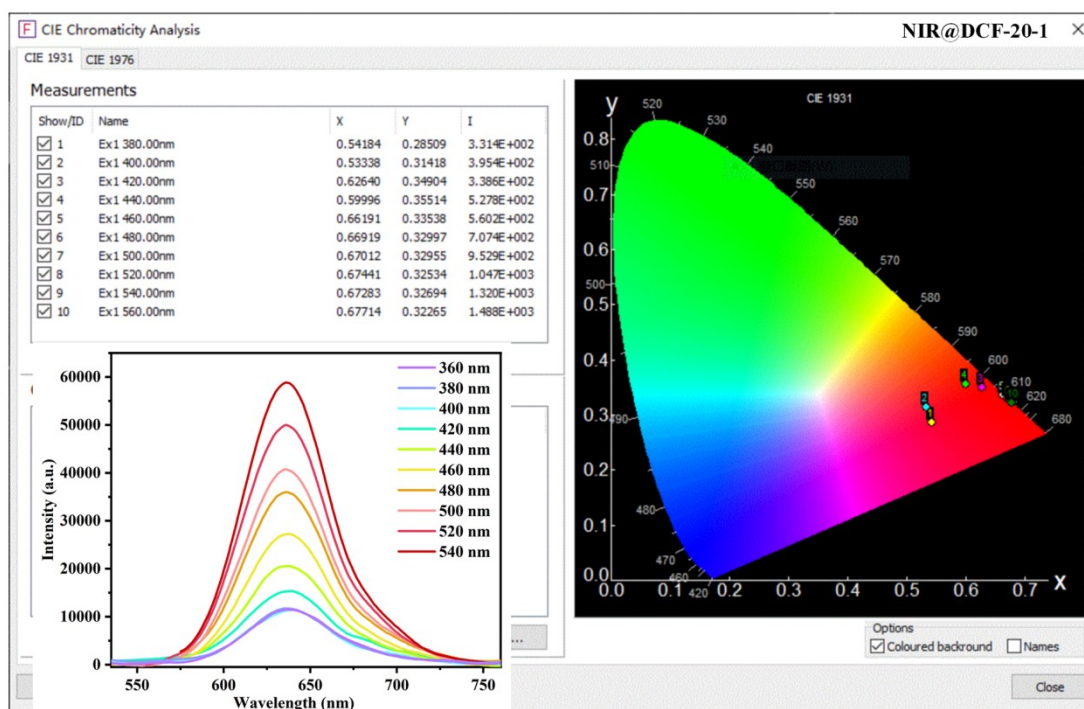

**Figure S19.** The emission behaviors including emission peaks and CIE coordinates of NIR@DCF-20-1.

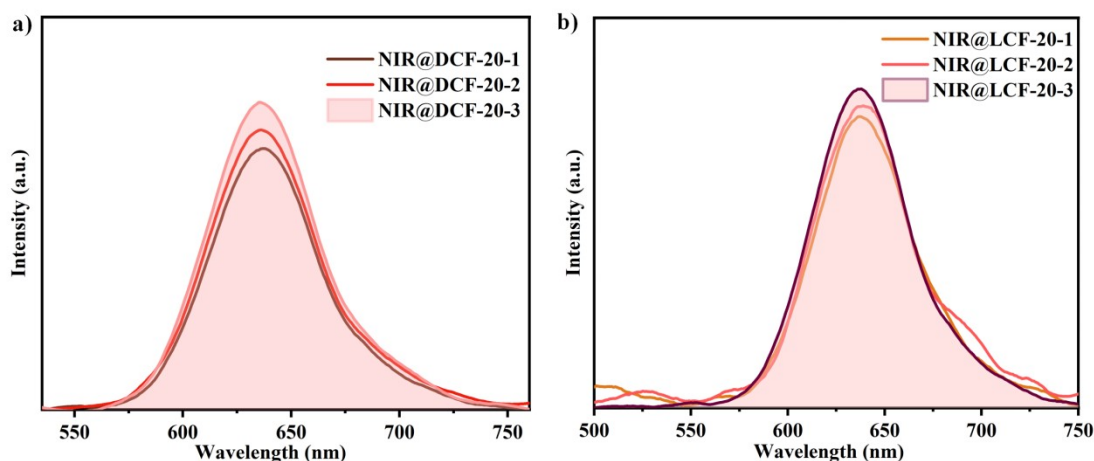

**Figure S20.** The emission behaviors including emission peaks and CIE coordinates of NIR@DCF-20 and NIR@LCF-20.

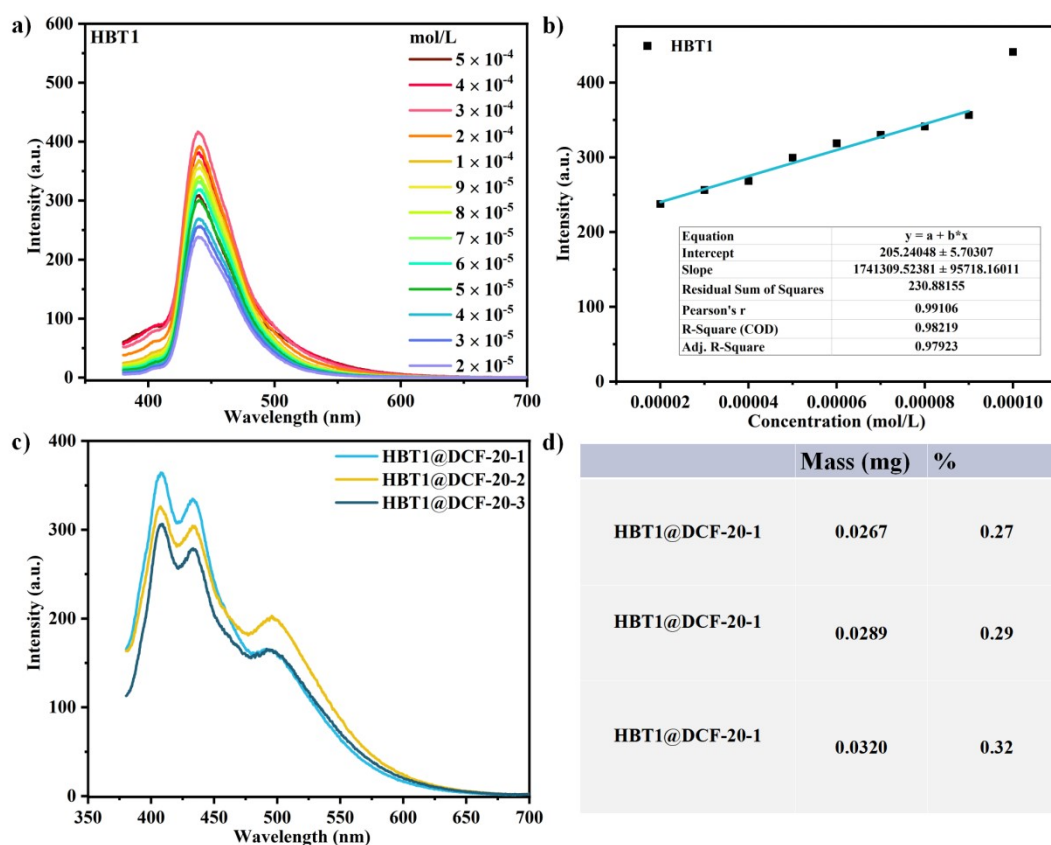

**Figure S21.** (a) The emission intensity of HBT1 in DMA solution with different concentrations; (b) the relationship for the intensity-concentration of HBT1 in DMA solution could be obtained; (c) HBT1@DCF-20 (10 mg) crystal sample was decomposed in DMA (2 mL) with HCl (0.25 mL, 37%); (d) the final amounts of HBT1 in host framework.

When the data at 375 nm was adopted, the below equation can be obtained, as follows:

**Equation S1:**  $Y = 1741309.5X + 205.24$  (cyan fitting line), the concentration of HBT1 is below  $1 \times 10^{-4}$  mol/L.

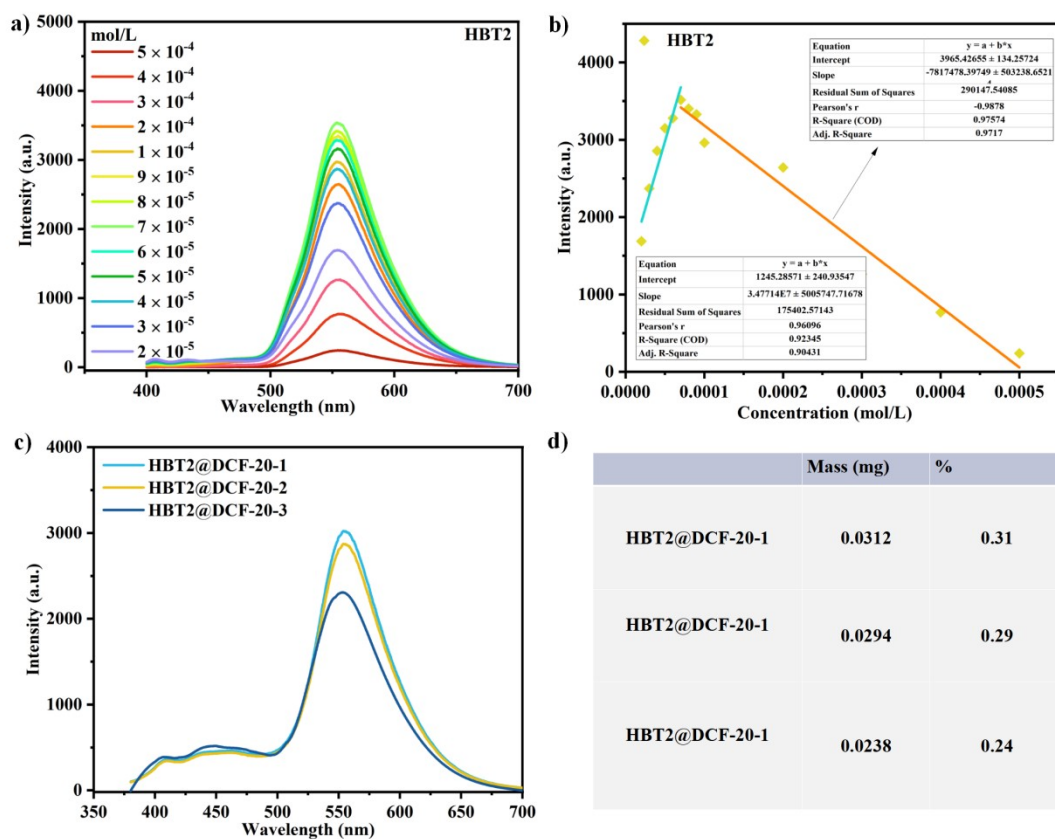

**Figure S22.** (a) The emission intensity of HBT2 in DMA solution with different concentrations; (b) the relationship for the intensity-concentration of HBT2 in DMA solution could be obtained; (c) HBT2@DCF-20 (10 mg) crystal sample was decomposed in DMA (2 mL) with HCl (0.25 mL, 37%); (d) the final amounts of HBT2 in host framework.

When the intensity at 550 nm was adopted, the below equation can be obtained, as follows:

**Equation S1:**  $Y = 3.47714E7X + 1245.28571$  (cyan fitting line), the concentration of HBT2 is below  $1 \times 10^{-4}$  mol/L.

**Equation S2:**  $Y = -7817478.39749X + 3965.42655$  (orange fitting line). The concentration of HBT2 ranges from  $1 \times 10^{-4}$  to  $1 \times 10^{-3}$  mol/L.



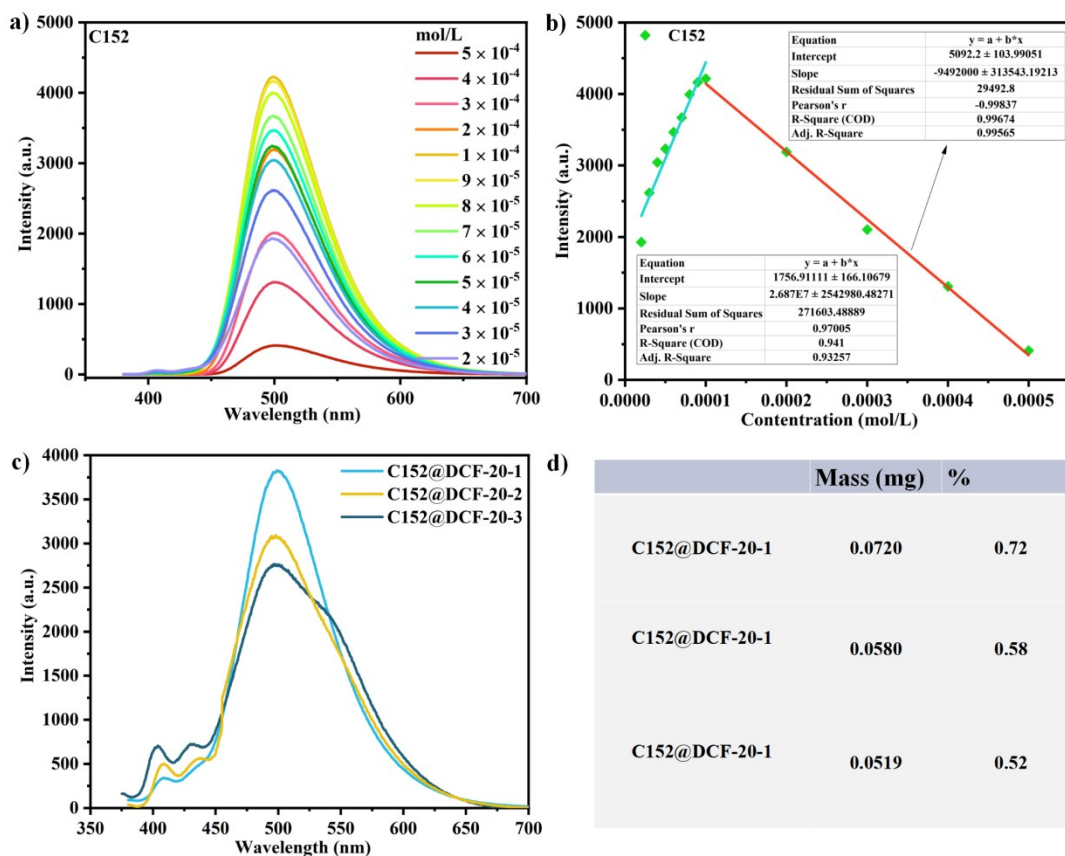

**Figure S23.** (a) The emission intensity of C152 in DMA solution with different concentrations; (b) the relationship for the intensity-concentration of C152 in DMA solution could be obtained; (c) C152@DCF-20 (10 mg) crystal sample was decomposed in DMA (2 mL) with HCl (0.25 mL, 37%); (d) the final amounts of C152 in host framework.

When the data at 500 nm was adopted, the below equation can be obtained, as follows:

**Equation S1:**  $Y = 2.687E7X + 1756.91111$  (cyan fitting line), the concentration of C152 is below  $1 \times 10^{-4}$  mol/L.

**Equation S2:**  $Y = -9492000X + 5092.2$  (orange fitting line). The concentration of C152 ranges from  $1 \times 10^{-4}$  to  $1 \times 10^{-3}$  mol/L.

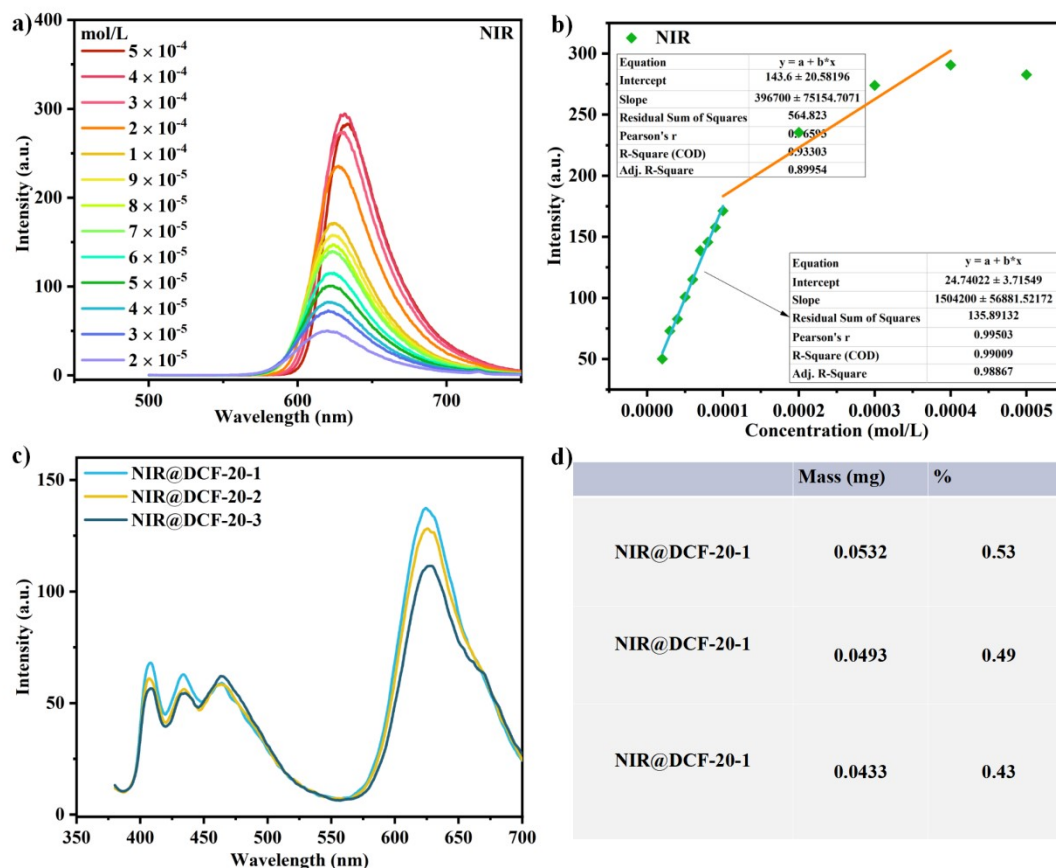

**Figure S24.** (a) The emission intensity of NIR in DMA solution with different concentrations; (b) the relationship for the intensity-concentration of NIR in DMA solution could be obtained; (c) NIR@DCF-20 (10 mg) crystal sample was decomposed in DMA (2 mL) with HCl (0.25 mL, 37%); (d) the final amounts of NIR in host framework.

When the data at 640 nm was adopted, the below equation can be obtained, as follows:

**Equation S1:**  $Y = 1504200X + 24.74022$  (cyan fitting line), the concentration of NIR is below  $1 \times 10^{-4}$  mol/L.

**Equation S2:**  $Y = 396700X + 143.6$  (orange fitting line). The concentration of NIR ranges from  $1 \times 10^{-4}$  to  $1 \times 10^{-3}$  mol/L.

**Table S2.** The quantum yields of Guests@MOFs.

|               | $\Phi_f(100\%)$ |               | $\Phi_f(100\%)$ |
|---------------|-----------------|---------------|-----------------|
| HBT1@DCF-20-1 | 24.32           | HBT2@DCF-20-1 | 62.31           |
| HBT1@DCF-20-2 | 22.31           | HBT2@DCF-20-2 | 58.32           |
| HBT1@DCF-20-3 | 21.35           | HBT2@DCF-20-3 | 57.98           |
| HBT1@LCF-20-1 | 22.31           | HBT2@LCF-20-1 | 61.32           |
| HBT1@LCF-20-2 | 20.13           | HBT2@LCF-20-2 | 59.00           |
| HBT1@LCF-20-3 | 20.01           | HBT2@LCF-20-3 | 57.31           |

**Table S3.** The quantum yields of Guests@MOFs.

|               | $\Phi_f(100\%)$ |              | $\Phi_f(100\%)$ |
|---------------|-----------------|--------------|-----------------|
| C152@DCF-20-1 | 68.01           | NIR@DCF-20-1 | 22.36           |
| C152@DCF-20-2 | 68.12           | NIR@DCF-20-2 | 23.25           |
| C152@DCF-20-3 | 67.32           | NIR@DCF-20-3 | 21.46           |
| C152@LCF-20-1 | 69.22           | NIR@LCF-20-1 | 23.25           |
| C152@LCF-20-2 | 68.23           | NIR@LCF-20-2 | 21.33           |
| C152@LCF-20-3 | 68.19           | NIR@LCF-20-3 | 29.25           |

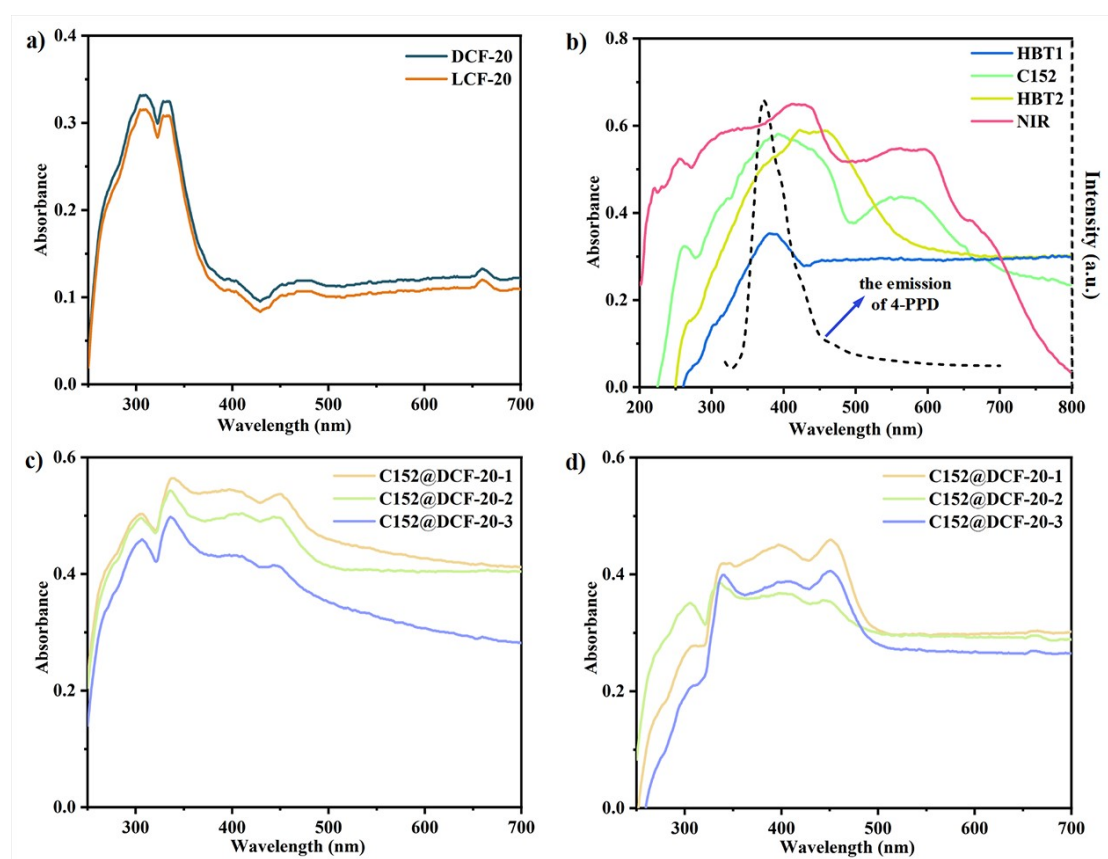**Figure S25.** (a) The solid state UV-vis absorption spectrum of DCF-20/LCF-20; (b) the solid state UV-vis absorption spectra of four guests and the emission of 4-HPPD; (c) the solid state UV-vis absorption spectra of C152@DCF-20; (d) the solid state UV-vis absorption spectra of C152@LCF-20.

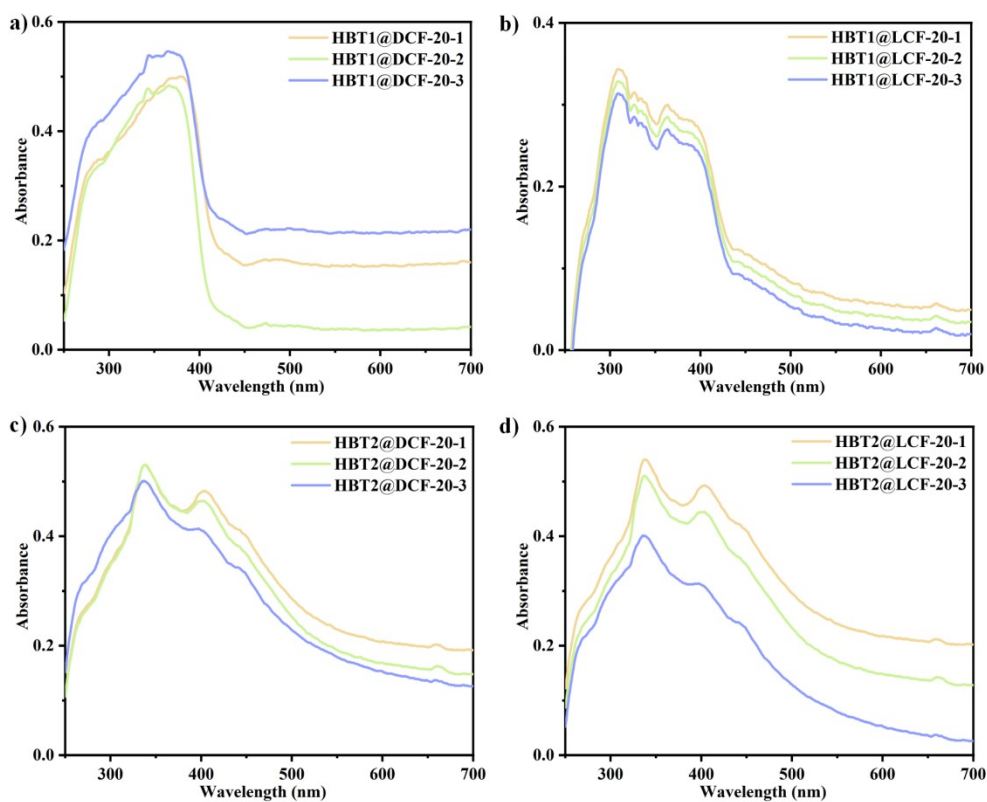

**Figure S26.** The solid state UV-vis absorption spectrum of HBT1@DCF-20/HBT1@LCF-20, and HBT2@DCF-20/HBT2@LCF-20.

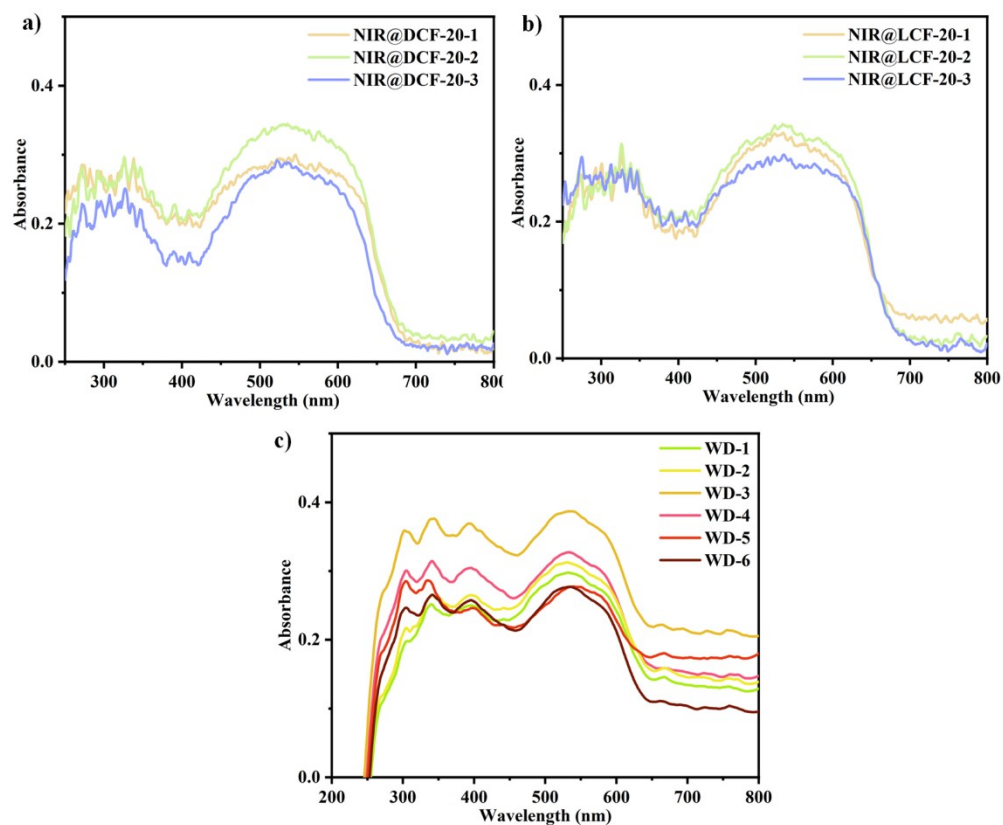

**Figure S27.** The solid state UV-vis absorption spectrum of NIR@DCF-20/NIR@LCF-20,

and WD-1 to WD-6.

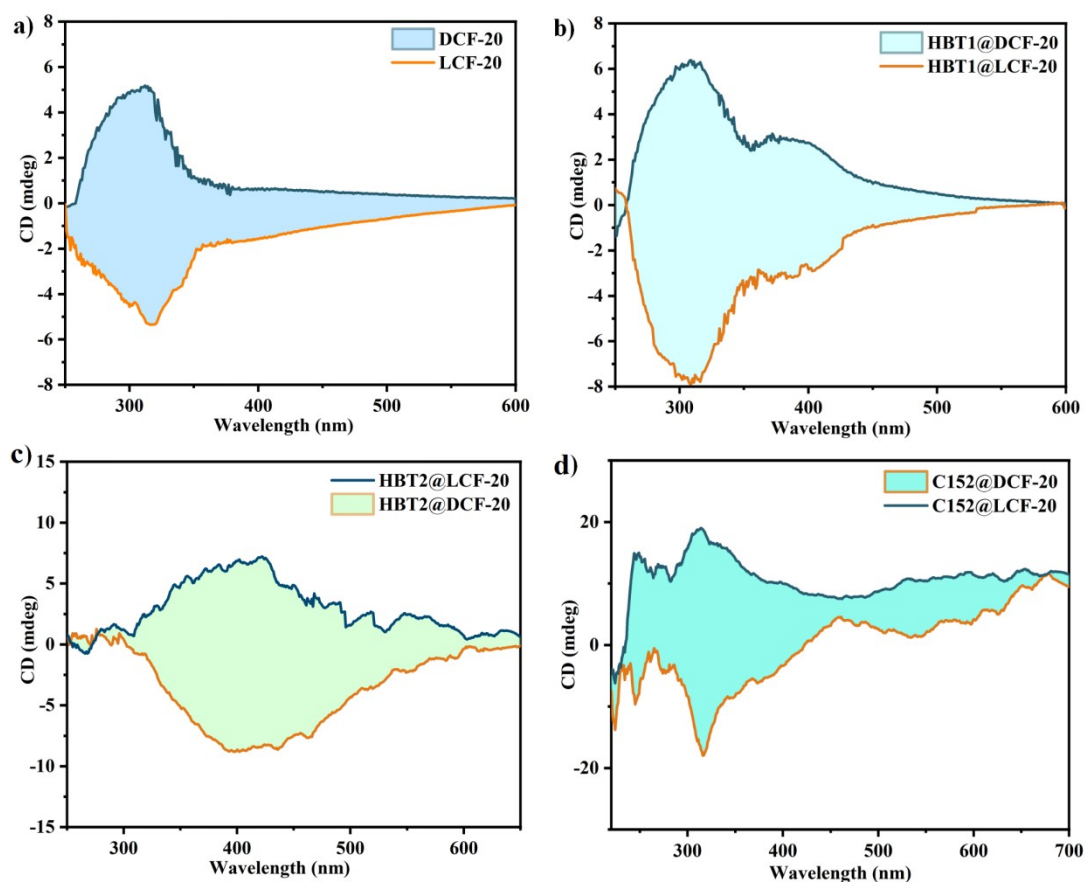

**Figure S28.** (a) CD spectra of DCF-20/LCF-20; (b) HBT1@DCF-20/HBT1@LCF-20; (c) HBT1@DCF-20/HBT1@LCF-20; (d) C152@DCF-20/C152@LCF-20.

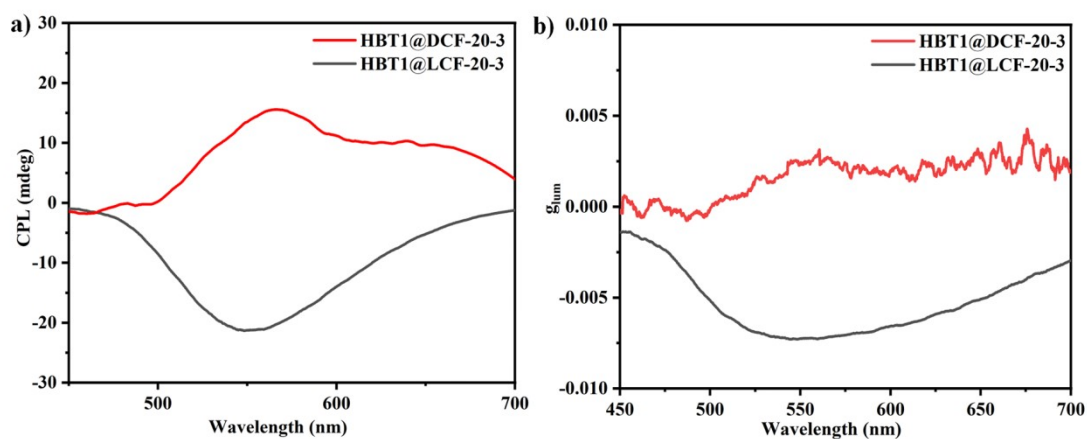

**Figure S29.** CPL and glum of HBT1@DCF-20 and LCF-20 under 360 nm excitation.

**Table S4.** A summary of reported host-guest MOFs-based CPL materials.

| Entry | MOFs                | Guests                | Emission (nm)        | $g_{lum} (\times 10^{-3})$                            | Ref.                                             |
|-------|---------------------|-----------------------|----------------------|-------------------------------------------------------|--------------------------------------------------|
| 1     | Chiral ZIF-8        | dyes                  | 505,578              | $\pm 0.3, \pm 1.2$                                    | <i>Angew. Chem. Int. Ed.</i> 2019, 58, 4978–4982 |
| 2     | CD-HF               | PyC-                  | 500                  | 3.5                                                   | <i>J. Am. Chem. Soc.</i> 2022, 144, 9380–9389    |
| 3     | P-/M-Et(Cd)         | o/p/m-PhF             | 512,507,513          | -8.3/8.4, -8.3/8.7, -8.4/8.6                          | <i>Adv. Sci.</i> 2023, 10, 2207333               |
| 4     | (P-(+)/M-(-)-TbBTC) | DSM                   | 615                  | +2.1/-1.3                                             | <i>Chem. Sci.</i> 2020, 11, 9154–9161            |
| 5     | DCF/LCF-12          | pyrene                | 612                  | -3.7/+5.1                                             | <i>Adv. Funct. Mater.</i> 2023, 33, 2300105      |
| 6     | SURchirMOF          | Ln(acac) <sub>3</sub> | 550                  | +8.5/-8.5                                             | <i>Nano Res.</i> 2021, 15, 1102–1108             |
| 7     | L/D-CMOF            | CBS, FS, RB, R6G, AR  | 435,535,618,585, 610 | +11.5/-11.5, +3.4/-3.4, +7.5/-7.5, +11/-11, +3.5/-3.5 | <i>Adv. Mater.</i> 2020, 20, 2002914             |
| 8     | DCF-1/LCF-1         | C6, MCz               | 535, 525             | none, +9.1/-13.9                                      | <i>ACS Mater. Lett.</i> 2024, 6, 2559–2568       |
| 9     | DCF-20/LCF-20       | HBT1, HBT2, C152, NIR | 550,550, 500, 650    | +2.5/-7.5, +10.9/-10.9, +1.2/-1.2, +14.7/-16.3        | this work                                        |

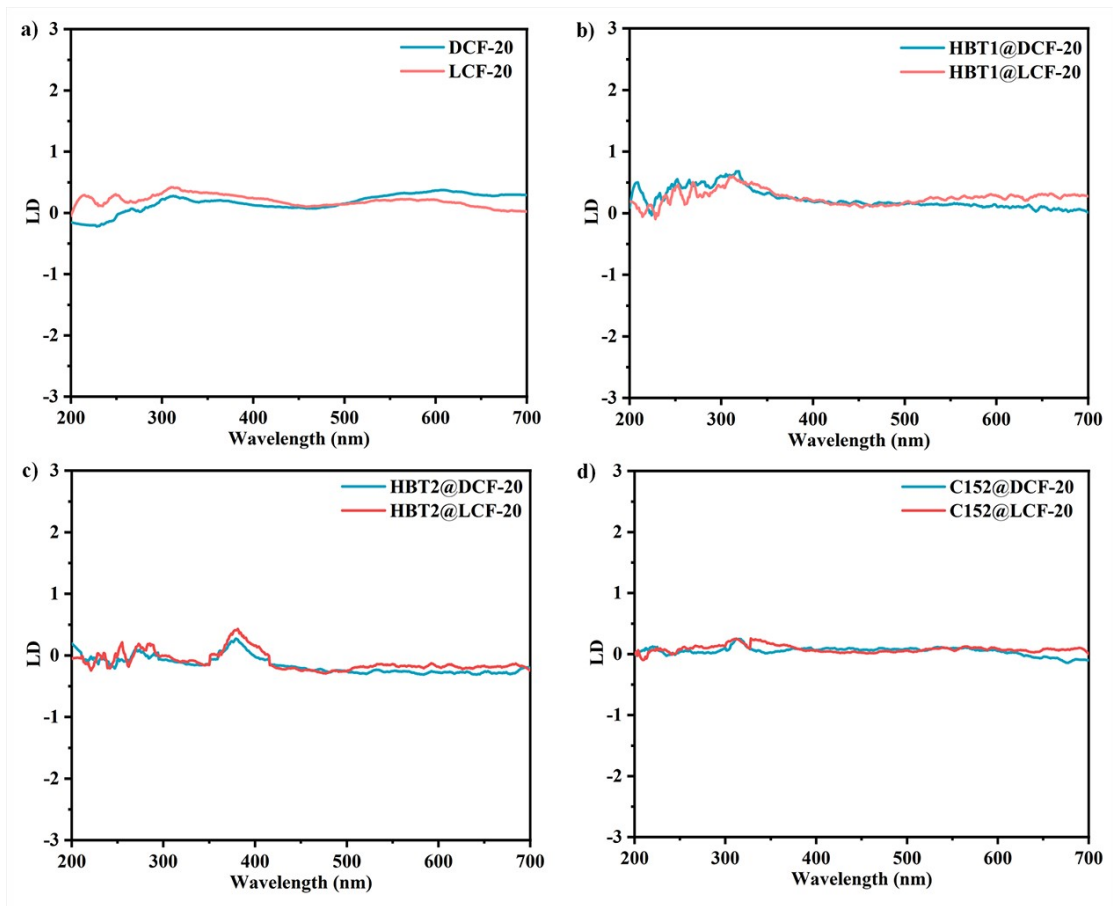

**Figure 30.** Linear dichroism spectra for DCF-20/LCF-20 and composites. (a) DCF-20/LCF-20; (b) HBT1@DCF-20-3/HBT1@LCF-20-3; (c) HBT2@DCF-20-3/HBT2@LCF-20-3; (d) C152@DCF-20-3/C152@LCF-20-3.

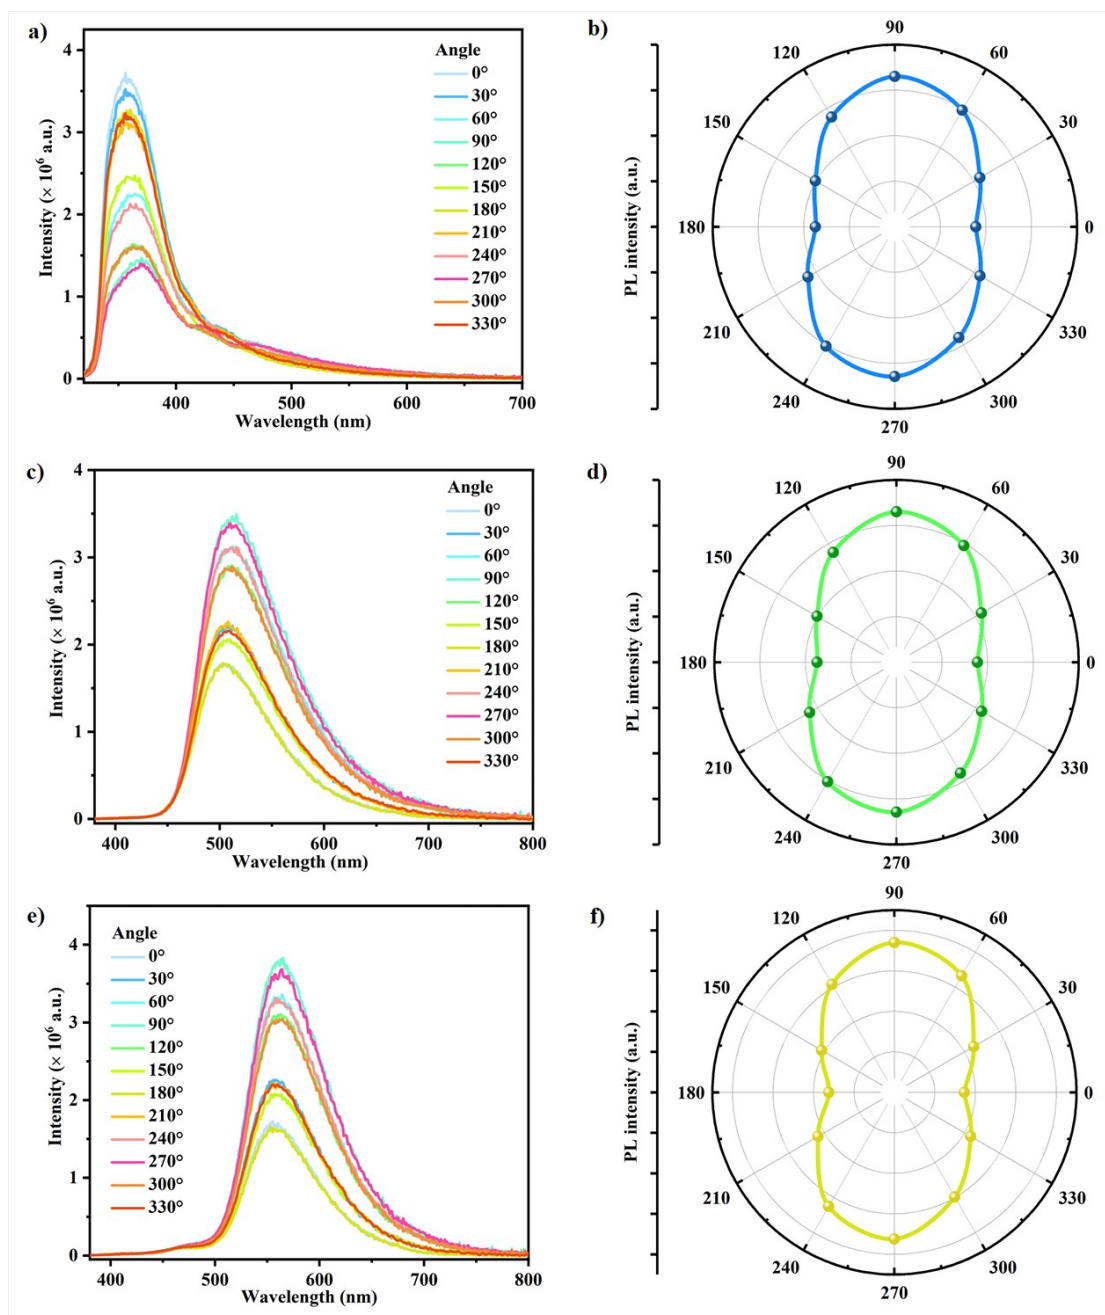

**Figure 31.** (a) Polarized emission spectra of DCF-20 crystal powder at changed angles ( $0\text{--}360^\circ$ ); (b) maximum emission intensity of DCF-20 at different polarizer rotation angles; (c) Polarized emission spectra of C152@DCF-20-3 crystal powder at changed angles ( $0\text{--}360^\circ$ ); (d) maximum emission intensity of C152@DCF-20-3 at different polarizer rotation angles; (e) Polarized emission spectra of HBT2@DCF-20-3 crystal powder at changed angles ( $0\text{--}360^\circ$ ); (f) maximum emission intensity of HBT2@DCF-20-3 at different polarizer rotation angles.



**Table S5.** The program for the generation of white-lighting emission.

|      | HBT1 ( $5 \times 10^3$ mol/L), mL | C152 ( $5 \times 10^3$ mol/L), mL | NIR ( $5 \times 10^3$ mol/L), mL | White or not |
|------|-----------------------------------|-----------------------------------|----------------------------------|--------------|
| WD-1 | 1.00                              | 0.80                              | 0.40                             | Yes          |
| WD-2 | 0.60                              | 0.60                              | 0.30                             | Yes          |
| WD-3 | 1.00                              | 0.40                              | 0.40                             |              |
| WD-4 | 0.40                              | 0.80                              | 0.60                             |              |
| WD-5 | 0.40                              | 0.20                              | 0.20                             | Yes          |
| WD-6 | 0.40                              | 0.30                              | 0.15                             |              |

When LCF-20 was used as host to encapsulate these guest molecules, the same processed were carried out.

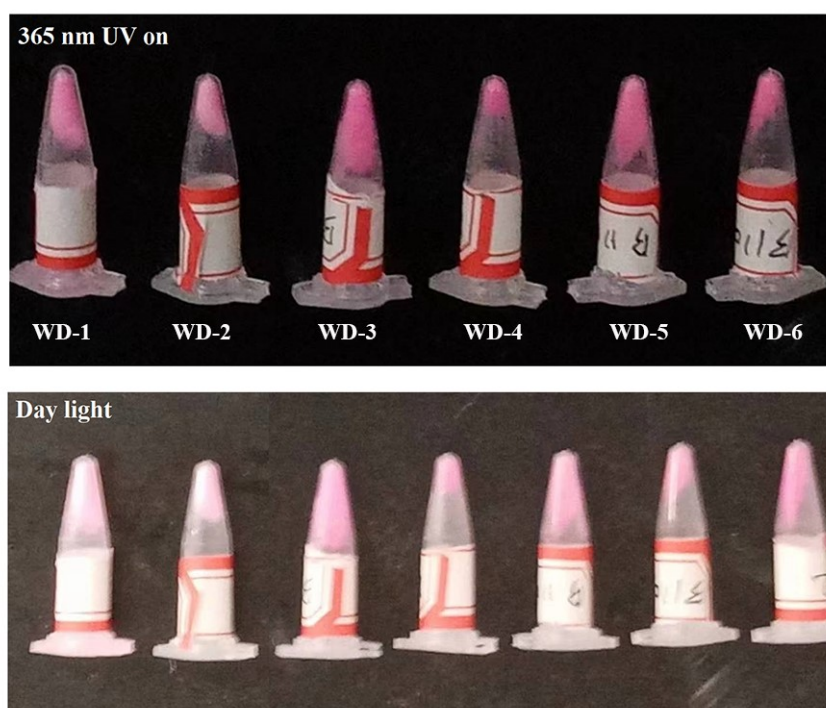

**Figure S32.** The photographs of WD-1 to WD-6 under UV lamp and day light at ambient conditions.

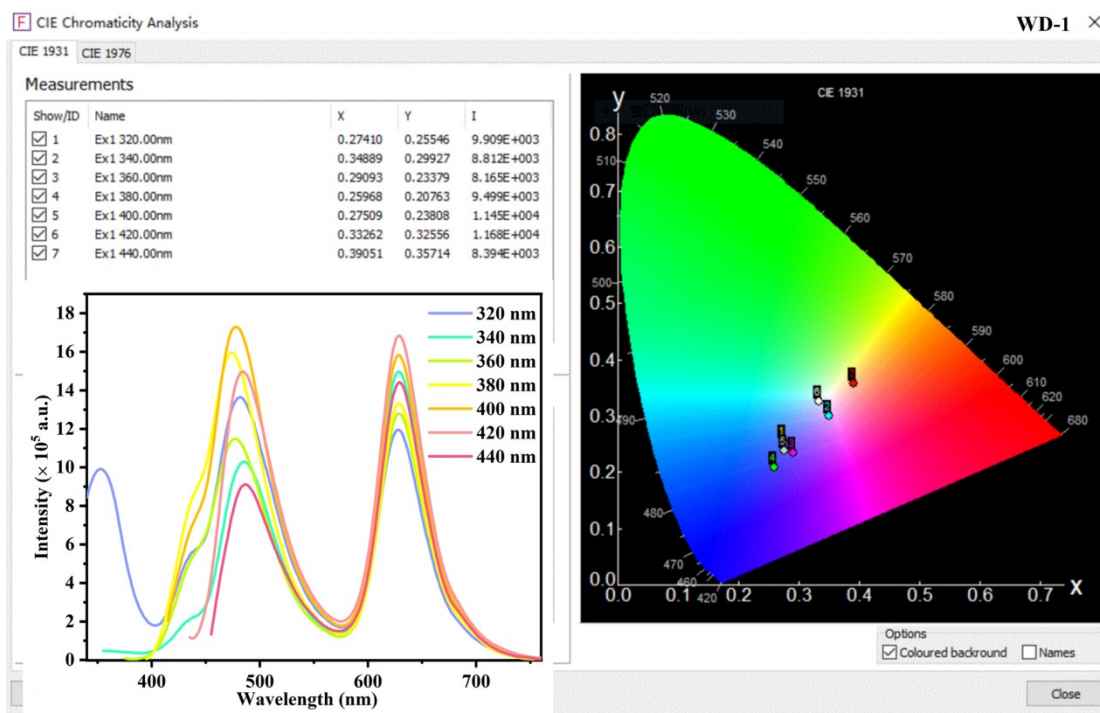

Figure S33. The emission behaviors including emission peaks and CIE coordinates of WD-1.

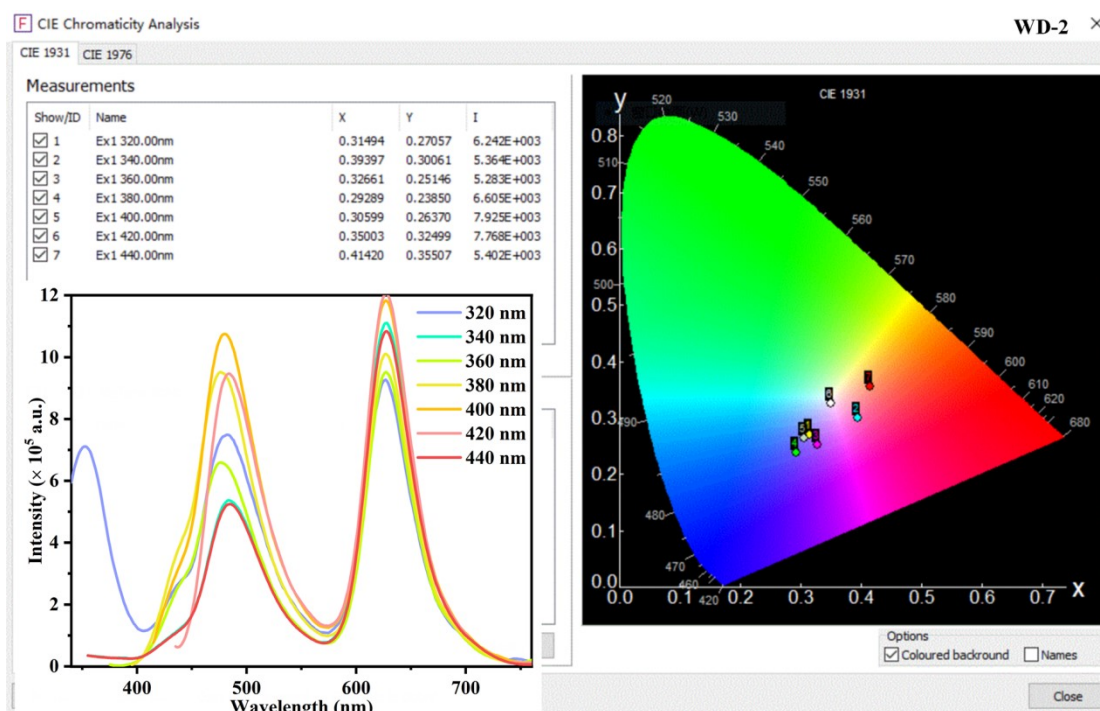

Figure S34. The emission behaviors including emission peaks and CIE coordinates of WD-2.

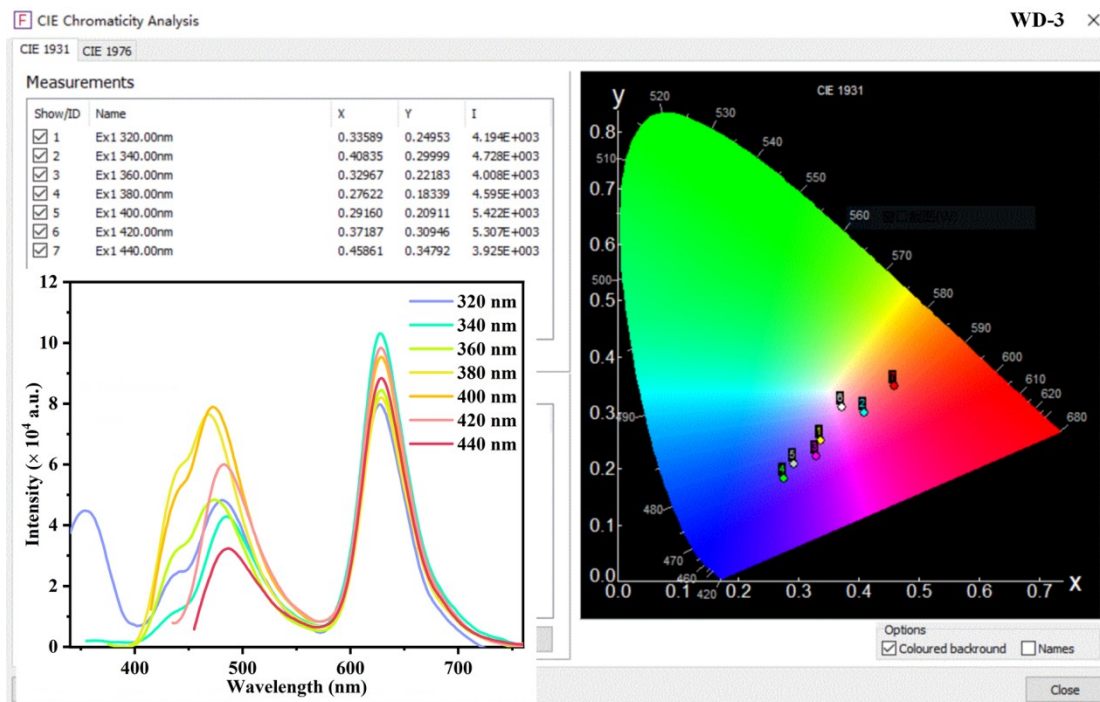

Figure S35. The emission behaviors including emission peaks and CIE coordinates of WD-3.

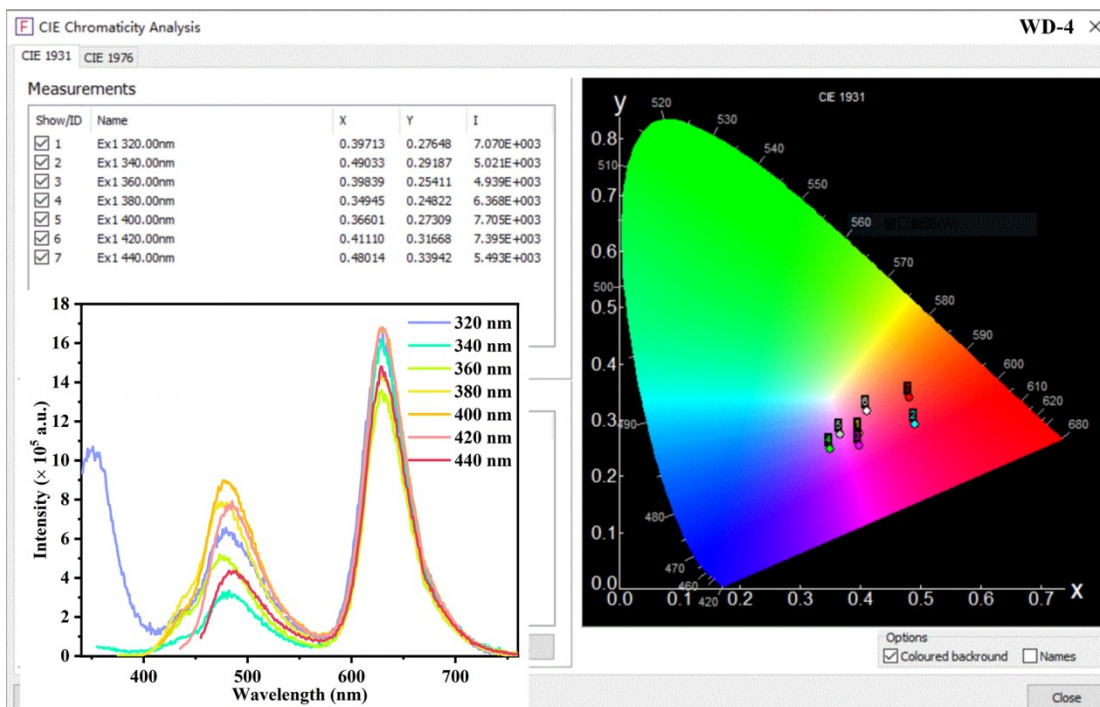

Figure S36. The emission behaviors including emission peaks and CIE coordinates of WD-4.

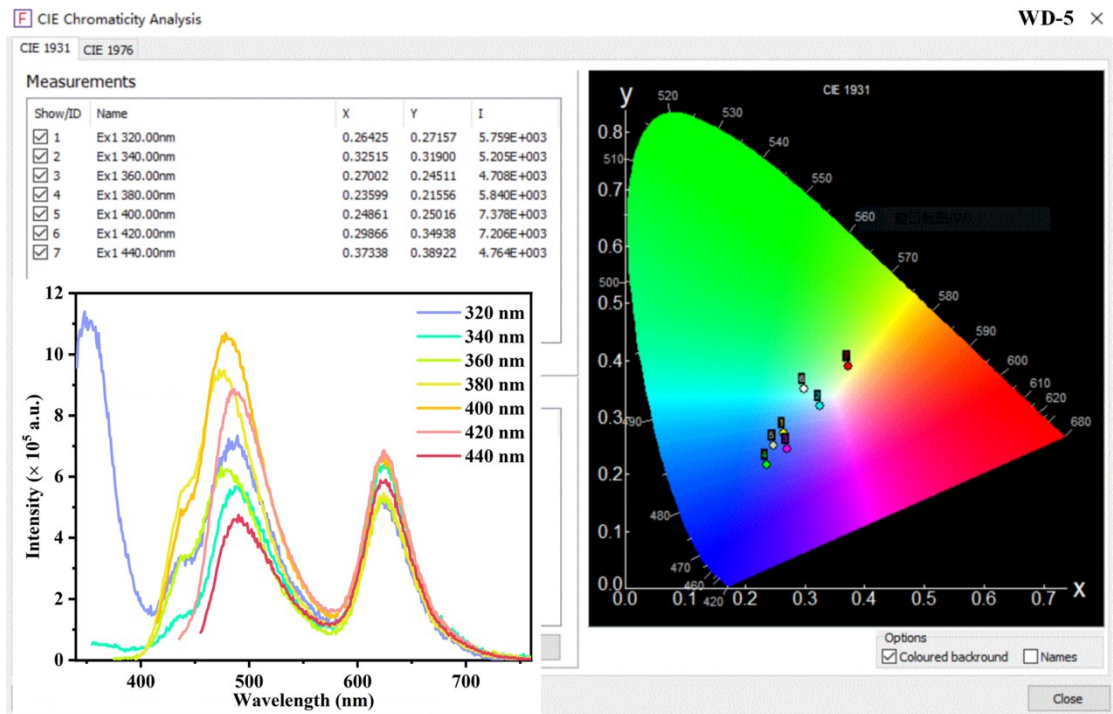

**Figure S37.** The emission behaviors including emission peaks and CIE coordinates of WD-5.

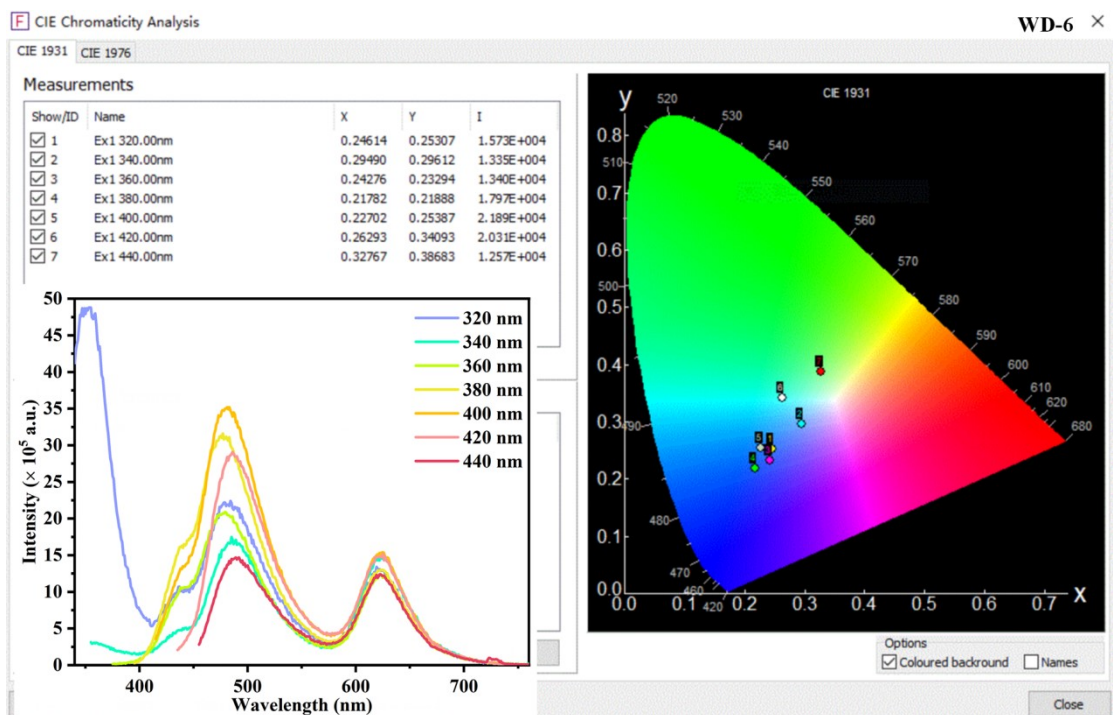

**Figure S38.** The emission behaviors including emission peaks and CIE coordinates of WD-6.

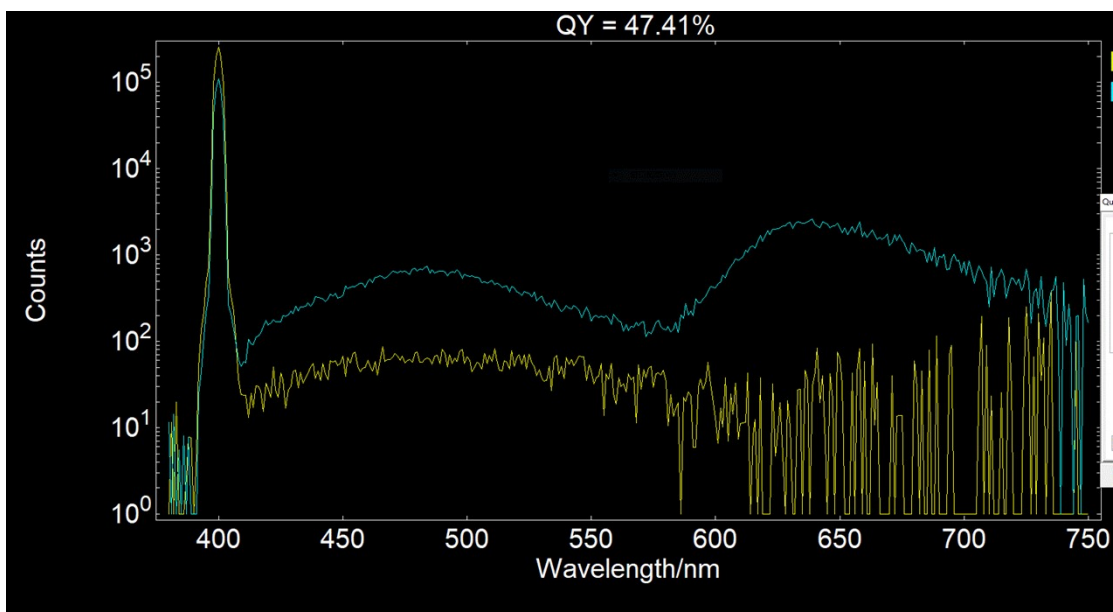

**Figure S39.** The fluorescence quantum yields of WD-5.

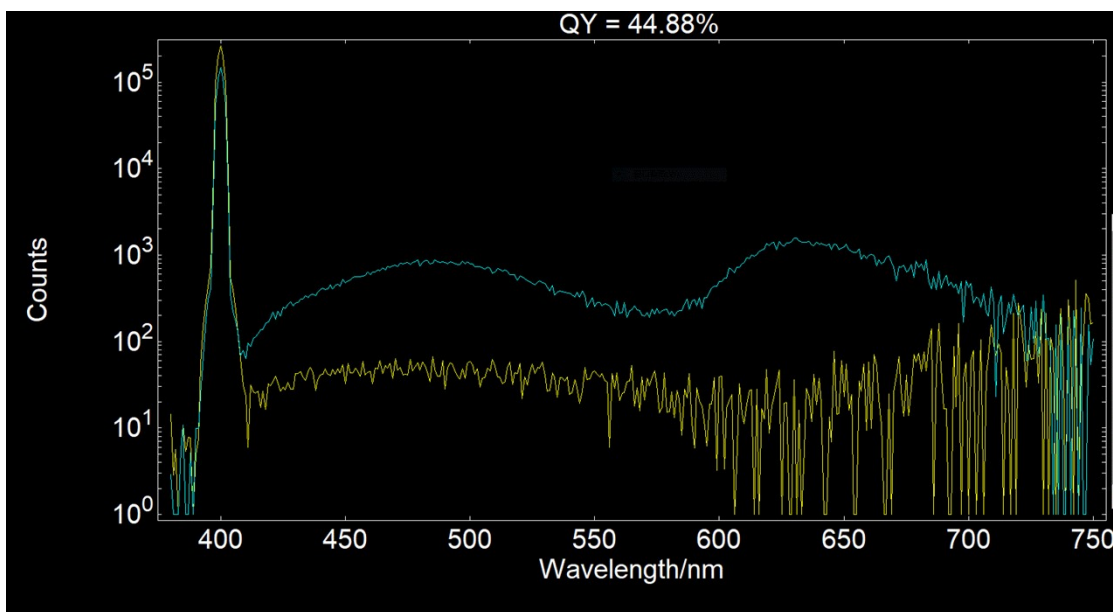

**Figure S40.** The fluorescence quantum yields of WL-5.

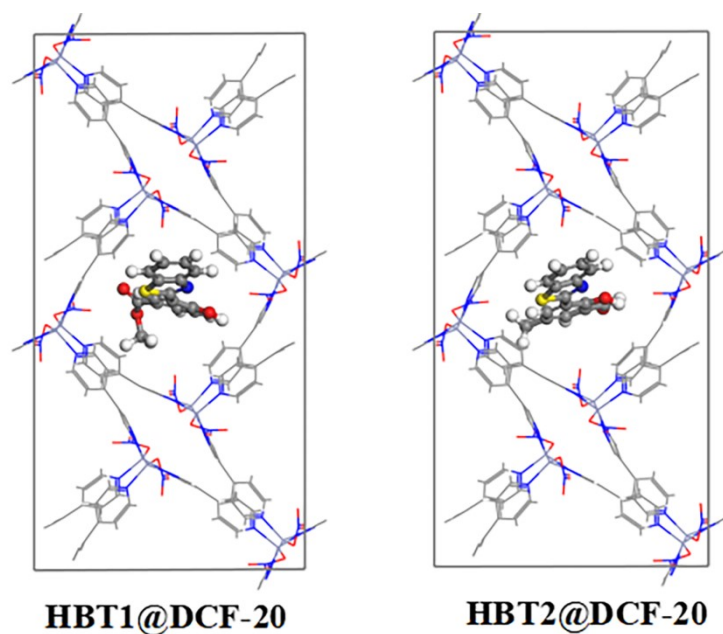

**Figure S41.** The optimized host-guest structure of HBT1@DCF-20 and HBT2@DCF-20.

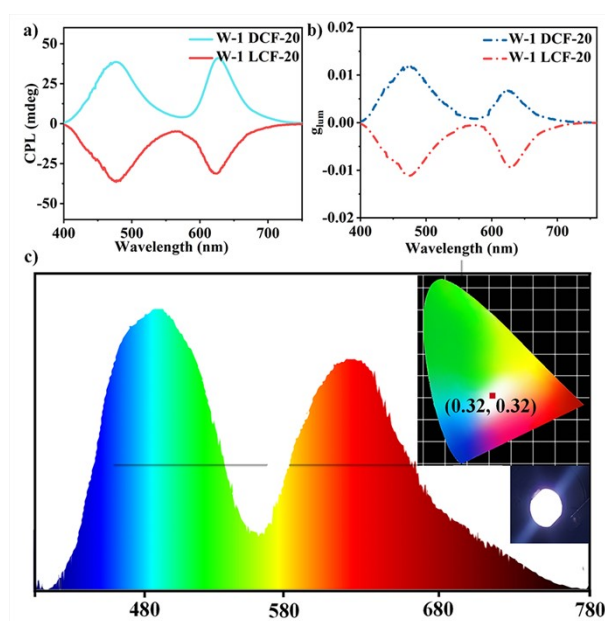

**Figure S42.** (a) CPL spectra of HBT1/C152/NIR@DCF-20 and HBT1/C152/NIR@LCF-20 ( $\lambda$  ex. of 340 nm); (b) glum of HBT1@C152@NIR@DCF-20 and HBT1@C152@NIR@LCF-20; (c) PL spectrum the white light emitting devices, the CIE coordinate diagram of the WLED.

**Table S6.** The crystallographic parameters of DCF-20 and LCF-20

| Identification code                                                                                                                                                                                                                                                                                  | DCF-20                                                                       | LCF-20                                                                       |
|------------------------------------------------------------------------------------------------------------------------------------------------------------------------------------------------------------------------------------------------------------------------------------------------------|------------------------------------------------------------------------------|------------------------------------------------------------------------------|
| Number of CCDC                                                                                                                                                                                                                                                                                       | 2364863                                                                      | 2364864                                                                      |
| Empirical formula                                                                                                                                                                                                                                                                                    | C <sub>16</sub> H <sub>21.50</sub> N <sub>3.50</sub> O <sub>3.50</sub> Zn    | C <sub>16</sub> H <sub>22.50</sub> N <sub>3.50</sub> O <sub>4</sub> Zn       |
| Formula weight                                                                                                                                                                                                                                                                                       | 384.24                                                                       | 393.24                                                                       |
| Temperature/K                                                                                                                                                                                                                                                                                        | 290                                                                          | 290                                                                          |
| Crystal system                                                                                                                                                                                                                                                                                       | tetragonal                                                                   | tetragonal                                                                   |
| Space group                                                                                                                                                                                                                                                                                          | <i>P</i> 4 <sub>1</sub> 2 <sub>1</sub> 2                                     | <i>P</i> 4 <sub>3</sub> 2 <sub>1</sub> 2                                     |
| <i>a</i> / Å                                                                                                                                                                                                                                                                                         | 18.1052(4)                                                                   | 18.1042(4)                                                                   |
| <i>b</i> / Å                                                                                                                                                                                                                                                                                         | 18.1052(4)                                                                   | 18.1042(4)                                                                   |
| <i>c</i> / Å                                                                                                                                                                                                                                                                                         | 13.2724(3)                                                                   | 13.2792(4)                                                                   |
| $\alpha$ / °                                                                                                                                                                                                                                                                                         | 90                                                                           | 90                                                                           |
| $\beta$ / °                                                                                                                                                                                                                                                                                          | 90                                                                           | 90                                                                           |
| $\gamma$ / °                                                                                                                                                                                                                                                                                         | 90                                                                           | 90                                                                           |
| Volume/ Å <sup>3</sup>                                                                                                                                                                                                                                                                               | 4350.7(2)                                                                    | 4352.4(2)                                                                    |
| <i>Z</i>                                                                                                                                                                                                                                                                                             | 8                                                                            | 8                                                                            |
| $\rho_{\text{calc}}/\text{cm}^3$                                                                                                                                                                                                                                                                     | 1.173                                                                        | 1.200                                                                        |
| $\mu / \text{mm}^{-1}$                                                                                                                                                                                                                                                                               | 1.147                                                                        | 1.150                                                                        |
| F(000)                                                                                                                                                                                                                                                                                               | 1264                                                                         | 1640                                                                         |
| Crystal size/ mm <sup>3</sup>                                                                                                                                                                                                                                                                        | 0.08 × 0.10 × 0.13                                                           | 0.08 × 0.10 × 0.13                                                           |
| Radiation                                                                                                                                                                                                                                                                                            | Mo-K $\alpha$ ( $\lambda = 0.71073$ )                                        | Mo-K $\alpha$ ( $\lambda = 0.71073$ )                                        |
| 2 $\theta$ range for data collection/°                                                                                                                                                                                                                                                               | 7.592 to 54.166                                                              | 7.596 to 59.5556                                                             |
| Index ranges                                                                                                                                                                                                                                                                                         | -21 ≤ <i>h</i> ≤ 24, -24 ≤ <i>k</i> ≤ 19, -18 ≤ <i>l</i> ≤ 9                 | -11 ≤ <i>h</i> ≤ 24, -24 ≤ <i>k</i> ≤ 15, -18 ≤ <i>l</i> ≤ 16                |
| Reflections collected                                                                                                                                                                                                                                                                                | 10487                                                                        | 11548                                                                        |
| Independent reflections                                                                                                                                                                                                                                                                              | 5016 [ <i>R</i> <sub>int</sub> = 0.0273, <i>R</i> <sub>sigma</sub> = 0.0525] | 5024 [ <i>R</i> <sub>int</sub> = 0.0298, <i>R</i> <sub>sigma</sub> = 0.0482] |
| Goodness-of-fit on F <sup>2</sup>                                                                                                                                                                                                                                                                    | 1.077                                                                        | 1.064                                                                        |
| Flc <sub>ak</sub>                                                                                                                                                                                                                                                                                    | 0.028(11)                                                                    | 0.000(11)                                                                    |
| <i>R</i> <sub>1</sub> [ <i>I</i> > 2 $\sigma$ ( <i>I</i> )]                                                                                                                                                                                                                                          | <i>R</i> <sub>1</sub> = 0.0379, <i>wR</i> <sub>2</sub> = 0.0846              | <i>R</i> <sub>1</sub> = 0.0375, <i>wR</i> <sub>2</sub> = 0.0889              |
| <i>wR</i> <sub>2</sub> (all data)                                                                                                                                                                                                                                                                    | <i>R</i> <sub>1</sub> = 0.0475, <i>wR</i> <sub>2</sub> = 0.0880              | <i>R</i> <sub>1</sub> = 0.0458, <i>wR</i> <sub>2</sub> = 0.0925              |
| $R = \frac{\sum   F_o  -  F_c  }{\sum  F_o }$ , $wR = \frac{\{\sum [w( F_o ^2 -  F_c ^2)]^2 / \sum [w( F_o ^4)]\}^{1/2}}$ , $w = 1/[\sigma^2(F_o^2) + (0.0519P)^2]$ where $P = (F_o^2 + 2F_c^2)/3$ for DCF-20.<br>$W = 1/[\sigma^2(F_o^2) + (0.0470P)^2]$ where $P = (F_o^2 + 2F_c^2)/3$ for LCF-15. |                                                                              |                                                                              |

**Table S7.** Atomic coordinates of optimized HBT1@DCF-20 models.

| label | type_symbol | x       | y       | z        | U_iso_or_equiv | adp_type | occupanc |
|-------|-------------|---------|---------|----------|----------------|----------|----------|
| Zn1   | Zn          | 0.41756 | 0.19601 | 0.64991  | 0.02363        | Uani     | 1.00     |
| N2    | N           | 0.49019 | 0.18162 | 0.41075  | 0.02436        | Uani     | 1.00     |
| N3    | N           | 0.50019 | 0.18054 | 0.53660  | 0.02825        | Uani     | 1.00     |
| N4    | N           | 0.81262 | 0.07705 | 0.41263  | 0.03374        | Uani     | 1.00     |
| O5    | O           | 0.45747 | 0.20756 | 0.80908  | 0.08893        | Uani     | 1.00     |
| C6    | C           | 0.60659 | 0.15183 | 0.44837  | 0.02847        | Uani     | 1.00     |
| C7    | C           | 0.67956 | 0.12717 | 0.43305  | 0.03421        | Uani     | 1.00     |
| C8    | C           | 0.55377 | 0.16400 | 0.35366  | 0.03101        | Uani     | 1.00     |
| H9    | H           | 0.56066 | 0.16002 | 0.25112  | 0.04900        | Uiso     | 1.00     |
| C10   | C           | 0.57091 | 0.16298 | 0.56295  | 0.03154        | Uani     | 1.00     |
| H11   | H           | 0.59284 | 0.15677 | 0.65850  | 0.04900        | Uiso     | 1.00     |
| C12   | C           | 0.74801 | 0.07047 | 0.33691  | 0.04589        | Uani     | 1.00     |
| H13   | H           | 0.74808 | 0.04568 | 0.27013  | 0.07100        | Uiso     | 1.00     |
| C14   | C           | 0.68128 | 0.09578 | 0.34381  | 0.05184        | Uani     | 1.00     |
| H15   | H           | 0.63049 | 0.09008 | 0.28276  | 0.08000        | Uiso     | 1.00     |
| C16   | C           | 0.81311 | 0.10779 | 0.49875  | 0.05198        | Uani     | 1.00     |
| H17   | H           | 0.86480 | 0.11205 | 0.55889  | 0.08200        | Uiso     | 1.00     |
| C18   | C           | 0.74614 | 0.13308 | 0.51190  | 0.05169        | Uani     | 1.00     |
| H19   | H           | 0.74623 | 0.15698 | 0.58253  | 0.08000        | Uiso     | 1.00     |
| N20   | N           | 0.47592 | 0.17244 | 0.87079  | 0.08829        | Uani     | 1.00     |
| O21   | O           | 0.47256 | 0.13796 | 0.81208  | 0.12208        | Uani     | 1.00     |
| O22   | O           | 0.49888 | 0.17330 | 0.98958  | 0.13402        | Uani     | 1.00     |
| Zn23  | Zn          | 0.58061 | 0.30513 | 0.14273  | 0.02358        | Uani     | 1.00     |
| N24   | N           | 0.51056 | 0.31693 | 0.90135  | 0.02440        | Uani     | 1.00     |
| N25   | N           | 0.49883 | 0.31944 | 0.02683  | 0.02824        | Uani     | 1.00     |
| N26   | N           | 0.18468 | 0.41780 | 0.89373  | 0.03383        | Uani     | 1.00     |
| O27   | O           | 0.53896 | 0.29410 | 0.30315  | 0.08944        | Uani     | 1.00     |
| C28   | C           | 0.38972 | 0.34281 | 0.93243  | 0.02860        | Uani     | 1.00     |
| C29   | C           | 0.31530 | 0.36589 | 0.91131  | 0.03428        | Uani     | 1.00     |
| C30   | C           | 0.44580 | 0.33148 | 0.84074  | 0.03107        | Uani     | 1.00     |
| H31   | H           | 0.44024 | 0.33390 | 0.73758  | 0.04900        | Uiso     | 1.00     |
| C32   | C           | 0.42520 | 0.33458 | 0.04942  | 0.03163        | Uani     | 1.00     |
| H33   | H           | 0.40074 | 0.34104 | 0.14366  | 0.04900        | Uiso     | 1.00     |
| C34   | C           | 0.24982 | 0.42389 | 0.81623  | 0.04618        | Uani     | 1.00     |
| H35   | H           | 0.25147 | 0.44922 | 0.75004  | 0.07100        | Uiso     | 1.00     |
| C36   | C           | 0.31506 | 0.39757 | 0.82111  | 0.05219        | Uani     | 1.00     |
| H37   | H           | 0.36670 | 0.40333 | 0.75990  | 0.08000        | Uiso     | 1.00     |
| C38   | C           | 0.18201 | 0.38634 | 0.97900  | 0.05259        | Uani     | 1.00     |
| H39   | H           | 0.13006 | 0.38252 | 0.04080  | 0.08200        | Uiso     | 1.00     |
| C40   | C           | 0.24771 | 0.36009 | -0.00933 | 0.05215        | Uani     | 1.00     |
| H41   | H           | 0.24672 | 0.33622 | 0.06273  | 0.08000        | Uiso     | 1.00     |
| N42   | N           | 0.51944 | 0.32951 | 0.36076  | 0.08808        | Uani     | 1.00     |
| O43   | O           | 0.52008 | 0.36343 | 0.29650  | 0.12230        | Uani     | 1.00     |
| O44   | O           | 0.49835 | 0.32949 | 0.48124  | 0.13405        | Uani     | 1.00     |
| Zn45  | Zn          | 0.09934 | 0.45599 | 0.88471  | 0.02357        | Uani     | 1.00     |
| N46   | N           | 0.12899 | 0.49296 | 0.64558  | 0.02440        | Uani     | 1.00     |
| N47   | N           | 0.12994 | 0.49785 | 0.77148  | 0.02829        | Uani     | 1.00     |
| N48   | N           | 0.34185 | 0.15339 | 0.65928  | 0.03396        | Uani     | 1.00     |
| O49   | O           | 0.07361 | 0.47611 | 0.04373  | 0.08818        | Uani     | 1.00     |



|      |    |          |          |          |         |      |      |
|------|----|----------|----------|----------|---------|------|------|
| C50  | C  | 0.18550  | 0.05284  | 0.69117  | 0.02857 | Uani | 1.00 |
| C51  | C  | 0.23667  | 0.08876  | 0.67559  | 0.03433 | Uani | 1.00 |
| C52  | C  | 0.16424  | 0.52515  | 0.58903  | 0.03108 | Uani | 1.00 |
| H53  | H  | 0.17559  | 0.02756  | 0.49579  | 0.04900 | Uiso | 1.00 |
| C54  | C  | 0.16059  | 0.03588  | 0.80633  | 0.03175 | Uani | 1.00 |
| H55  | H  | 0.17148  | 0.04753  | 0.90127  | 0.04900 | Uiso | 1.00 |
| C56  | C  | 0.35376  | 0.12054  | 0.58313  | 0.04641 | Uani | 1.00 |
| H57  | H  | 0.40428  | 0.11941  | 0.51773  | 0.07100 | Uiso | 1.00 |
| C58  | C  | 0.30073  | 0.08812  | 0.58796  | 0.05247 | Uani | 1.00 |
| H59  | H  | 0.31137  | 0.06221  | 0.52697  | 0.08000 | Uiso | 1.00 |
| C60  | C  | 0.27916  | 0.15516  | 0.74356  | 0.05248 | Uani | 1.00 |
| H61  | H  | 0.27165  | 0.18139  | 0.80413  | 0.08200 | Uiso | 1.00 |
| C62  | C  | 0.22599  | 0.12264  | 0.75455  | 0.05226 | Uani | 1.00 |
| H63  | H  | 0.17728  | 0.12383  | 0.82399  | 0.08000 | Uiso | 1.00 |
| N64  | N  | 0.14208  | 0.48657  | 0.10341  | 0.08822 | Uani | 1.00 |
| O65  | O  | 0.21070  | 0.48438  | 0.04394  | 0.12288 | Uani | 1.00 |
| O66  | O  | 0.13923  | 0.49948  | 0.22087  | 0.13492 | Uani | 1.00 |
| Zn67 | Zn | 0.90071  | 0.04078  | 0.40008  | 0.02351 | Uani | 1.00 |
| N68  | N  | 0.87371  | 0.00668  | 0.15936  | 0.02434 | Uani | 1.00 |
| N69  | N  | 0.87335  | -0.00029 | 0.28467  | 0.02823 | Uani | 1.00 |
| N70  | N  | 0.65654  | 0.34806  | 0.15027  | 0.03384 | Uani | 1.00 |
| O71  | O  | 0.92695  | 0.01989  | 0.55831  | 0.08877 | Uani | 1.00 |
| C72  | C  | 0.81269  | 0.44878  | 0.18876  | 0.02852 | Uani | 1.00 |
| C73  | C  | 0.76115  | 0.41296  | 0.17133  | 0.03428 | Uani | 1.00 |
| C74  | C  | 0.83806  | -0.02443 | 0.10069  | 0.03100 | Uani | 1.00 |
| H75  | H  | 0.82650  | 0.47543  | -0.00592 | 0.04900 | Uiso | 1.00 |
| C76  | C  | 0.83773  | 0.46457  | 0.30428  | 0.03165 | Uani | 1.00 |
| H77  | H  | 0.82566  | 0.45244  | 0.39927  | 0.04900 | Uiso | 1.00 |
| C78  | C  | 0.64726  | 0.38114  | 0.07260  | 0.04608 | Uani | 1.00 |
| H79  | H  | 0.59869  | 0.38239  | 0.00487  | 0.07100 | Uiso | 1.00 |
| C80  | C  | 0.70016  | 0.41369  | 0.07974  | 0.05220 | Uani | 1.00 |
| H81  | H  | 0.69147  | 0.43983  | 0.01774  | 0.08000 | Uiso | 1.00 |
| C82  | C  | 0.71635  | 0.34619  | 0.23794  | 0.05229 | Uani | 1.00 |
| H83  | H  | 0.72178  | 0.31983  | 0.29982  | 0.08200 | Uiso | 1.00 |
| C84  | C  | 0.76898  | 0.37875  | 0.25132  | 0.05193 | Uani | 1.00 |
| H85  | H  | 0.81521  | 0.37729  | 0.32346  | 0.08000 | Uiso | 1.00 |
| N86  | N  | 0.85879  | 0.00984  | 0.62276  | 0.08818 | Uani | 1.00 |
| O87  | O  | 0.79027  | 0.00928  | 0.56479  | 0.12208 | Uani | 1.00 |
| O88  | O  | 0.86219  | -0.00040 | 0.74333  | 0.13454 | Uani | 1.00 |
| Zn89 | Zn | 0.08119  | 0.44664  | 0.57286  | 0.02363 | Uani | 1.00 |
| N90  | N  | 0.00848  | 0.43215  | 0.81204  | 0.02439 | Uani | 1.00 |
| N91  | N  | -0.00202 | 0.43155  | 0.68637  | 0.02825 | Uani | 1.00 |
| N92  | N  | 0.68736  | 0.32859  | 0.81825  | 0.03376 | Uani | 1.00 |
| O93  | O  | 0.04232  | 0.45841  | 0.41248  | 0.08892 | Uani | 1.00 |
| C94  | C  | 0.89130  | 0.40371  | 0.77701  | 0.02852 | Uani | 1.00 |
| C95  | C  | 0.81870  | 0.37918  | 0.79465  | 0.03423 | Uani | 1.00 |
| C96  | C  | -0.05518 | 0.41509  | 0.87054  | 0.03105 | Uani | 1.00 |
| H97  | H  | 0.93855  | 0.41077  | 0.97327  | 0.04900 | Uiso | 1.00 |
| C98  | C  | 0.92665  | 0.41478  | 0.66149  | 0.03158 | Uani | 1.00 |
| H99  | H  | 0.90418  | 0.40891  | 0.56649  | 0.04900 | Uiso | 1.00 |
| C100 | C  | 0.75211  | 0.32230  | 0.89442  | 0.04610 | Uani | 1.00 |
| H101 | H  | 0.75305  | 0.29739  | 0.96219  | 0.07100 | Uiso | 1.00 |
| C102 | C  | 0.81804  | 0.34780  | 0.88577  | 0.05203 | Uani | 1.00 |

|       |    |         |         |          |         |      |      |
|-------|----|---------|---------|----------|---------|------|------|
| H103  | H  | 0.86921 | 0.34213 | 0.94658  | 0.08000 | Uiso | 1.00 |
| C104  | C  | 0.68554 | 0.35948 | 0.73093  | 0.05219 | Uani | 1.00 |
| H105  | H  | 0.63362 | 0.36357 | 0.67076  | 0.08200 | Uiso | 1.00 |
| C106  | C  | 0.75167 | 0.38507 | 0.71627  | 0.05192 | Uani | 1.00 |
| H107  | H  | 0.75074 | 0.40904 | 0.64456  | 0.08000 | Uiso | 1.00 |
| N108  | N  | 0.02316 | 0.42328 | 0.35378  | 0.08838 | Uani | 1.00 |
| O109  | O  | 0.02429 | 0.38905 | 0.41618  | 0.12268 | Uani | 1.00 |
| O110  | O  | 0.00176 | 0.42389 | 0.23419  | 0.13472 | Uani | 1.00 |
| Zn111 | Zn | 0.91930 | 0.05424 | 0.08808  | 0.02357 | Uani | 1.00 |
| N112  | N  | 0.99010 | 0.06741 | 0.32659  | 0.02434 | Uani | 1.00 |
| N113  | N  | 1.00080 | 0.06954 | 0.20067  | 0.02819 | Uani | 1.00 |
| N114  | N  | 0.31297 | 0.17054 | 0.32781  | 0.03365 | Uani | 1.00 |
| O115  | O  | 0.95991 | 0.04380 | 0.92711  | 0.08958 | Uani | 1.00 |
| C116  | C  | 0.10634 | 0.09741 | 0.28958  | 0.02849 | Uani | 1.00 |
| C117  | C  | 0.17965 | 0.12132 | 0.30619  | 0.03420 | Uani | 1.00 |
| C118  | C  | 1.05299 | 0.08457 | 0.38408  | 0.03098 | Uani | 1.00 |
| H119  | H  | 0.05924 | 0.08762 | 0.48683  | 0.04900 | Uiso | 1.00 |
| C120  | C  | 0.07151 | 0.08727 | 0.17458  | 0.03150 | Uani | 1.00 |
| H121  | H  | 0.09424 | 0.09404 | 0.07917  | 0.04900 | Uiso | 1.00 |
| C122  | C  | 0.24784 | 0.17700 | 0.40496  | 0.04581 | Uani | 1.00 |
| H123  | H  | 0.24741 | 0.20152 | 0.47277  | 0.07100 | Uiso | 1.00 |
| C124  | C  | 0.18101 | 0.15207 | 0.39760  | 0.05182 | Uani | 1.00 |
| H125  | H  | 0.12976 | 0.15771 | 0.45963  | 0.08000 | Uiso | 1.00 |
| C126  | C  | 0.31405 | 0.14018 | 0.24032  | 0.05210 | Uani | 1.00 |
| H127  | H  | 0.36606 | 0.13605 | 0.17889  | 0.08200 | Uiso | 1.00 |
| C128  | C  | 0.24697 | 0.11536 | 0.22656  | 0.05166 | Uani | 1.00 |
| H129  | H  | 0.24744 | 0.09190 | 0.15447  | 0.08000 | Uiso | 1.00 |
| N130  | N  | 0.97607 | 0.07939 | 0.86636  | 0.08831 | Uani | 1.00 |
| O131  | O  | 0.97370 | 0.11338 | 0.92814  | 0.12192 | Uani | 1.00 |
| O132  | O  | 0.99624 | 0.07944 | 0.74549  | 0.13435 | Uani | 1.00 |
| Zn133 | Zn | 0.40008 | 0.20723 | 0.33732  | 0.02352 | Uani | 1.00 |
| N134  | N  | 0.37030 | 0.24274 | 0.57630  | 0.02441 | Uani | 1.00 |
| N135  | N  | 0.37090 | 0.24879 | 0.45055  | 0.02828 | Uani | 1.00 |
| N136  | N  | 0.15616 | 0.40332 | 0.56556  | 0.03404 | Uani | 1.00 |
| O137  | O  | 0.42578 | 0.22776 | 0.17772  | 0.08862 | Uani | 1.00 |
| C138  | C  | 0.31112 | 0.30162 | 0.53803  | 0.02864 | Uani | 1.00 |
| C139  | C  | 0.26007 | 0.33777 | 0.55160  | 0.03438 | Uani | 1.00 |
| C140  | C  | 0.33310 | 0.27415 | 0.63286  | 0.03110 | Uani | 1.00 |
| H141  | H  | 0.32162 | 0.27644 | 0.73495  | 0.04900 | Uiso | 1.00 |
| C142  | C  | 0.33628 | 0.28463 | 0.42391  | 0.03180 | Uani | 1.00 |
| H143  | H  | 0.32529 | 0.29627 | 0.32828  | 0.04900 | Uiso | 1.00 |
| C144  | C  | 0.14231 | 0.36993 | 0.64021  | 0.04649 | Uani | 1.00 |
| H145  | H  | 0.09082 | 0.36877 | 0.70362  | 0.07100 | Uiso | 1.00 |
| C146  | C  | 0.19463 | 0.33701 | 0.63651  | 0.05262 | Uani | 1.00 |
| H147  | H  | 0.18261 | 0.31072 | 0.69648  | 0.08000 | Uiso | 1.00 |
| C148  | C  | 0.22011 | 0.40513 | 0.48368  | 0.05284 | Uani | 1.00 |
| H149  | H  | 0.22921 | 0.43180 | 0.42425  | 0.08200 | Uiso | 1.00 |
| C150  | C  | 0.27267 | 0.37217 | 0.47384  | 0.05247 | Uani | 1.00 |
| H151  | H  | 0.32250 | 0.37345 | 0.40648  | 0.08000 | Uiso | 1.00 |
| N152  | N  | 0.35730 | 0.23764 | 0.11562  | 0.08794 | Uani | 1.00 |
| O153  | O  | 0.28863 | 0.23752 | 0.17549  | 0.12253 | Uani | 1.00 |
| O154  | O  | 0.36040 | 0.24823 | -0.00476 | 0.13427 | Uani | 1.00 |
| Zn155 | Zn | 0.60156 | 0.29141 | 0.83149  | 0.02356 | Uani | 1.00 |

|       |    |         |         |          |         |      |      |
|-------|----|---------|---------|----------|---------|------|------|
| N156  | N  | 0.62897 | 0.25779 | 0.07501  | 0.02436 | Uani | 1.00 |
| N157  | N  | 0.62998 | 0.25077 | 0.95011  | 0.02828 | Uani | 1.00 |
| N158  | N  | 0.84201 | 0.09659 | 0.08219  | 0.03394 | Uani | 1.00 |
| O159  | O  | 0.57738 | 0.27017 | 0.67415  | 0.08820 | Uani | 1.00 |
| C160  | C  | 0.68741 | 0.19826 | 0.04489  | 0.02851 | Uani | 1.00 |
| C161  | C  | 0.73734 | 0.16182 | 0.06354  | 0.03430 | Uani | 1.00 |
| C162  | C  | 0.66427 | 0.22649 | 0.13594  | 0.03103 | Uani | 1.00 |
| H163  | H  | 0.67350 | 0.22472 | 0.23844  | 0.04900 | Uiso | 1.00 |
| C164  | C  | 0.66436 | 0.21460 | 0.92838  | 0.03170 | Uani | 1.00 |
| H165  | H  | 0.67634 | 0.20222 | 0.83429  | 0.04900 | Uiso | 1.00 |
| C166  | C  | 0.85205 | 0.12927 | 0.15923  | 0.04616 | Uani | 1.00 |
| H167  | H  | 0.90133 | 0.13016 | 0.22545  | 0.07100 | Uiso | 1.00 |
| C168  | C  | 0.79920 | 0.16199 | 0.15322  | 0.05223 | Uani | 1.00 |
| H169  | H  | 0.80868 | 0.18787 | 0.21434  | 0.08000 | Uiso | 1.00 |
| C170  | C  | 0.78087 | 0.09507 | -0.00289 | 0.05220 | Uani | 1.00 |
| H171  | H  | 0.77477 | 0.06897 | 0.93599  | 0.08200 | Uiso | 1.00 |
| C172  | C  | 0.72803 | 0.12786 | 0.98498  | 0.05197 | Uani | 1.00 |
| H173  | H  | 0.68091 | 0.12690 | 0.91437  | 0.08000 | Uiso | 1.00 |
| N174  | N  | 0.64632 | 0.25996 | 0.61230  | 0.08815 | Uani | 1.00 |
| O175  | O  | 0.71451 | 0.26050 | 0.67122  | 0.12220 | Uani | 1.00 |
| O176  | O  | 0.64406 | 0.24874 | 0.49311  | 0.13418 | Uani | 1.00 |
| Zn177 | Zn | 0.41756 | 0.69630 | 0.64823  | 0.02363 | Uani | 1.00 |
| N178  | N  | 0.48938 | 0.68175 | 0.40832  | 0.02436 | Uani | 1.00 |
| N179  | N  | 0.49938 | 0.68053 | 0.53421  | 0.02825 | Uani | 1.00 |
| N180  | N  | 0.81244 | 0.57680 | 0.41098  | 0.03374 | Uani | 1.00 |
| O181  | O  | 0.45783 | 0.70768 | 0.80720  | 0.08893 | Uani | 1.00 |
| C182  | C  | 0.60435 | 0.65040 | 0.44669  | 0.02847 | Uani | 1.00 |
| C183  | C  | 0.67749 | 0.62572 | 0.43260  | 0.03421 | Uani | 1.00 |
| C184  | C  | 0.55208 | 0.66309 | 0.35157  | 0.03101 | Uani | 1.00 |
| H185  | H  | 0.55905 | 0.65904 | 0.24906  | 0.04900 | Uiso | 1.00 |
| C186  | C  | 0.56923 | 0.66212 | 0.56080  | 0.03154 | Uani | 1.00 |
| H187  | H  | 0.59119 | 0.65591 | 0.65626  | 0.04900 | Uiso | 1.00 |
| C188  | C  | 0.74664 | 0.56876 | 0.33924  | 0.04589 | Uani | 1.00 |
| H189  | H  | 0.74640 | 0.54337 | 0.27478  | 0.07100 | Uiso | 1.00 |
| C190  | C  | 0.67856 | 0.59312 | 0.34818  | 0.05184 | Uani | 1.00 |
| H191  | H  | 0.62610 | 0.58571 | 0.29345  | 0.08000 | Uiso | 1.00 |
| C192  | C  | 0.81281 | 0.60821 | 0.49470  | 0.05198 | Uani | 1.00 |
| H193  | H  | 0.86511 | 0.61349 | 0.55255  | 0.08200 | Uiso | 1.00 |
| C194  | C  | 0.74506 | 0.63303 | 0.50799  | 0.05169 | Uani | 1.00 |
| H195  | H  | 0.74536 | 0.65764 | 0.57605  | 0.08000 | Uiso | 1.00 |
| N196  | N  | 0.47631 | 0.67235 | 0.86735  | 0.08829 | Uani | 1.00 |
| O197  | O  | 0.47326 | 0.63826 | 0.80655  | 0.12208 | Uani | 1.00 |
| O198  | O  | 0.49863 | 0.67263 | 0.98652  | 0.13402 | Uani | 1.00 |
| Zn199 | Zn | 0.58286 | 0.80451 | 0.15299  | 0.02358 | Uani | 1.00 |
| N200  | N  | 0.51128 | 0.81902 | 0.91438  | 0.02440 | Uani | 1.00 |
| N201  | N  | 0.50115 | 0.82079 | 0.04037  | 0.02824 | Uani | 1.00 |
| N202  | N  | 0.18704 | 0.92223 | 0.91092  | 0.03383 | Uani | 1.00 |
| O203  | O  | 0.54196 | 0.79333 | 0.31378  | 0.08944 | Uani | 1.00 |
| C204  | C  | 0.39500 | 0.84916 | 0.95183  | 0.02860 | Uani | 1.00 |
| C205  | C  | 0.32146 | 0.87325 | 0.93511  | 0.03428 | Uani | 1.00 |
| C206  | C  | 0.44794 | 0.83641 | 0.85710  | 0.03107 | Uani | 1.00 |
| H207  | H  | 0.44107 | 0.83962 | 0.75432  | 0.04900 | Uiso | 1.00 |
| C208  | C  | 0.43040 | 0.83860 | 0.06671  | 0.03163 | Uani | 1.00 |

|       |    |         |         |          |         |      |      |
|-------|----|---------|---------|----------|---------|------|------|
| H209  | H  | 0.40796 | 0.84507 | 0.16215  | 0.04900 | Uiso | 1.00 |
| C210  | C  | 0.25219 | 0.92901 | 0.83400  | 0.04618 | Uani | 1.00 |
| H211  | H  | 0.25210 | 0.95362 | 0.76512  | 0.07100 | Uiso | 1.00 |
| C212  | C  | 0.31961 | 0.90424 | 0.84272  | 0.05219 | Uani | 1.00 |
| H213  | H  | 0.37085 | 0.91011 | 0.78077  | 0.08000 | Uiso | 1.00 |
| C214  | C  | 0.18659 | 0.89176 | 0.99980  | 0.05259 | Uani | 1.00 |
| H215  | H  | 0.13452 | 0.88737 | 0.06096  | 0.08200 | Uiso | 1.00 |
| C216  | C  | 0.25424 | 0.86706 | 0.01489  | 0.05215 | Uani | 1.00 |
| H217  | H  | 0.25420 | 0.84344 | 0.08779  | 0.08000 | Uiso | 1.00 |
| N218  | N  | 0.52476 | 0.82867 | 0.37374  | 0.08808 | Uani | 1.00 |
| O219  | O  | 0.52823 | 0.86300 | 0.31207  | 0.12230 | Uani | 1.00 |
| O220  | O  | 0.50272 | 0.82816 | 0.49379  | 0.13405 | Uani | 1.00 |
| Zn221 | Zn | 0.09870 | 0.95842 | 0.89796  | 0.02357 | Uani | 1.00 |
| N222  | N  | 0.12760 | 0.99387 | 0.65652  | 0.02440 | Uani | 1.00 |
| N223  | N  | 0.12671 | 1.00000 | 0.78190  | 0.02829 | Uani | 1.00 |
| N224  | N  | 0.34111 | 0.65372 | 0.65700  | 0.03396 | Uani | 1.00 |
| O225  | O  | 0.07146 | 0.97902 | 0.05579  | 0.08818 | Uani | 1.00 |
| C226  | C  | 0.18724 | 0.55176 | 0.68425  | 0.02857 | Uani | 1.00 |
| C227  | C  | 0.23661 | 0.58855 | 0.67058  | 0.03433 | Uani | 1.00 |
| C228  | C  | 0.16398 | 1.02534 | 0.59800  | 0.03108 | Uani | 1.00 |
| H229  | H  | 0.17348 | 0.52861 | 0.48655  | 0.04900 | Uiso | 1.00 |
| C230  | C  | 0.16418 | 0.53347 | 0.79839  | 0.03175 | Uani | 1.00 |
| H231  | H  | 0.17556 | 0.54430 | 0.89416  | 0.04900 | Uiso | 1.00 |
| C232  | C  | 0.34744 | 0.62342 | 0.56957  | 0.04641 | Uani | 1.00 |
| H233  | H  | 0.39348 | 0.62428 | 0.49620  | 0.07100 | Uiso | 1.00 |
| C234  | C  | 0.29355 | 0.59137 | 0.57156  | 0.05247 | Uani | 1.00 |
| H235  | H  | 0.29863 | 0.56817 | 0.49930  | 0.08000 | Uiso | 1.00 |
| C236  | C  | 0.28448 | 0.65254 | 0.75186  | 0.05248 | Uani | 1.00 |
| H237  | H  | 0.28167 | 0.67651 | 0.82197  | 0.08200 | Uiso | 1.00 |
| C238  | C  | 0.23222 | 0.61958 | 0.76192  | 0.05226 | Uani | 1.00 |
| H239  | H  | 0.18912 | 0.61828 | 0.84029  | 0.08000 | Uiso | 1.00 |
| N240  | N  | 0.13925 | 0.98950 | 0.11784  | 0.08822 | Uani | 1.00 |
| O241  | O  | 0.20823 | 0.98943 | 0.05902  | 0.12288 | Uani | 1.00 |
| O242  | O  | 0.13509 | 1.00057 | 0.23712  | 0.13492 | Uani | 1.00 |
| Zn243 | Zn | 0.90211 | 0.54109 | 0.39677  | 0.02351 | Uani | 1.00 |
| N244  | N  | 0.87470 | 0.50721 | 0.15512  | 0.02434 | Uani | 1.00 |
| N245  | N  | 0.87435 | 0.50008 | 0.28037  | 0.02823 | Uani | 1.00 |
| N246  | N  | 0.66016 | 0.84657 | 0.15937  | 0.03384 | Uani | 1.00 |
| O247  | O  | 0.93161 | 0.51977 | 0.55346  | 0.08877 | Uani | 1.00 |
| C248  | C  | 0.81525 | 0.94744 | 0.19357  | 0.02852 | Uani | 1.00 |
| C249  | C  | 0.76475 | 0.91137 | 0.17707  | 0.03428 | Uani | 1.00 |
| C250  | C  | 0.83693 | 0.47674 | 0.09626  | 0.03100 | Uani | 1.00 |
| H251  | H  | 0.82789 | 0.97399 | -0.00153 | 0.04900 | Uiso | 1.00 |
| C252  | C  | 0.83887 | 0.96370 | 0.30892  | 0.03165 | Uani | 1.00 |
| H253  | H  | 0.82686 | 0.95148 | 0.40385  | 0.04900 | Uiso | 1.00 |
| C254  | C  | 0.65049 | 0.87947 | 0.08111  | 0.04608 | Uani | 1.00 |
| H255  | H  | 0.60165 | 0.88067 | 0.01401  | 0.07100 | Uiso | 1.00 |
| C256  | C  | 0.70332 | 0.91195 | 0.08659  | 0.05220 | Uani | 1.00 |
| H257  | H  | 0.69429 | 0.93792 | 0.02402  | 0.08000 | Uiso | 1.00 |
| C258  | C  | 0.72074 | 0.84469 | 0.24565  | 0.05229 | Uani | 1.00 |
| H259  | H  | 0.72650 | 0.81845 | 0.30792  | 0.08200 | Uiso | 1.00 |
| C260  | C  | 0.77350 | 0.87726 | 0.25733  | 0.05193 | Uani | 1.00 |
| H261  | H  | 0.82025 | 0.87599 | 0.32864  | 0.08000 | Uiso | 1.00 |

|       |    |          |         |         |         |      |      |
|-------|----|----------|---------|---------|---------|------|------|
| N262  | N  | 0.86540  | 0.51245 | 0.62626 | 0.08818 | Uani | 1.00 |
| O263  | O  | 0.79448  | 0.51477 | 0.57710 | 0.12208 | Uani | 1.00 |
| O264  | O  | 0.87290  | 0.50151 | 0.74563 | 0.13454 | Uani | 1.00 |
| Zn265 | Zn | 0.08265  | 0.94679 | 0.58577 | 0.02363 | Uani | 1.00 |
| N266  | N  | 0.00996  | 0.93219 | 0.82540 | 0.02439 | Uani | 1.00 |
| N267  | N  | 0.00049  | 0.93095 | 0.69953 | 0.02825 | Uani | 1.00 |
| N268  | N  | 0.68829  | 0.82851 | 0.82644 | 0.03376 | Uani | 1.00 |
| O269  | O  | 0.04264  | 0.95773 | 0.42550 | 0.08892 | Uani | 1.00 |
| C270  | C  | 0.89407  | 0.90256 | 0.78858 | 0.02852 | Uani | 1.00 |
| C271  | C  | 0.82110  | 0.87823 | 0.80473 | 0.03423 | Uani | 1.00 |
| C272  | C  | -0.05360 | 0.91469 | 0.88304 | 0.03105 | Uani | 1.00 |
| H273  | H  | 0.93906  | 0.91088 | 0.98579 | 0.04900 | Uiso | 1.00 |
| C274  | C  | 0.93003  | 0.91351 | 0.67364 | 0.03158 | Uani | 1.00 |
| H275  | H  | 0.90834  | 0.90740 | 0.57831 | 0.04900 | Uiso | 1.00 |
| C276  | C  | 0.75291  | 0.82150 | 0.90241 | 0.04610 | Uani | 1.00 |
| H277  | H  | 0.75298  | 0.79654 | 0.96995 | 0.07100 | Uiso | 1.00 |
| C278  | C  | 0.81951  | 0.84662 | 0.89489 | 0.05203 | Uani | 1.00 |
| H279  | H  | 0.87033  | 0.84060 | 0.95614 | 0.08000 | Uiso | 1.00 |
| C280  | C  | 0.68766  | 0.85949 | 0.73944 | 0.05219 | Uani | 1.00 |
| H281  | H  | 0.63595  | 0.86409 | 0.67916 | 0.08200 | Uiso | 1.00 |
| C282  | C  | 0.75455  | 0.88461 | 0.72563 | 0.05192 | Uani | 1.00 |
| H283  | H  | 0.75443  | 0.90870 | 0.65426 | 0.08000 | Uiso | 1.00 |
| N284  | N  | 0.02602  | 0.92229 | 0.36659 | 0.08838 | Uani | 1.00 |
| O285  | O  | 0.02956  | 0.88808 | 0.42882 | 0.12268 | Uani | 1.00 |
| O286  | O  | 0.00450  | 0.92261 | 0.24704 | 0.13472 | Uani | 1.00 |
| Zn287 | Zn | 0.92216  | 0.55447 | 0.08425 | 0.02357 | Uani | 1.00 |
| N288  | N  | 0.99113  | 0.56826 | 0.32321 | 0.02434 | Uani | 1.00 |
| N289  | N  | 1.00273  | 0.56957 | 0.19749 | 0.02819 | Uani | 1.00 |
| N290  | N  | 0.31123  | 0.67393 | 0.32145 | 0.03365 | Uani | 1.00 |
| O291  | O  | 0.96456  | 0.54385 | 0.92462 | 0.08958 | Uani | 1.00 |
| C292  | C  | 0.10637  | 0.59931 | 0.28559 | 0.02849 | Uani | 1.00 |
| C293  | C  | 0.17859  | 0.62420 | 0.30048 | 0.03420 | Uani | 1.00 |
| C294  | C  | 1.05296  | 0.58657 | 0.38032 | 0.03098 | Uani | 1.00 |
| H295  | H  | 0.05848  | 0.59044 | 0.48290 | 0.04900 | Uiso | 1.00 |
| C296  | C  | 0.07282  | 0.58780 | 0.17113 | 0.03150 | Uani | 1.00 |
| H297  | H  | 0.09569  | 0.59417 | 0.07558 | 0.04900 | Uiso | 1.00 |
| C298  | C  | 0.24598  | 0.68031 | 0.39849 | 0.04581 | Uani | 1.00 |
| H299  | H  | 0.24572  | 0.70458 | 0.46724 | 0.07100 | Uiso | 1.00 |
| C300  | C  | 0.17945  | 0.65511 | 0.39145 | 0.05182 | Uani | 1.00 |
| H301  | H  | 0.12840  | 0.66039 | 0.45426 | 0.08000 | Uiso | 1.00 |
| C302  | C  | 0.31205  | 0.64402 | 0.23257 | 0.05210 | Uani | 1.00 |
| H303  | H  | 0.36372  | 0.64036 | 0.17035 | 0.08200 | Uiso | 1.00 |
| C304  | C  | 0.24544  | 0.61890 | 0.21930 | 0.05166 | Uani | 1.00 |
| H305  | H  | 0.24607  | 0.59561 | 0.14672 | 0.08000 | Uiso | 1.00 |
| N306  | N  | 0.98080  | 0.57932 | 0.86310 | 0.08831 | Uani | 1.00 |
| O307  | O  | 0.97765  | 0.61350 | 0.92372 | 0.12192 | Uani | 1.00 |
| O308  | O  | 1.00151  | 0.57906 | 0.74246 | 0.13435 | Uani | 1.00 |
| Zn309 | Zn | 0.40037  | 0.70921 | 0.33511 | 0.02352 | Uani | 1.00 |
| N310  | N  | 0.37192  | 0.74354 | 0.57646 | 0.02441 | Uani | 1.00 |
| N311  | N  | 0.37210  | 0.75034 | 0.45108 | 0.02828 | Uani | 1.00 |
| N312  | N  | 0.16005  | 0.90466 | 0.57910 | 0.03404 | Uani | 1.00 |
| O313  | O  | 0.42831  | 0.73044 | 0.17728 | 0.08862 | Uani | 1.00 |
| C314  | C  | 0.31505  | 0.80326 | 0.54316 | 0.02864 | Uani | 1.00 |

|       |    |         |         |          |         |      |      |
|-------|----|---------|---------|----------|---------|------|------|
| C315  | C  | 0.26491 | 0.83961 | 0.56066  | 0.03438 | Uani | 1.00 |
| C316  | C  | 0.33707 | 0.77510 | 0.63575  | 0.03110 | Uani | 1.00 |
| H317  | H  | 0.32714 | 0.77702 | 0.73830  | 0.04900 | Uiso | 1.00 |
| C318  | C  | 0.33846 | 0.78665 | 0.42735  | 0.03180 | Uani | 1.00 |
| H319  | H  | 0.32705 | 0.79893 | 0.33266  | 0.04900 | Uiso | 1.00 |
| C320  | C  | 0.14973 | 0.87185 | 0.65758  | 0.04649 | Uani | 1.00 |
| H321  | H  | 0.10022 | 0.87079 | 0.72498  | 0.07100 | Uiso | 1.00 |
| C322  | C  | 0.20269 | 0.83922 | 0.65174  | 0.05262 | Uani | 1.00 |
| H323  | H  | 0.19304 | 0.81327 | 0.71425  | 0.08000 | Uiso | 1.00 |
| C324  | C  | 0.22150 | 0.90639 | 0.49244  | 0.05284 | Uani | 1.00 |
| H325  | H  | 0.22775 | 0.93261 | 0.43015  | 0.08200 | Uiso | 1.00 |
| C326  | C  | 0.27445 | 0.87366 | 0.48033  | 0.05247 | Uani | 1.00 |
| H327  | H  | 0.32187 | 0.87474 | 0.40861  | 0.08000 | Uiso | 1.00 |
| N328  | N  | 0.36087 | 0.74138 | 0.11399  | 0.08794 | Uani | 1.00 |
| O329  | O  | 0.29175 | 0.74205 | 0.17242  | 0.12253 | Uani | 1.00 |
| O330  | O  | 0.36558 | 0.75236 | -0.00594 | 0.13427 | Uani | 1.00 |
| Zn331 | Zn | 0.60042 | 0.79247 | 0.84040  | 0.02356 | Uani | 1.00 |
| N332  | N  | 0.62860 | 0.75716 | 0.08137  | 0.02436 | Uani | 1.00 |
| N333  | N  | 0.62848 | 0.75100 | 0.95604  | 0.02828 | Uani | 1.00 |
| N334  | N  | 0.84621 | 0.59732 | 0.07726  | 0.03394 | Uani | 1.00 |
| O335  | O  | 0.57366 | 0.77187 | 0.68328  | 0.08820 | Uani | 1.00 |
| C336  | C  | 0.68935 | 0.69851 | 0.04532  | 0.02851 | Uani | 1.00 |
| C337  | C  | 0.74114 | 0.66248 | 0.05984  | 0.03430 | Uani | 1.00 |
| C338  | C  | 0.66575 | 0.72580 | 0.13908  | 0.03103 | Uani | 1.00 |
| H339  | H  | 0.67646 | 0.72357 | 0.24116  | 0.04900 | Uiso | 1.00 |
| C340  | C  | 0.66420 | 0.71541 | 0.93077  | 0.03170 | Uani | 1.00 |
| H341  | H  | 0.67605 | 0.70399 | 0.83543  | 0.04900 | Uiso | 1.00 |
| C342  | C  | 0.85162 | 0.62823 | 0.16241  | 0.04616 | Uani | 1.00 |
| H343  | H  | 0.89723 | 0.62776 | 0.23507  | 0.07100 | Uiso | 1.00 |
| C344  | C  | 0.79826 | 0.66076 | 0.15723  | 0.05223 | Uani | 1.00 |
| H345  | H  | 0.80369 | 0.68501 | 0.22587  | 0.08000 | Uiso | 1.00 |
| C346  | C  | 0.79102 | 0.59806 | -0.01762 | 0.05220 | Uani | 1.00 |
| H347  | H  | 0.79020 | 0.57384 | 0.91328  | 0.08200 | Uiso | 1.00 |
| C348  | C  | 0.73822 | 0.63085 | 0.97078  | 0.05197 | Uani | 1.00 |
| H349  | H  | 0.69572 | 0.63157 | 0.89295  | 0.08000 | Uiso | 1.00 |
| N350  | N  | 0.64136 | 0.76084 | 0.61925  | 0.08815 | Uani | 1.00 |
| O351  | O  | 0.71067 | 0.76180 | 0.67463  | 0.12220 | Uani | 1.00 |
| O352  | O  | 0.63686 | 0.74863 | 0.50131  | 0.13418 | Uani | 1.00 |
| C353  | C  | 0.55931 | 0.57305 | 1.01186  | 0.00000 | Uiso | 1.00 |
| C354  | C  | 0.47591 | 0.57281 | 1.03176  | 0.00000 | Uiso | 1.00 |
| C355  | C  | 0.42540 | 0.55631 | 0.93889  | 0.00000 | Uiso | 1.00 |
| C356  | C  | 0.45987 | 0.54005 | 0.82802  | 0.00000 | Uiso | 1.00 |
| C357  | C  | 0.54132 | 0.54080 | 0.80859  | 0.00000 | Uiso | 1.00 |
| C358  | C  | 0.59246 | 0.55670 | 0.89955  | 0.00000 | Uiso | 1.00 |
| N359  | N  | 0.56530 | 0.52684 | 0.69457  | 0.00000 | Uiso | 1.00 |
| C360  | C  | 0.50152 | 0.51474 | 0.62648  | 0.00000 | Uiso | 1.00 |
| S361  | S  | 0.40963 | 0.51969 | 0.70331  | 0.00000 | Uiso | 1.00 |
| C362  | C  | 0.51056 | 0.50243 | 0.49057  | 0.00000 | Uiso | 1.00 |
| C363  | C  | 0.58470 | 0.48838 | 0.44179  | 0.00000 | Uiso | 1.00 |
| C364  | C  | 0.59465 | 0.48238 | 0.30933  | 0.00000 | Uiso | 1.00 |
| C365  | C  | 0.53056 | 0.48794 | 0.22652  | 0.00000 | Uiso | 1.00 |
| C366  | C  | 0.45487 | 0.49859 | 0.27547  | 0.00000 | Uiso | 1.00 |
| C367  | C  | 0.44581 | 0.50672 | 0.40655  | 0.00000 | Uiso | 1.00 |

|      |   |         |         |         |         |      |      |
|------|---|---------|---------|---------|---------|------|------|
| C368 | C | 0.38462 | 0.50065 | 0.19043 | 0.00000 | Uiso | 1.00 |
| O369 | O | 0.64696 | 0.47912 | 0.52565 | 0.00000 | Uiso | 1.00 |
| H370 | H | 0.59802 | 0.58629 | 1.08214 | 0.00000 | Uiso | 1.00 |
| H371 | H | 0.45078 | 0.58531 | 1.11891 | 0.00000 | Uiso | 1.00 |
| H372 | H | 0.36107 | 0.55640 | 0.95285 | 0.00000 | Uiso | 1.00 |
| H373 | H | 0.65628 | 0.55673 | 0.88271 | 0.00000 | Uiso | 1.00 |
| H374 | H | 0.65203 | 0.47305 | 0.27061 | 0.00000 | Uiso | 1.00 |
| H375 | H | 0.53964 | 0.48308 | 0.12455 | 0.00000 | Uiso | 1.00 |
| H376 | H | 0.38778 | 0.51609 | 0.44256 | 0.00000 | Uiso | 1.00 |
| O377 | O | 0.37998 | 0.47753 | 0.07876 | 0.00000 | Uiso | 1.00 |
| H378 | H | 0.69429 | 0.46554 | 0.48206 | 0.00000 | Uiso | 1.00 |
| O379 | O | 0.33030 | 0.52419 | 0.21486 | 0.00000 | Uiso | 1.00 |
| C380 | C | 0.39694 | 0.43537 | 0.09396 | 0.00000 | Uiso | 1.00 |
| H381 | H | 0.42985 | 0.42477 | 0.00746 | 0.00000 | Uiso | 1.00 |
| H382 | H | 0.33951 | 0.41904 | 0.10457 | 0.00000 | Uiso | 1.00 |
| H383 | H | 0.43329 | 0.42760 | 0.17926 | 0.00000 | Uiso | 1.00 |

**Table S8.** Atomic coordinates of optimized HBT2@DCF-20 models.

| label | type_symbol | x       | y       | z       | U_iso_or_equiv | adp_type | occupancy |
|-------|-------------|---------|---------|---------|----------------|----------|-----------|
| Zn1   | Zn          | 0.42103 | 0.19493 | 0.65114 | 0.02351        | Uani     | 1.00      |
| N2    | N           | 0.49289 | 0.18031 | 0.41031 | 0.02423        | Uani     | 1.00      |
| N3    | N           | 0.50211 | 0.17829 | 0.53733 | 0.02806        | Uani     | 1.00      |
| N4    | N           | 0.81708 | 0.07835 | 0.40973 | 0.03341        | Uani     | 1.00      |
| O5    | O           | 0.46051 | 0.20439 | 0.81382 | 0.08912        | Uani     | 1.00      |
| C6    | C           | 0.60803 | 0.14995 | 0.44816 | 0.02829        | Uani     | 1.00      |
| C7    | C           | 0.68186 | 0.12638 | 0.43194 | 0.03396        | Uani     | 1.00      |
| C8    | C           | 0.55610 | 0.16276 | 0.35254 | 0.03081        | Uani     | 1.00      |
| H9    | H           | 0.56394 | 0.15984 | 0.24892 | 0.04900        | Uiso     | 1.00      |
| C10   | C           | 0.57219 | 0.16042 | 0.56393 | 0.03127        | Uani     | 1.00      |
| H11   | H           | 0.59415 | 0.15411 | 0.66023 | 0.04900        | Uiso     | 1.00      |
| C12   | C           | 0.75251 | 0.07014 | 0.33490 | 0.04552        | Uani     | 1.00      |
| H13   | H           | 0.75334 | 0.04480 | 0.26841 | 0.07100        | Uiso     | 1.00      |
| C14   | C           | 0.68460 | 0.09440 | 0.34269 | 0.05140        | Uani     | 1.00      |
| H15   | H           | 0.63379 | 0.08739 | 0.28253 | 0.08000        | Uiso     | 1.00      |
| C16   | C           | 0.81649 | 0.10970 | 0.49590 | 0.05162        | Uani     | 1.00      |
| H17   | H           | 0.86817 | 0.11525 | 0.55544 | 0.08200        | Uiso     | 1.00      |
| C18   | C           | 0.74838 | 0.13398 | 0.50996 | 0.05131        | Uani     | 1.00      |
| H19   | H           | 0.74757 | 0.15839 | 0.58055 | 0.08000        | Uiso     | 1.00      |
| N20   | N           | 0.47548 | 0.16807 | 0.87241 | 0.08782        | Uani     | 1.00      |
| O21   | O           | 0.47106 | 0.13405 | 0.80839 | 0.12143        | Uani     | 1.00      |
| O22   | O           | 0.49643 | 0.16729 | 0.99337 | 0.13360        | Uani     | 1.00      |
| Zn23  | Zn          | 0.58240 | 0.30811 | 0.15622 | 0.02349        | Uani     | 1.00      |
| N24   | N           | 0.51260 | 0.32316 | 0.91346 | 0.02425        | Uani     | 1.00      |
| N25   | N           | 0.50356 | 0.32645 | 0.04036 | 0.02805        | Uani     | 1.00      |
| N26   | N           | 0.18563 | 0.42337 | 0.90326 | 0.03343        | Uani     | 1.00      |
| O27   | O           | 0.53883 | 0.29916 | 0.31714 | 0.08940        | Uani     | 1.00      |
| C28   | C           | 0.39748 | 0.35407 | 0.94956 | 0.02834        | Uani     | 1.00      |
| C29   | C           | 0.32250 | 0.37660 | 0.93073 | 0.03398        | Uani     | 1.00      |
| C30   | C           | 0.44944 | 0.34022 | 0.85484 | 0.03082        | Uani     | 1.00      |

|      |    |         |          |          |         |      |      |
|------|----|---------|----------|----------|---------|------|------|
| H31  | H  | 0.44112 | 0.34164  | 0.75115  | 0.04900 | Uiso | 1.00 |
| C32  | C  | 0.43341 | 0.34470  | 0.06594  | 0.03130 | Uani | 1.00 |
| H33  | H  | 0.41083 | 0.35142  | 0.16185  | 0.04900 | Uiso | 1.00 |
| C34  | C  | 0.24983 | 0.43075  | 0.82558  | 0.04560 | Uani | 1.00 |
| H35  | H  | 0.24786 | 0.45489  | 0.75453  | 0.07100 | Uiso | 1.00 |
| C36  | C  | 0.31841 | 0.40701  | 0.83576  | 0.05152 | Uani | 1.00 |
| H37  | H  | 0.36880 | 0.41321  | 0.77291  | 0.08000 | Uiso | 1.00 |
| C38  | C  | 0.18728 | 0.39329  | 0.99444  | 0.05186 | Uani | 1.00 |
| H39  | H  | 0.13596 | 0.38837  | 0.05626  | 0.08200 | Uiso | 1.00 |
| C40  | C  | 0.25610 | 0.36967  | 0.01103  | 0.05147 | Uani | 1.00 |
| H41  | H  | 0.25773 | 0.34648  | 0.08601  | 0.08000 | Uiso | 1.00 |
| N42  | N  | 0.52536 | 0.33572  | 0.37482  | 0.08772 | Uani | 1.00 |
| O43  | O  | 0.53256 | 0.36965  | 0.31020  | 0.12143 | Uani | 1.00 |
| O44  | O  | 0.50377 | 0.33689  | 0.49582  | 0.13357 | Uani | 1.00 |
| Zn45 | Zn | 0.09526 | 0.45816  | 0.88648  | 0.02336 | Uani | 1.00 |
| N46  | N  | 0.12488 | 0.49304  | 0.64280  | 0.02425 | Uani | 1.00 |
| N47  | N  | 0.12138 | 0.50024  | 0.76870  | 0.02815 | Uani | 1.00 |
| N48  | N  | 0.34193 | 0.15367  | 0.65558  | 0.03388 | Uani | 1.00 |
| O49  | O  | 0.06520 | 0.47876  | 0.04432  | 0.08742 | Uani | 1.00 |
| C50  | C  | 0.18230 | 0.05387  | 0.68852  | 0.02841 | Uani | 1.00 |
| C51  | C  | 0.23407 | 0.08978  | 0.67157  | 0.03419 | Uani | 1.00 |
| C52  | C  | 0.16242 | 0.52434  | 0.58402  | 0.03089 | Uani | 1.00 |
| H53  | H  | 0.17210 | 0.02727  | 0.49250  | 0.04900 | Uiso | 1.00 |
| C54  | C  | 0.15810 | 0.03722  | 0.80528  | 0.03167 | Uani | 1.00 |
| H55  | H  | 0.16971 | 0.04935  | 0.90063  | 0.04900 | Uiso | 1.00 |
| C56  | C  | 0.35126 | 0.12057  | 0.57734  | 0.04628 | Uani | 1.00 |
| H57  | H  | 0.40126 | 0.11873  | 0.51145  | 0.07100 | Uiso | 1.00 |
| C58  | C  | 0.29694 | 0.08850  | 0.58218  | 0.05243 | Uani | 1.00 |
| H59  | H  | 0.30598 | 0.06221  | 0.52037  | 0.08000 | Uiso | 1.00 |
| C60  | C  | 0.28006 | 0.15626  | 0.74073  | 0.05231 | Uani | 1.00 |
| H61  | H  | 0.27459 | 0.18270  | 0.80283  | 0.08200 | Uiso | 1.00 |
| C62  | C  | 0.22552 | 0.12415  | 0.75151  | 0.05213 | Uani | 1.00 |
| H63  | H  | 0.17778 | 0.12589  | 0.82226  | 0.08000 | Uiso | 1.00 |
| N64  | N  | 0.13150 | 0.49220  | 0.10504  | 0.08748 | Uani | 1.00 |
| O65  | O  | 0.19871 | 0.49513  | 0.04308  | 0.12204 | Uani | 1.00 |
| O66  | O  | 0.12770 | 0.50276  | 0.22610  | 0.13424 | Uani | 1.00 |
| Zn67 | Zn | 0.90644 | 0.04314  | 0.39662  | 0.02334 | Uani | 1.00 |
| N68  | N  | 0.87864 | 0.00841  | 0.15390  | 0.02422 | Uani | 1.00 |
| N69  | N  | 0.88067 | 0.00126  | 0.28000  | 0.02812 | Uani | 1.00 |
| N70  | N  | 0.66456 | 0.34777  | 0.16512  | 0.03382 | Uani | 1.00 |
| O71  | O  | 0.93390 | 0.02245  | 0.55578  | 0.08761 | Uani | 1.00 |
| C72  | C  | 0.82572 | 0.44706  | 0.20006  | 0.02838 | Uani | 1.00 |
| C73  | C  | 0.77520 | 0.41050  | 0.18305  | 0.03416 | Uani | 1.00 |
| C74  | C  | 0.84162 | -0.02290 | 0.09552  | 0.03084 | Uani | 1.00 |
| H75  | H  | 0.83920 | 0.47326  | 0.00297  | 0.04900 | Uiso | 1.00 |
| C76  | C  | 0.84720 | 0.46454  | 0.31659  | 0.03162 | Uani | 1.00 |
| H77  | H  | 0.83460 | 0.45275  | 0.41240  | 0.04900 | Uiso | 1.00 |
| C78  | C  | 0.66650 | 0.37749  | 0.07298  | 0.04610 | Uani | 1.00 |
| H79  | H  | 0.62362 | 0.37746  | -0.00452 | 0.07100 | Uiso | 1.00 |
| C80  | C  | 0.72403 | 0.40801  | 0.07680  | 0.05228 | Uani | 1.00 |
| H81  | H  | 0.72567 | 0.43055  | 0.00017  | 0.08000 | Uiso | 1.00 |
| C82  | C  | 0.71672 | 0.34787  | 0.26558  | 0.05217 | Uani | 1.00 |
| H83  | H  | 0.71321 | 0.32423  | 0.33887  | 0.08200 | Uiso | 1.00 |



|       |    |          |          |         |         |      |      |
|-------|----|----------|----------|---------|---------|------|------|
| C84   | C  | 0.77181  | 0.37968  | 0.27801 | 0.05194 | Uani | 1.00 |
| H85   | H  | 0.81047  | 0.38044  | 0.36157 | 0.08000 | Uiso | 1.00 |
| N86   | N  | 0.86680  | 0.01091  | 0.61980 | 0.08749 | Uani | 1.00 |
| O87   | O  | 0.79837  | 0.01033  | 0.56182 | 0.12168 | Uani | 1.00 |
| O88   | O  | 0.87109  | -0.00035 | 0.74029 | 0.13407 | Uani | 1.00 |
| Zn89  | Zn | 0.08292  | 0.44442  | 0.57276 | 0.02351 | Uani | 1.00 |
| N90   | N  | 0.00963  | 0.42961  | 0.81226 | 0.02424 | Uani | 1.00 |
| N91   | N  | 0.00085  | 0.42785  | 0.68521 | 0.02807 | Uani | 1.00 |
| N92   | N  | 0.68809  | 0.32602  | 0.81817 | 0.03341 | Uani | 1.00 |
| O93   | O  | 0.04445  | 0.45378  | 0.40933 | 0.08912 | Uani | 1.00 |
| C94   | C  | 0.89611  | 0.39801  | 0.77346 | 0.02831 | Uani | 1.00 |
| C95   | C  | 0.82339  | 0.37356  | 0.78945 | 0.03396 | Uani | 1.00 |
| C96   | C  | -0.05291 | 0.41126  | 0.86952 | 0.03082 | Uani | 1.00 |
| H97   | H  | 0.93916  | 0.40798  | 0.97308 | 0.04900 | Uiso | 1.00 |
| C98   | C  | 0.93170  | 0.40922  | 0.65798 | 0.03129 | Uani | 1.00 |
| H99   | H  | 0.91061  | 0.40256  | 0.56156 | 0.04900 | Uiso | 1.00 |
| C100  | C  | 0.75400  | 0.31724  | 0.88944 | 0.04558 | Uani | 1.00 |
| H101  | H  | 0.75358  | 0.29202  | 0.95700 | 0.07100 | Uiso | 1.00 |
| C102  | C  | 0.82211  | 0.34121  | 0.87814 | 0.05145 | Uani | 1.00 |
| H103  | H  | 0.87379  | 0.33408  | 0.93637 | 0.08000 | Uiso | 1.00 |
| C104  | C  | 0.68779  | 0.35728  | 0.73106 | 0.05168 | Uani | 1.00 |
| H105  | H  | 0.63496  | 0.36326  | 0.67450 | 0.08200 | Uiso | 1.00 |
| C106  | C  | 0.75582  | 0.38135  | 0.71386 | 0.05138 | Uani | 1.00 |
| H107  | H  | 0.75545  | 0.40603  | 0.64375 | 0.08000 | Uiso | 1.00 |
| N108  | N  | 0.02946  | 0.41743  | 0.35169 | 0.08784 | Uani | 1.00 |
| O109  | O  | 0.03458  | 0.38342  | 0.41623 | 0.12161 | Uani | 1.00 |
| O110  | O  | 0.00758  | 0.41662  | 0.23120 | 0.13380 | Uani | 1.00 |
| Zn111 | Zn | 0.92095  | 0.05718  | 0.08290 | 0.02348 | Uani | 1.00 |
| N112  | N  | 0.99344  | 0.07123  | 0.32231 | 0.02423 | Uani | 1.00 |
| N113  | N  | 1.00262  | 0.07349  | 0.19520 | 0.02804 | Uani | 1.00 |
| N114  | N  | 0.31681  | 0.17379  | 0.32235 | 0.03338 | Uani | 1.00 |
| O115  | O  | 0.96055  | 0.04754  | 0.91979 | 0.08944 | Uani | 1.00 |
| C116  | C  | 0.10824  | 0.10199  | 0.28319 | 0.02831 | Uani | 1.00 |
| C117  | C  | 0.18175  | 0.12580  | 0.29901 | 0.03396 | Uani | 1.00 |
| C118  | C  | 1.05640  | 0.08883  | 0.37935 | 0.03079 | Uani | 1.00 |
| H119  | H  | 0.06395  | 0.09174  | 0.48287 | 0.04900 | Uiso | 1.00 |
| C120  | C  | 0.07252  | 0.09161  | 0.16778 | 0.03126 | Uani | 1.00 |
| H121  | H  | 0.09427  | 0.09833  | 0.07125 | 0.04900 | Uiso | 1.00 |
| C122  | C  | 0.25209  | 0.18152  | 0.39858 | 0.04549 | Uani | 1.00 |
| H123  | H  | 0.25287  | 0.20640  | 0.46685 | 0.07100 | Uiso | 1.00 |
| C124  | C  | 0.18428  | 0.15726  | 0.39020 | 0.05141 | Uani | 1.00 |
| H125  | H  | 0.13340  | 0.16382  | 0.45168 | 0.08000 | Uiso | 1.00 |
| C126  | C  | 0.31638  | 0.14301  | 0.23412 | 0.05171 | Uani | 1.00 |
| H127  | H  | 0.36816  | 0.13786  | 0.17351 | 0.08200 | Uiso | 1.00 |
| C128  | C  | 0.24842  | 0.11879  | 0.21948 | 0.05133 | Uani | 1.00 |
| H129  | H  | 0.24792  | 0.09481  | 0.14742 | 0.08000 | Uiso | 1.00 |
| N130  | N  | 0.97629  | 0.08378  | 0.86113 | 0.08779 | Uani | 1.00 |
| O131  | O  | 0.97125  | 0.11785  | 0.92483 | 0.12132 | Uani | 1.00 |
| O132  | O  | 0.99828  | 0.08443  | 0.74028 | 0.13365 | Uani | 1.00 |
| Zn133 | Zn | 0.40646  | 0.20874  | 0.33658 | 0.02335 | Uani | 1.00 |
| N134  | N  | 0.37919  | 0.24356  | 0.58032 | 0.02425 | Uani | 1.00 |
| N135  | N  | 0.38069  | 0.25054  | 0.45406 | 0.02815 | Uani | 1.00 |
| N136  | N  | 0.16185  | 0.40308  | 0.57156 | 0.03390 | Uani | 1.00 |

|       |    |         |         |          |         |      |      |
|-------|----|---------|---------|----------|---------|------|------|
| O137  | O  | 0.43559 | 0.22979 | 0.17818  | 0.08755 | Uani | 1.00 |
| C138  | C  | 0.32285 | 0.30369 | 0.54619  | 0.02843 | Uani | 1.00 |
| C139  | C  | 0.27089 | 0.33959 | 0.56164  | 0.03420 | Uani | 1.00 |
| C140  | C  | 0.34348 | 0.27520 | 0.63966  | 0.03089 | Uani | 1.00 |
| H141  | H  | 0.33098 | 0.27670 | 0.74243  | 0.04900 | Uiso | 1.00 |
| C142  | C  | 0.34766 | 0.28714 | 0.42991  | 0.03168 | Uani | 1.00 |
| H143  | H  | 0.33671 | 0.29940 | 0.33429  | 0.04900 | Uiso | 1.00 |
| C144  | C  | 0.15161 | 0.36992 | 0.64982  | 0.04630 | Uani | 1.00 |
| H145  | H  | 0.10058 | 0.36794 | 0.71353  | 0.07100 | Uiso | 1.00 |
| C146  | C  | 0.20646 | 0.33802 | 0.64797  | 0.05247 | Uani | 1.00 |
| H147  | H  | 0.19670 | 0.31165 | 0.70956  | 0.08000 | Uiso | 1.00 |
| C148  | C  | 0.22526 | 0.40598 | 0.48969  | 0.05242 | Uani | 1.00 |
| H149  | H  | 0.23131 | 0.43250 | 0.42790  | 0.08200 | Uiso | 1.00 |
| C150  | C  | 0.28065 | 0.37412 | 0.48233  | 0.05220 | Uani | 1.00 |
| H151  | H  | 0.32998 | 0.37608 | 0.41470  | 0.08000 | Uiso | 1.00 |
| N152  | N  | 0.36942 | 0.24224 | 0.11434  | 0.08740 | Uani | 1.00 |
| O153  | O  | 0.30021 | 0.24231 | 0.17107  | 0.12194 | Uani | 1.00 |
| O154  | O  | 0.37545 | 0.25490 | -0.00465 | 0.13405 | Uani | 1.00 |
| Zn155 | Zn | 0.59671 | 0.29267 | 0.83990  | 0.02336 | Uani | 1.00 |
| N156  | N  | 0.62320 | 0.25881 | 0.08628  | 0.02423 | Uani | 1.00 |
| N157  | N  | 0.62111 | 0.25131 | 0.96043  | 0.02814 | Uani | 1.00 |
| N158  | N  | 0.84196 | 0.09891 | 0.08017  | 0.03385 | Uani | 1.00 |
| O159  | O  | 0.56501 | 0.27127 | 0.68428  | 0.08744 | Uani | 1.00 |
| C160  | C  | 0.68127 | 0.19887 | 0.05329  | 0.02837 | Uani | 1.00 |
| C161  | C  | 0.73357 | 0.16295 | 0.06862  | 0.03416 | Uani | 1.00 |
| C162  | C  | 0.66055 | 0.22766 | 0.14589  | 0.03085 | Uani | 1.00 |
| H163  | H  | 0.67407 | 0.22672 | 0.24815  | 0.04900 | Uiso | 1.00 |
| C164  | C  | 0.65509 | 0.21487 | 0.93719  | 0.03163 | Uani | 1.00 |
| H165  | H  | 0.66601 | 0.20244 | 0.84184  | 0.04900 | Uiso | 1.00 |
| C166  | C  | 0.85211 | 0.13218 | 0.15731  | 0.04613 | Uani | 1.00 |
| H167  | H  | 0.90285 | 0.13404 | 0.22080  | 0.07100 | Uiso | 1.00 |
| C168  | C  | 0.79760 | 0.16432 | 0.15473  | 0.05229 | Uani | 1.00 |
| H169  | H  | 0.80729 | 0.19068 | 0.21574  | 0.08000 | Uiso | 1.00 |
| C170  | C  | 0.77903 | 0.09627 | -0.00179 | 0.05214 | Uani | 1.00 |
| H171  | H  | 0.77271 | 0.06972 | 0.93695  | 0.08200 | Uiso | 1.00 |
| C172  | C  | 0.72419 | 0.12840 | 0.98984  | 0.05196 | Uani | 1.00 |
| H173  | H  | 0.67544 | 0.12649 | 0.92184  | 0.08000 | Uiso | 1.00 |
| N174  | N  | 0.63029 | 0.25952 | 0.61591  | 0.08748 | Uani | 1.00 |
| O175  | O  | 0.69974 | 0.25735 | 0.67027  | 0.12172 | Uani | 1.00 |
| O176  | O  | 0.62301 | 0.24913 | 0.49526  | 0.13397 | Uani | 1.00 |
| Zn177 | Zn | 0.41834 | 0.69559 | 0.65461  | 0.02351 | Uani | 1.00 |
| N178  | N  | 0.49278 | 0.68122 | 0.41619  | 0.02423 | Uani | 1.00 |
| N179  | N  | 0.50101 | 0.67945 | 0.54338  | 0.02806 | Uani | 1.00 |
| N180  | N  | 0.81670 | 0.57868 | 0.42278  | 0.03341 | Uani | 1.00 |
| O181  | O  | 0.45623 | 0.70539 | 0.81790  | 0.08912 | Uani | 1.00 |
| C182  | C  | 0.60696 | 0.65018 | 0.45735  | 0.02829 | Uani | 1.00 |
| C183  | C  | 0.68081 | 0.62640 | 0.44340  | 0.03396 | Uani | 1.00 |
| C184  | C  | 0.55600 | 0.66306 | 0.36023  | 0.03081 | Uani | 1.00 |
| H185  | H  | 0.56428 | 0.65955 | 0.25688  | 0.04900 | Uiso | 1.00 |
| C186  | C  | 0.57037 | 0.66117 | 0.57202  | 0.03127 | Uani | 1.00 |
| H187  | H  | 0.59106 | 0.65472 | 0.66898  | 0.04900 | Uiso | 1.00 |
| C188  | C  | 0.75385 | 0.57152 | 0.34340  | 0.04552 | Uani | 1.00 |
| H189  | H  | 0.75700 | 0.54745 | 0.27296  | 0.07100 | Uiso | 1.00 |

|       |    |         |         |         |         |      |      |
|-------|----|---------|---------|---------|---------|------|------|
| C190  | C  | 0.68560 | 0.59555 | 0.35043 | 0.05140 | Uani | 1.00 |
| H191  | H  | 0.63630 | 0.58933 | 0.28614 | 0.08000 | Uiso | 1.00 |
| C192  | C  | 0.81408 | 0.60885 | 0.51300 | 0.05162 | Uani | 1.00 |
| H193  | H  | 0.86434 | 0.61357 | 0.57635 | 0.08200 | Uiso | 1.00 |
| C194  | C  | 0.74563 | 0.63296 | 0.52620 | 0.05131 | Uani | 1.00 |
| H195  | H  | 0.74336 | 0.65650 | 0.59966 | 0.08000 | Uiso | 1.00 |
| N196  | N  | 0.47231 | 0.66909 | 0.87541 | 0.08782 | Uani | 1.00 |
| O197  | O  | 0.46581 | 0.63518 | 0.81145 | 0.12143 | Uani | 1.00 |
| O198  | O  | 0.49589 | 0.66815 | 0.99504 | 0.13360 | Uani | 1.00 |
| Zn199 | Zn | 0.58252 | 0.80679 | 0.16064 | 0.02349 | Uani | 1.00 |
| N200  | N  | 0.51121 | 0.82066 | 0.91993 | 0.02425 | Uani | 1.00 |
| N201  | N  | 0.50133 | 0.82303 | 0.04684 | 0.02805 | Uani | 1.00 |
| N202  | N  | 0.18748 | 0.92339 | 0.91337 | 0.03343 | Uani | 1.00 |
| O203  | O  | 0.54244 | 0.79695 | 0.32355 | 0.08940 | Uani | 1.00 |
| C204  | C  | 0.39601 | 0.85142 | 0.95650 | 0.02834 | Uani | 1.00 |
| C205  | C  | 0.32238 | 0.87516 | 0.93891 | 0.03398 | Uani | 1.00 |
| C206  | C  | 0.44839 | 0.83811 | 0.86148 | 0.03082 | Uani | 1.00 |
| H207  | H  | 0.44125 | 0.84077 | 0.75777 | 0.04900 | Uiso | 1.00 |
| C208  | C  | 0.43124 | 0.84121 | 0.07274 | 0.03130 | Uani | 1.00 |
| H209  | H  | 0.40900 | 0.84805 | 0.16878 | 0.04900 | Uiso | 1.00 |
| C210  | C  | 0.25201 | 0.93057 | 0.83612 | 0.04560 | Uani | 1.00 |
| H211  | H  | 0.25120 | 0.95521 | 0.76650 | 0.07100 | Uiso | 1.00 |
| C212  | C  | 0.31972 | 0.90616 | 0.84556 | 0.05152 | Uani | 1.00 |
| H213  | H  | 0.37050 | 0.91235 | 0.78345 | 0.08000 | Uiso | 1.00 |
| C214  | C  | 0.18793 | 0.89295 | 1.00334 | 0.05186 | Uani | 1.00 |
| H215  | H  | 0.13636 | 0.88828 | 0.06487 | 0.08200 | Uiso | 1.00 |
| C216  | C  | 0.25580 | 0.86863 | 0.01910 | 0.05147 | Uani | 1.00 |
| H217  | H  | 0.25639 | 0.84503 | 0.09285 | 0.08000 | Uiso | 1.00 |
| N218  | N  | 0.52658 | 0.83310 | 0.38213 | 0.08772 | Uani | 1.00 |
| O219  | O  | 0.53083 | 0.86724 | 0.31807 | 0.12143 | Uani | 1.00 |
| O220  | O  | 0.50507 | 0.83358 | 0.50321 | 0.13357 | Uani | 1.00 |
| Zn221 | Zn | 0.09844 | 0.95894 | 0.89981 | 0.02336 | Uani | 1.00 |
| N222  | N  | 0.12477 | 0.99407 | 0.65558 | 0.02425 | Uani | 1.00 |
| N223  | N  | 0.12441 | 1.00081 | 0.78184 | 0.02815 | Uani | 1.00 |
| N224  | N  | 0.34020 | 0.65360 | 0.65562 | 0.03388 | Uani | 1.00 |
| O225  | O  | 0.07096 | 0.97993 | 0.05864 | 0.08742 | Uani | 1.00 |
| C226  | C  | 0.18144 | 0.55304 | 0.67735 | 0.02841 | Uani | 1.00 |
| C227  | C  | 0.23292 | 0.58923 | 0.66360 | 0.03419 | Uani | 1.00 |
| C228  | C  | 0.16051 | 1.02562 | 0.59553 | 0.03089 | Uani | 1.00 |
| H229  | H  | 0.17677 | 0.52555 | 0.48180 | 0.04900 | Uiso | 1.00 |
| C230  | C  | 0.15403 | 0.53687 | 0.79272 | 0.03167 | Uani | 1.00 |
| H231  | H  | 0.16263 | 0.54967 | 0.88794 | 0.04900 | Uiso | 1.00 |
| C232  | C  | 0.35169 | 0.62066 | 0.57725 | 0.04628 | Uani | 1.00 |
| H233  | H  | 0.40302 | 0.61912 | 0.51410 | 0.07100 | Uiso | 1.00 |
| C234  | C  | 0.29745 | 0.58852 | 0.57741 | 0.05243 | Uani | 1.00 |
| H235  | H  | 0.30771 | 0.56266 | 0.51435 | 0.08000 | Uiso | 1.00 |
| C236  | C  | 0.27661 | 0.65567 | 0.73748 | 0.05231 | Uani | 1.00 |
| H237  | H  | 0.26932 | 0.68194 | 0.79982 | 0.08200 | Uiso | 1.00 |
| C238  | C  | 0.22239 | 0.62331 | 0.74425 | 0.05213 | Uani | 1.00 |
| H239  | H  | 0.17319 | 0.62471 | 0.81238 | 0.08000 | Uiso | 1.00 |
| N240  | N  | 0.13804 | 0.99163 | 0.12101 | 0.08748 | Uani | 1.00 |
| O241  | O  | 0.20650 | 0.99202 | 0.06189 | 0.12204 | Uani | 1.00 |
| O242  | O  | 0.13369 | 1.00320 | 0.24108 | 0.13424 | Uani | 1.00 |

|       |    |          |         |          |         |      |      |
|-------|----|----------|---------|----------|---------|------|------|
| Zn243 | Zn | 0.90595  | 0.54329 | 0.40863  | 0.02334 | Uani | 1.00 |
| N244  | N  | 0.88098  | 0.50763 | 0.16565  | 0.02422 | Uani | 1.00 |
| N245  | N  | 0.87999  | 0.50121 | 0.29216  | 0.02812 | Uani | 1.00 |
| N246  | N  | 0.66085  | 0.84862 | 0.16368  | 0.03382 | Uani | 1.00 |
| O247  | O  | 0.93383  | 0.52238 | 0.56734  | 0.08761 | Uani | 1.00 |
| C248  | C  | 0.82066  | 0.94865 | 0.18946  | 0.02838 | Uani | 1.00 |
| C249  | C  | 0.76848  | 0.91277 | 0.17526  | 0.03416 | Uani | 1.00 |
| C250  | C  | 0.84832  | 0.47530 | 0.10630  | 0.03084 | Uani | 1.00 |
| H251  | H  | 0.82861  | 0.97578 | -0.00686 | 0.04900 | Uiso | 1.00 |
| C252  | C  | 0.84667  | 0.96494 | 0.30496  | 0.03162 | Uani | 1.00 |
| H253  | H  | 0.83583  | 0.95274 | 0.40086  | 0.04900 | Uiso | 1.00 |
| C254  | C  | 0.65096  | 0.88173 | 0.08517  | 0.04610 | Uani | 1.00 |
| H255  | H  | 0.60080  | 0.88340 | 0.02039  | 0.07100 | Uiso | 1.00 |
| C256  | C  | 0.70509  | 0.91394 | 0.08787  | 0.05228 | Uani | 1.00 |
| H257  | H  | 0.69565  | 0.94018 | 0.02573  | 0.08000 | Uiso | 1.00 |
| C258  | C  | 0.72303  | 0.84621 | 0.24723  | 0.05217 | Uani | 1.00 |
| H259  | H  | 0.72906  | 0.81977 | 0.30953  | 0.08200 | Uiso | 1.00 |
| C260  | C  | 0.77744  | 0.87843 | 0.25576  | 0.05194 | Uani | 1.00 |
| H261  | H  | 0.82555  | 0.87674 | 0.32506  | 0.08000 | Uiso | 1.00 |
| N262  | N  | 0.86701  | 0.51035 | 0.63138  | 0.08749 | Uani | 1.00 |
| O263  | O  | 0.79828  | 0.51036 | 0.57452  | 0.12168 | Uani | 1.00 |
| O264  | O  | 0.87207  | 0.49797 | 0.75071  | 0.13407 | Uani | 1.00 |
| Zn265 | Zn | 0.08150  | 0.94580 | 0.58573  | 0.02351 | Uani | 1.00 |
| N266  | N  | 0.01086  | 0.93115 | 0.82778  | 0.02424 | Uani | 1.00 |
| N267  | N  | 0.00074  | 0.92940 | 0.70096  | 0.02807 | Uani | 1.00 |
| N268  | N  | 0.68794  | 0.82814 | 0.83338  | 0.03341 | Uani | 1.00 |
| O269  | O  | 0.04126  | 0.95567 | 0.42368  | 0.08912 | Uani | 1.00 |
| C270  | C  | 0.89565  | 0.90069 | 0.79210  | 0.02831 | Uani | 1.00 |
| C271  | C  | 0.82224  | 0.87681 | 0.80956  | 0.03396 | Uani | 1.00 |
| C272  | C  | -0.05182 | 0.91344 | 0.88672  | 0.03082 | Uani | 1.00 |
| H273  | H  | 0.94121  | 0.91021 | 0.99046  | 0.04900 | Uiso | 1.00 |
| C274  | C  | 0.93063  | 0.91146 | 0.67568  | 0.03129 | Uani | 1.00 |
| H275  | H  | 0.90820  | 0.90515 | 0.57981  | 0.04900 | Uiso | 1.00 |
| C276  | C  | 0.75257  | 0.82046 | 0.90890  | 0.04558 | Uani | 1.00 |
| H277  | H  | 0.75209  | 0.79528 | 0.97657  | 0.07100 | Uiso | 1.00 |
| C278  | C  | 0.82001  | 0.84504 | 0.90028  | 0.05145 | Uani | 1.00 |
| H279  | H  | 0.87087  | 0.83844 | 0.96097  | 0.08000 | Uiso | 1.00 |
| C280  | C  | 0.68803  | 0.85929 | 0.74589  | 0.05168 | Uani | 1.00 |
| H281  | H  | 0.63634  | 0.86442 | 0.68587  | 0.08200 | Uiso | 1.00 |
| C282  | C  | 0.75559  | 0.88388 | 0.73111  | 0.05138 | Uani | 1.00 |
| H283  | H  | 0.75588  | 0.90812 | 0.65953  | 0.08000 | Uiso | 1.00 |
| N284  | N  | 0.02600  | 0.91945 | 0.36546  | 0.08784 | Uani | 1.00 |
| O285  | O  | 0.02983  | 0.88538 | 0.42996  | 0.12161 | Uani | 1.00 |
| O286  | O  | 0.00522  | 0.91881 | 0.24443  | 0.13380 | Uani | 1.00 |
| Zn287 | Zn | 0.92244  | 0.55635 | 0.09387  | 0.02348 | Uani | 1.00 |
| N288  | N  | 0.99340  | 0.57121 | 0.33362  | 0.02423 | Uani | 1.00 |
| N289  | N  | 1.00324  | 0.57296 | 0.20651  | 0.02804 | Uani | 1.00 |
| N290  | N  | 0.31667  | 0.67368 | 0.32907  | 0.03338 | Uani | 1.00 |
| O291  | O  | 0.96184  | 0.54676 | 0.93056  | 0.08944 | Uani | 1.00 |
| C292  | C  | 0.10884  | 0.60132 | 0.29434  | 0.02831 | Uani | 1.00 |
| C293  | C  | 0.18230  | 0.62512 | 0.30942  | 0.03396 | Uani | 1.00 |
| C294  | C  | 1.05638  | 0.58882 | 0.39053  | 0.03079 | Uani | 1.00 |
| H295  | H  | 0.06363  | 0.59210 | 0.49395  | 0.04900 | Uiso | 1.00 |

|       |    |         |         |          |         |      |      |
|-------|----|---------|---------|----------|---------|------|------|
| C296  | C  | 0.07343 | 0.59072 | 0.17906  | 0.03126 | Uani | 1.00 |
| H297  | H  | 0.09572 | 0.59688 | 0.08248  | 0.04900 | Uiso | 1.00 |
| C298  | C  | 0.25125 | 0.68224 | 0.40282  | 0.04549 | Uani | 1.00 |
| H299  | H  | 0.25113 | 0.70803 | 0.46758  | 0.07100 | Uiso | 1.00 |
| C300  | C  | 0.18374 | 0.65777 | 0.39623  | 0.05141 | Uani | 1.00 |
| H301  | H  | 0.13226 | 0.66506 | 0.45553  | 0.08000 | Uiso | 1.00 |
| C302  | C  | 0.31731 | 0.64170 | 0.24518  | 0.05171 | Uani | 1.00 |
| H303  | H  | 0.36966 | 0.63585 | 0.18655  | 0.08200 | Uiso | 1.00 |
| C304  | C  | 0.24969 | 0.61712 | 0.23247  | 0.05133 | Uani | 1.00 |
| H305  | H  | 0.24995 | 0.59217 | 0.16378  | 0.08000 | Uiso | 1.00 |
| N306  | N  | 0.97644 | 0.58309 | 0.87162  | 0.08779 | Uani | 1.00 |
| O307  | O  | 0.97317 | 0.61704 | 0.93621  | 0.12132 | Uani | 1.00 |
| O308  | O  | 0.99586 | 0.58393 | 0.74964  | 0.13365 | Uani | 1.00 |
| Zn309 | Zn | 0.40570 | 0.70905 | 0.34125  | 0.02335 | Uani | 1.00 |
| N310  | N  | 0.37649 | 0.74411 | 0.58336  | 0.02425 | Uani | 1.00 |
| N311  | N  | 0.37881 | 0.75116 | 0.45723  | 0.02815 | Uani | 1.00 |
| N312  | N  | 0.16002 | 0.90419 | 0.58008  | 0.03390 | Uani | 1.00 |
| O313  | O  | 0.43350 | 0.72958 | 0.18171  | 0.08755 | Uani | 1.00 |
| C314  | C  | 0.31953 | 0.80408 | 0.54874  | 0.02843 | Uani | 1.00 |
| C315  | C  | 0.26750 | 0.84001 | 0.56442  | 0.03420 | Uani | 1.00 |
| C316  | C  | 0.34012 | 0.77561 | 0.64234  | 0.03089 | Uani | 1.00 |
| H317  | H  | 0.32727 | 0.77701 | 0.74501  | 0.04900 | Uiso | 1.00 |
| C318  | C  | 0.34534 | 0.78766 | 0.43273  | 0.03168 | Uani | 1.00 |
| H319  | H  | 0.33481 | 0.79992 | 0.33702  | 0.04900 | Uiso | 1.00 |
| C320  | C  | 0.15057 | 0.87106 | 0.65863  | 0.04630 | Uani | 1.00 |
| H321  | H  | 0.10073 | 0.86937 | 0.72486  | 0.07100 | Uiso | 1.00 |
| C322  | C  | 0.20469 | 0.83886 | 0.65401  | 0.05247 | Uani | 1.00 |
| H323  | H  | 0.19558 | 0.81262 | 0.71641  | 0.08000 | Uiso | 1.00 |
| C324  | C  | 0.22166 | 0.90662 | 0.49439  | 0.05242 | Uani | 1.00 |
| H325  | H  | 0.22719 | 0.93308 | 0.43195  | 0.08200 | Uiso | 1.00 |
| C326  | C  | 0.27604 | 0.87437 | 0.48384  | 0.05220 | Uani | 1.00 |
| H327  | H  | 0.32372 | 0.87604 | 0.41295  | 0.08000 | Uiso | 1.00 |
| N328  | N  | 0.36648 | 0.74157 | 0.11932  | 0.08740 | Uani | 1.00 |
| O329  | O  | 0.29799 | 0.74197 | 0.17832  | 0.12194 | Uani | 1.00 |
| O330  | O  | 0.37092 | 0.75354 | -0.00052 | 0.13405 | Uani | 1.00 |
| Zn331 | Zn | 0.59887 | 0.79269 | 0.84722  | 0.02336 | Uani | 1.00 |
| N332  | N  | 0.62592 | 0.75815 | 0.09109  | 0.02423 | Uani | 1.00 |
| N333  | N  | 0.62470 | 0.75093 | 0.96515  | 0.02814 | Uani | 1.00 |
| N334  | N  | 0.84335 | 0.59795 | 0.08985  | 0.03385 | Uani | 1.00 |
| O335  | O  | 0.57165 | 0.77178 | 0.68872  | 0.08744 | Uani | 1.00 |
| C336  | C  | 0.68397 | 0.69827 | 0.05809  | 0.02837 | Uani | 1.00 |
| C337  | C  | 0.73598 | 0.66230 | 0.07432  | 0.03416 | Uani | 1.00 |
| C338  | C  | 0.66249 | 0.72684 | 0.15089  | 0.03085 | Uani | 1.00 |
| H339  | H  | 0.67481 | 0.72558 | 0.25352  | 0.04900 | Uiso | 1.00 |
| C340  | C  | 0.65866 | 0.71449 | 0.94171  | 0.03163 | Uani | 1.00 |
| H341  | H  | 0.67001 | 0.70218 | 0.84629  | 0.04900 | Uiso | 1.00 |
| C342  | C  | 0.85276 | 0.63116 | 0.16749  | 0.04613 | Uani | 1.00 |
| H343  | H  | 0.90253 | 0.63287 | 0.23297  | 0.07100 | Uiso | 1.00 |
| C344  | C  | 0.79851 | 0.66337 | 0.16331  | 0.05229 | Uani | 1.00 |
| H345  | H  | 0.80739 | 0.68958 | 0.22529  | 0.08000 | Uiso | 1.00 |
| C346  | C  | 0.78178 | 0.59559 | 0.00510  | 0.05214 | Uani | 1.00 |
| H347  | H  | 0.77625 | 0.56916 | 0.94311  | 0.08200 | Uiso | 1.00 |
| C348  | C  | 0.72782 | 0.62801 | 0.99417  | 0.05196 | Uani | 1.00 |

|      |   |         |         |         |         |      |      |
|------|---|---------|---------|---------|---------|------|------|
| H349 | H | 0.68073 | 0.62659 | 0.92313 | 0.08000 | Uiso | 1.00 |
| N350 | N | 0.63880 | 0.76020 | 0.62513 | 0.08748 | Uani | 1.00 |
| O351 | O | 0.70725 | 0.75979 | 0.68315 | 0.12172 | Uani | 1.00 |
| O352 | O | 0.63460 | 0.74875 | 0.50501 | 0.13397 | Uani | 1.00 |
| C353 | C | 0.53954 | 0.56516 | 0.96474 | 0.00000 | Uiso | 1.00 |
| C354 | C | 0.46145 | 0.55432 | 1.00105 | 0.00000 | Uiso | 1.00 |
| C355 | C | 0.41251 | 0.53327 | 0.91411 | 0.00000 | Uiso | 1.00 |
| C356 | C | 0.44289 | 0.52355 | 0.79194 | 0.00000 | Uiso | 1.00 |
| C357 | C | 0.51885 | 0.53439 | 0.75598 | 0.00000 | Uiso | 1.00 |
| C358 | C | 0.56879 | 0.55520 | 0.84093 | 0.00000 | Uiso | 1.00 |
| N359 | N | 0.53866 | 0.52359 | 0.63495 | 0.00000 | Uiso | 1.00 |
| C360 | C | 0.47729 | 0.50400 | 0.57781 | 0.00000 | Uiso | 1.00 |
| S361 | S | 0.39307 | 0.49862 | 0.67369 | 0.00000 | Uiso | 1.00 |
| C362 | C | 0.48075 | 0.48997 | 0.44021 | 0.00000 | Uiso | 1.00 |
| C363 | C | 0.55223 | 0.49131 | 0.36643 | 0.00000 | Uiso | 1.00 |
| C364 | C | 0.55065 | 0.48179 | 0.23207 | 0.00000 | Uiso | 1.00 |
| C365 | C | 0.47965 | 0.46757 | 0.17708 | 0.00000 | Uiso | 1.00 |
| C366 | C | 0.41037 | 0.46412 | 0.25120 | 0.00000 | Uiso | 1.00 |
| C367 | C | 0.41093 | 0.47556 | 0.38125 | 0.00000 | Uiso | 1.00 |
| C368 | C | 0.33479 | 0.44937 | 0.19131 | 0.00000 | Uiso | 1.00 |
| O369 | O | 0.62324 | 0.50135 | 0.42913 | 0.00000 | Uiso | 1.00 |
| H370 | H | 0.57702 | 0.58118 | 1.03261 | 0.00000 | Uiso | 1.00 |
| H371 | H | 0.43921 | 0.56203 | 1.09649 | 0.00000 | Uiso | 1.00 |
| H372 | H | 0.35239 | 0.52480 | 0.94126 | 0.00000 | Uiso | 1.00 |
| H373 | H | 0.62868 | 0.56350 | 0.81207 | 0.00000 | Uiso | 1.00 |
| C374 | C | 0.62008 | 0.48881 | 0.14566 | 0.00000 | Uiso | 1.00 |
| H375 | H | 0.47772 | 0.45956 | 0.07534 | 0.00000 | Uiso | 1.00 |
| H376 | H | 0.35567 | 0.47371 | 0.43519 | 0.00000 | Uiso | 1.00 |
| H377 | H | 0.28457 | 0.46890 | 0.22356 | 0.00000 | Uiso | 1.00 |
| H378 | H | 0.32311 | 0.41750 | 0.22211 | 0.00000 | Uiso | 1.00 |
| H379 | H | 0.33824 | 0.45057 | 0.08398 | 0.00000 | Uiso | 1.00 |
| H380 | H | 0.67324 | 0.49073 | 0.38604 | 0.00000 | Uiso | 1.00 |
| O381 | O | 0.61550 | 0.48241 | 0.02971 | 0.00000 | Uiso | 1.00 |
| H382 | H | 0.67553 | 0.50042 | 0.18175 | 0.00000 | Uiso | 1.00 |

## References

1. G. M. Sheldrick, A short history of SHELX. *Acta Cryst.* 2008, A64, 112–122.
2. O. V. Dolomanov, L. J. Bourhis, R. J. Gildea, J. A. K. Howard, and H. Puschmann., OLEX2: a complete structure solution, refinement and analysis program. *J. Appl. Cryst.* 2009, 42, 339–341.
3. A. L. Spek, LATON SQUEEZE: a tool for the calculation of the disordered solvent contribution to the calculated structure factors. *Acta Crystallogr. Sect. C: Struct. Chem.*, 2015, 71, 9–18.
4. B. Delley, From molecules to solids with the DMol3 approach. *J. Chem. Phys.* 2000, 113, 7756–7764.
